# Supplementary material
Source: Research Square preprint supplement (doi:10.21203/rs.3.rs-9576146/v1)
Supplement: Supplementary file 1 [file ca56877dc8d544d00d02b1bc.docx]

**Supporting Information**

**For**

**Inhibitory potential of Indole (1-azaindene) against as α-amylase, human maltase-glucoamylase, Dipeptidyl peptidase-4 (DPP-4) and Peroxisome proliferator-activated receptor γ (PPARγ): Molecular Docking, Drug-likeness Prediction, ADMET Prediction and structural elucidation using DFT and Multiwfn**

Mary Lalmuankimi1*‘[0009-0000-1497-906X]’, Zodinpuia Pachuau1**, B Moiphen Phom1, Zoramthara Khiangte1, Lalhruaitluangi Vanchhawng1 & Lalhriatpuia Kawlni1

1 Department of Chemistry, Mizoram University, Aizawl, Mizoram, India
Corresponding author: Mary Lalmuankimi

Corresponding email: [marypachuau543@gmail.com](mailto:marypachuau543@gmail.com)

**Table S1.** Binding energy of Indole compared with Lepidine, Metformin and Acorbase in Kcal/mol**.**

| **Compound** | **3BAJ** | **2QMJ** | **3W2T** | **4XLD** |
| --- | --- | --- | --- | --- |
| Indole | -5.7 | -5.9 | -5.5 | -4.7 |
| Lepidine | -5.9 | -5.9 | -6.3 | -5.5 |
| Metformin | -5.1 | -4.6 | -4.5 | -3.9 |
| Acorbase | -7.3 | -6.6 | -6.3 | -6.1 |

**Table S2.** Interaction of Indole, Indazole, Carbazole and Acorbase with 3BAJ receptor

| **Ligands** | **Hydrogen bonding**  **interaction** | **Distance in angstroms** | **Hydrophobic**  **interactions (distance**  **in Å)** | **Electrostatic interactions**  **(distance in Å)** |
| --- | --- | --- | --- | --- |
| Indole | Asp A: 197 | 4.61 | Tyr A: 62 |  |
| Lepidine | Glu A: 233 | 4.33 | His A: 201, Leu A: 162,  Ala A: 198, Ile A: 235,  Lys A: 200, His A: 201 |  |
| Metformin | His A: 299  Asp A: 300 | 4.99  4.81, 4.91, 5.23 |  | Glu A: 233, Asp A: 197,  Asp A: 300, Tyr A: 62 |
| Acorbase | Thr A: 163  Ile A 235  Glu A: 233  His A: 201  Lys A: 200  C-H bond  Glu A: 233  Gly A: 306  Asp A: 300 | 1.97, 2.82  2.16  2.79  2.21  2.01  3.62  3.85  3.54 | Tyr A: 62, Trp A: 58, Trp A: 59 |  |

**Table S3.** Interaction of Indole, Lepidine, Metformin and Acorbase with 2QMJ receptor

| **Ligands** | **Hydrogen bonding interaction** | **Distance in angstroms** | **Hydrophobic interaction** | **Electrostatic interactions** |
| --- | --- | --- | --- | --- |
| Indole | Leu A: 540 | 4.23 | Val A: 184, Leu A: 540, Pro A: 206 |  |
| Lepidine | Trp A: 552 | 5.43 | Val A: 184, Leu A: 540,  Pro A: 206, Leu A: 213 |  |
| Metformin | Asp A: 542  Met A: 444  C-H bond  His A: 600  Asp A: 327 | 4.52  4.62 | Tyr A: 299 | Asp A: 542, Asp A: 203,  Asp A: 443 |
| Acorbase | Asp A: 203  Asp A: 542  Met A: 444  Asp A: 327  Trp A: 539  His A: 600  C-H bond  Asn A: 449  Asp A: 542  Asp A: 443  His A: 600 | 2.40  2.99  3.00  1.78  2.52  1.95  3.33  3.18  3.26  2.63 |  |  |

**Table S4.** Interaction of Indole, Lepidine, Metformin and Acorbase with 3W2T receptor.

| **Ligands** | **Hydrogen bonding interactions** | **Distance in angstroms** | **Hydrophobic interactions** |
| --- | --- | --- | --- |
| Indole | Arg A: 560 | 4.72 | Pro A: 510, Lys A: 512, Ile A: 529 |
| Lepidine | Pro A: 510 | 3.99 | Lys A: 512, Pro A: 475, Phe A: 559, Pro A: 512, Ile A: 529 |
| Metformin | Thr A: 565  Arg A: 560  Pro A: 510  C-H bond  Pro A: 475  Val A: 558 | 2.65  6.92, 7.20  3.55  5.44  6.63 |  |
| Acorbase | Arg A: 453  Mat A: 509  Val A: 507  C-H bond  Asn A: 497  Met A: 509 | 3.08  3.06  2.72  3.49  3.17 | Leu A: 477, Phe A: 559 |

**Table S5.** Interaction of Indole, Lepidine, Metformin and Acorbase with 4XLD receptor.

| Ligands | Hydrogen bonding interactions | Distance in angstroms | Hydrophobic interactions |
| --- | --- | --- | --- |
| Indole | Tyr A: 4.77 | 5.48 | Leu A: 469, Ile A: 472, Leu A: 476, Val A: 450, Leu A: 453 |
| Lepidine |  |  | Leu A: 453, Leu A: 465, Val A: 450, Leu A: 476, Tyr 477, Ile A: 472, Leu A: 469 |
| Metformin | Leu A: 469  Gln A: 470  Tyr A: 477 | 1.91  2.25  2.46, 1.93 |  |
| Acorbase | Val A: 446  Ile A: 445  Ile A:281  C-H bond  Leu A: 353  Gly A: 456 | 1.80  2.61  2.47  3.67  3.40 | Leu A: 452, Ile A: 456 |

**Table S6**. The physicochemical parameters, lipophilicity, pharmacokinetics, drug likeness and medicinal chemistry properties of 1H-indole, Metformin and Acorbase.

| **Property** | **Indole** | **Metformin** | **Acorbase** | **Property** | **Indole** | **Metformin** | **Acorbase** |
| --- | --- | --- | --- | --- | --- | --- | --- |
| MW(g/mol) | 117.15 | 129.16 | 645.60 | Lipinski | Yes | Yes | No |
| HBA | 0 | 2 | 19 | Ghose | No | No | No |
| HBD | 1 | 3 | 14 | Verber | Yes | Yes | No |
| TPSA | 15.79 | 91.49 | 329.10 | Egan | Yes | Yes | No |
| Consensus  LogP0/w | 1.98 | -0.89 | -6.24 | Muegge | No | No | No |
| MR | 38.30 | 36.93 | 137.92 | Bioavalability  Score | 0.55 | 0.55 | 0.17 |
| GI  Absorption | High | High | Low | PAINS | 0 alert | 0 alert | 0 alert |
| BBB  Permeant | Yes | No | No | Brenk | 0 alert | 2 alerts | 2 alerts |
| P-gp  Substrate | No | No | No | SA | 1.00 | 3.02 | 7.25 |

Abbreviations: MW, molecular weight; HBA, hydrogen bond acceptor; HBD, hydrogen bond donor; TPSA, topological polar surface area; MR, molar refractivity; GI, gastrointestinal; BBB, blood-brain barrier; P-gp, P glycoprotein; PAINS, pan-assay interface compounds; SA, synthetic accessibility.

**Table S7.** Medicinal chemistry properties of 1H-indole

| Property | Value | Property | Value |
| --- | --- | --- | --- |
| QED | 0.544 | PAINS | 0 alerts |
| GASA | 0.0 | ALARM NMR | 0 alerts |
| Synthetic accessibility | 1.0 | BMS | 0 alerts |
| Fsp3 | 0.0 | Chelator Rule | 0 alerts |
| MCE-18 | 8.0 | Colloidal aggregators | 0.044 |
| NP score | -0.407 | FLuc inhibitors | 0.231 |
| Lipinski ule | 0.0 | Blue fluorescence | 0.115 |
| Pizer rule | 0.0 | Green fluorescence | 0.018 |
| GSK rule | 0.0 | Reactive compounds | 0.969 |
| Golden triangle | 1.0 | Promiscuous compounds | 0.445 |

**Table S8.** ADMET evaluation of 1H-indole using ADMET lab 3.0

| **Absorption** |
| --- |
| Property | Value | Property | Value |
| Caco-2 Permeability | -4.522 Log unit | HIA | 0.022 |
| MDCK Permeability | -4.6378 | F20% | 0.058 |
| PAMPA | 0.315 | F30% | 0.421 |
| Pgp-inhibitor | 0.124 | F50% | 0.692 |
| Pgp-substrate | 0.289 |  |  |
| **Distribution** |
| PPB | 95.76 | OATP1B1inhibitor | 0.823 |
| VDss | 0.004 L/kg | OATP1B3 inhibitor | 0.86 |
| BBB | 0.843 | BCRP inhibitor | 0.605 |
| Fu | 5.062 | MRP1 inhibitor | 0.433 |
| **Metabolism** |
| CYP1A2 inhibitor | 0.985 | CYP2D6 substrate | 0.993 |
| CYP1A2 substrate | 0.042 | CYP3A4 inhibitor | 0.414 |
| CYP2C19 inhibitor | 0.866 | CYP3A4 substrate | 0.088 |
| CYP2C19 substrate | 0.035 | CYP2B6 inhibitor | 0.902 |
| CYP2C9 inhibitor | 0.114 | CYB2B6 substrate | 0.063 |
| CYP2C9 substrate | 0.562 | CYP2C8 inhibitor | 0.993 |
| CYP2D6 inhibitor | 0.333 | HLM Stability | 0.982 |
| **Excretion** |
| CL plasma | 8.778 ml/min/kg | T1/2 | 2.211 (hours) |
| **Toxicity** |
| hERG Blockers | 0.114 | Respiratory | 0.68 |
| hERG Blockers (10um) | 0.508 | Human Hepatotoxicity | 0.553 |
| DILI | 0.405 | Drug-induced Nephrotoxicity | 0.33 |
| AMES Mutagenicity | 0.633 | Ototoxicity | 0.267 |
| Rat Oral Acute Toxicity | 0.521 | Hematotoxicity | 0.395 |
| FDAMDD | 0.37 | Genotoxicity | 0.369 |
| Skin Sensitization | 0.384 | RPMI-8226 Immunitoxicity | 0.05 |
| Carcinogenicity | 0.615 | A549 Cytotoxicity | 0.076 |
| Eye Corrosion | 0.766 | Hek293 Cytotoxicity | 0.144 |
| Eye irritation | 0.99 | Drug-induced Neurotoxicity | 0.728 |

**Table S9**. The predicted bond lengths and bond angles of 1H-indole in the gas, water, acetonitrile, toluene and CCl4 phases employing DFT (6- 31G++**) using Gaussian 16 version, along with the experimental and calculated parameters using Gaussian 09 version from literature review, are listed.

| **Parameter** | **Exp. Value**  **From [41]** | **Theoretical**  **values from**  **[40]** | **Gas** | **Water** | **Acetonitrile** | **Toluene** | **CCl4** |
| --- | --- | --- | --- | --- | --- | --- | --- |
| N1-C2 | 1.38 | 1.38 | 1.3841 | 1.3803 | 1.3795 | 1.3813 | 1.3815 |
| N1-C8 | 1.41 | 1.39 | 1.3820 | 1.3798 | 1.379 | 1.3804 | 1.3805 |
| N1-H10 | - | 1.01 | 1.0072 | 1.0098 | 1.0111 | 1.0089 | 1.0088 |
| C2-C3 | 1.34 | 1.37 | 1.3719 | 1.3751 | 1.3762 | 1.3735 | 1.3735 |
| C2-H11 | - | - | 1.0807 | 1.0801 | 1.0814 | 1.081 | 1.0809 |
| C3-C9 | 1.45 | 1.44 | 1.4382 | 1.4387 | 1.4388 | 1.4383 | 1.4384 |
| C3-H12 | - | - | 1.0808 | 1.0807 | 1.0819 | 1.0813 | 1.0813 |
| C4-C5 | 1.39 | 1.39 | 1.3902 | 1.3918 | 1.3921 | 1.3908 | 1.3908 |
| C4-C9 | 1.40 | 1.41 | 1.4077 | 1.4097 | 1.41 | 1.4086 | 1.4086 |
| C4-H13 | - | - | 1.0865 | 1.0859 | 1.0871 | 1.0868 | 1.0868 |
| C5-C6 | 1.39 | 1.41 | 1.4127 | 1.4146 | 1.4151 | 1.4134 | 1.4134 |
| C5-H14 | - | - | 1.0861 | 1.0855 | 1.0867 | 1.0864 | 1.0864 |
| C6-C7 | 1.40 | 1.39 | 1.3917 | 1.3928 | 1.3931 | 1.3912 | 1.3912 |
| C6-H15 | - | - | 1.086 | 1.0853 | 1.0866 | 1.0863 | 1.0863 |
| C7-C8 | 1.38 | 1.40 | 1.4002 | 1.4013 | 1.402 | 1.401 | 1.401 |
| C7-H16 | - | - | 1.0866 | 1.0853 | 1.0865 | 1.0866 | 1.0866 |
| C8-C9 | 1.39 | 1.42 | 1.4242 | 1.427 | 1.4276 | 1.4258 | 1.4257 |
| C2-N1-C8 | - | 109.31 | 109.32 | 109.29 | 109.43 | 109.41 | 109.41 |
| C2-N1-H10 | - | - | 125.22 | 125.24 | 125.11 | 125.12 | 125.12 |
| C8-N1-H10 | - | - | 125.47 | 125.48 | 125.46 | 125.47 | 125.47 |
| N1-C2-C3 | 111.50 | 109.51 | 109.51 | 109.72 | 109.64 | 109.56 | 109.55 |
| N1-C2-H11 | - | - | 120.42 | 120.22 | 120.21 | 120.35 | 120.36 |
| C3-C2-H11 | - | - | 130.07 | 130.07 | 130.16 | 130.09 | 130.09 |
| C2-C3-C9 | 105.50 | 107.11 | 107.10 | 106.93 | 106.93 | 107.03 | 107.044 |
| C2-C3-H12 | - | - | 125.84 | 125.93 | 125.99 | 125.91 | 125.90 |
| C9-C3-H12 | - | - | 127.06 | 127.14 | 127.08 | 127.06 | 127.06 |
| C5-C4-C9 | 114.60 | 119.11 | 119.10 | 119.05 | 119.04 | 119.09 | 119.09 |
| C5-C4-H13 | - | - | 120.55 | 120.55 | 120.56 | 120.54 | 120.54 |
| C9-C4-H13 | - | - | 120.35 | 120.41 | 120.40 | 120.37 | 120.37 |
| C4-C5-C6 | 124.80 | 121.11 | 121.11 | 121.13 | 121.15 | 121.13 | 121.13 |
| C4-C5-H14 | - | - | 119.70 | 119.67 | 119.66 | 119.68 | 119.68 |
| C6-C5-H14 | - | - | 119.20 | 119.20 | 119.20 | 119.20 | 119.20 |
| C5-C6-C7 | 119.70 | 121.19 | 121.19 | 121.21 | 121.22 | 121.21 | 121.21 |
| C5-C6-H15 | - | - | 119.41 | 119.38 | 119.38 | 119.40 | 119.40 |
| C7-C6-H15 | - | - | 119.40 | 119.40 | 119.39 | 119.40 | 119.40 |
| C6-C7-C8 | 116.40 | 117.48 | 117.46 | 117.48 | 117.45 | 117.47 | 117.47 |
| C6-C7-H16 | - | - | 121.08 | 121.39 | 121.41 | 121.18 | 121.17 |
| C8-C7-H16 | - | - | 121.45 | 121.13 | 121.14 | 121.36 | 121.36 |
| N1-C8-C7 | - | 130.46 | 130.46 | 130.35 | 130.39 | 130.47 | 130.47 |
| N1-C8-C9 | - | 107.17 | 107.16 | 107.31 | 107.25 | 107.18 | 107.17 |
| C7-C8-C9 | - | 122.38 | 122.38 | 122.35 | 122.37 | 122.36 | 122.36 |
| C3-C9-C4 | - | 134.37 | 134.33 | 134.46 | 134.47 | 134.42 | 134.42 |
| C3-C9-C8 | - | 106.89 | 106.91 | 106.76 | 106.76 | 106.83 | 106.83 |
| C4-C9-C8 | - | 118.74 | 118.76 | 118.78 | 118.77 | 118.75 | 118.75 |

**Table S10.** The computed excitation energy, oscillator strength, band gap energy, coefficient (%) and the state and assignment employing the time-dependent Density Functional Theory at a basis set of 6-31++G** in the gaseous phase and solvent phases.

|  | **State** | **Assignment** | | **Coefficient** | **Band gap energy**  **(e****V)** | **Wavelength**  **((nm)** | **Oscillator strength**  **(f)** |
| --- | --- | --- | --- | --- | --- | --- | --- |
|  | From | To |
| Gaseous  phase | S0-S1  S0-S2  S0-S3 | HOMO  H-1  H-1  HOMO  H-1  HOMO  HOMO | L+1  LUMO  L+4  LUMO  LUMO  LUMO  L+4 | 0.70367 (99.03%)  -0.12901 (3.329%)  0.15106 (4.564%)  0.66342 (88.02%)  0.56574 (64.01%)  0.10399 (2.163%)  -0.40121 (32.19%) | 4.6423  4.7110  4.8515 | 267.08  263.18  255.56 | 0.0031  0.0803  0.0360 |
| Water | S0-S1  S0-S2  S0-S3 | H-1  HOMO  H-1  HOMO  HOMO | L+3  LUMO  LUMO  L+3  LUMO+1 | 0.13768 (3.791%)  0.67863 (92.11%)  0.58342 (68.07%)  -0.38826 (30.14%)  0.69761 (97.33%) | 4.6048  4.8341  5.0182 | 269.25  256.48  247.07 | 0.1116  0.0423  0.0091 |
| Acetonitrile | S0-S1  S0-S2  S0-S3 | H-1  HOMO  H-1  HOMO  HOMO | L+3  LUMO  LUMO  L+3  L+1 | 0.13803 (3.810%)  0.67869 (92.12%)  0.58406 (68.23%)  -0.38732 (30.00%)  0.69778 (97.38%) | 4.6042  4.8340  5.0029 | 269.28  256.48  247.82 | 0.1126  0.0432  0.0092 |
| Toluene | S0-S1  S0-S2  S0-S3 | H-1  HOMO  H-1  HOMO  HOMO | L+4  LUMO  LUMO  L+4  L+1 | 0.13294 (3.535%)  0.67989 (92.45%)  0.59395 (70.56%)  -0.37010 (27.39%)  0.70208 (98.58%) | 4.6208  4.8254  4.8363 | 268.32  256.95  256.36 | 0.1349  0.0611  0.0067 |
| CCl4 | S0-S1  S0-S2  S0-S3 | H-1  HOMO  HOMO  H-1  HOMO | L+4  LUMO  L+1  LUMO  L+4 | 0.13404 (3.593%)  0.67922 (92.27%)  0.70225 (98.63%)  0.59262 (70.24%)  -0.37195 (27.65%) | 4.6257  4.8253  4.8263 | 268.04  256.95  256.89 | 0.1315  0.0064  0.0594 |

The electronic absorption properties of the compound were investigated using time-dependent density functional theory (TD-DFT), and the resulting absorbance values along with their corresponding wavelengths (in nm) are presented below. To obtain a more comprehensive understanding of the excited-state behavior, calculations were performed using the 6-31++G(d,p) basis set in conjunction with the SMD solvation model. Different solvents phases such as water, acetonitrile, toluene and Ccl4 were systematically incorporated into the computational framework in order to probe the influence of the surrounding medium on the electronic transitions. This approach allows for a more realistic representation of solvation effects, enabling a clearer interpretation of how solvent polarity modulates the absorption characteristics and stabilizes the excited states of the compound.

| Absorbance (a.u) | Wavelength (nm) |
| --- | --- |

|  |  |  |  |  |  |
| --- | --- | --- | --- | --- | --- |
|  | Gas | Water | Acetonitrile | Toluene | Ccl4 |
| 100 | 0 | 0 | 0 | 0 | 0 |
| 100.6 | 0 | 0 | 0 | 0 | 0 |
| 101.2 | 0 | 0 | 0 | 0 | 0 |
| 101.8 | 0 | 0 | 0 | 0 | 0 |
| 102.4 | 0 | 0 | 0 | 0 | 0 |
| 103 | 0 | 0 | 0 | 0 | 0 |
| 103.6 | 0 | 0 | 0 | 0 | 0 |
| 104.2 | 0 | 0 | 0 | 0 | 0 |
| 104.8 | 0 | 0 | 0 | 0 | 0 |
| 105.4 | 0 | 0 | 0 | 0 | 0 |
| 106 | 0 | 0 | 0 | 0 | 0 |
| 106.6 | 0 | 0 | 0 | 0 | 0 |
| 107.2 | 0 | 0 | 0 | 0 | 0 |
| 107.8 | 0 | 0 | 0 | 0 | 0 |
| 108.4 | 0 | 0 | 0 | 0 | 0 |
| 109 | 0 | 0 | 0 | 0 | 0 |
| 109.6 | 0 | 0 | 0 | 0 | 0 |
| 110.2 | 0 | 0 | 0 | 0 | 0 |
| 110.8 | 0 | 0 | 0 | 0 | 0 |
| 111.4 | 0 | 0 | 0 | 0 | 0 |
| 112 | 0 | 0 | 0 | 0 | 0 |
| 112.6 | 0 | 0 | 0 | 0 | 0 |
| 113.2 | 0 | 0 | 0 | 0 | 0 |
| 113.8 | 0 | 0 | 0 | 0 | 0 |
| 114.4 | 0 | 0 | 0 | 0 | 0 |
| 115 | 0 | 0 | 0 | 0 | 0 |
| 115.6 | 0 | 0 | 0 | 0 | 0 |
| 116.2 | 0 | 0 | 0 | 0 | 0 |
| 116.8 | 0 | 0 | 0 | 0 | 0 |
| 117.4 | 0 | 0 | 0 | 0 | 0 |
| 118 | 0 | 0 | 0 | 0 | 0 |
| 118.6 | 0 | 0 | 0 | 0 | 0 |
| 119.2 | 0 | 0 | 0 | 0 | 0 |
| 119.8 | 0 | 0 | 0 | 0 | 0 |
| 120.4 | 0 | 0 | 0 | 0 | 0 |
| 121 | 0 | 0 | 0 | 0 | 0 |
| 121.6 | 0 | 0 | 0 | 0 | 0 |
| 122.2 | 0 | 0 | 0 | 0 | 0 |
| 122.8 | 0 | 0 | 0 | 0 | 0 |
| 123.4 | 0 | 0 | 0 | 0 | 0 |
| 124 | 0 | 0 | 0 | 0 | 0 |
| 124.6 | 0 | 0 | 0 | 0 | 0 |
| 125.2 | 0 | 0 | 0 | 0 | 0 |
| 125.8 | 0 | 0 | 0 | 0 | 0 |
| 126.4 | 0 | 0 | 0 | 0 | 0 |
| 127 | 0 | 0 | 0 | 0 | 0 |
| 127.6 | 0 | 0 | 0 | 0 | 0 |
| 128.2 | 0 | 0 | 0 | 0 | 0 |
| 128.8 | 0 | 0 | 0 | 0 | 0 |
| 129.4 | 0 | 0 | 0 | 0 | 0 |
| 130 | 0 | 0 | 0 | 0 | 0 |
| 130.6 | 0 | 0 | 0 | 0 | 0 |
| 131.2 | 0 | 0 | 0 | 0 | 0 |
| 131.8 | 0 | 0 | 0 | 0 | 0 |
| 132.4 | 0 | 0 | 0 | 0 | 0 |
| 133 | 0 | 0 | 0 | 0 | 0 |
| 133.6 | 0 | 0 | 0 | 0 | 0 |
| 134.2 | 0 | 0 | 0 | 0 | 0 |
| 134.8 | 0 | 0 | 0 | 0 | 0 |
| 135.4 | 0 | 0 | 0 | 0 | 0 |
| 136 | 0 | 0 | 0 | 0 | 0 |
| 136.6 | 0 | 0 | 0 | 0 | 0 |
| 137.2 | 0 | 0 | 0 | 0 | 0 |
| 137.8 | 0 | 0 | 0 | 0 | 0 |
| 138.4 | 0 | 0 | 0 | 0 | 0 |
| 139 | 0 | 0 | 0 | 0 | 0 |
| 139.6 | 0 | 0 | 0 | 0 | 0 |
| 140.2 | 0 | 0 | 0 | 0 | 0 |
| 140.8 | 0 | 0 | 0 | 0 | 0 |
| 141.4 | 0 | 0 | 0 | 0 | 0 |
| 142 | 0 | 0 | 0 | 0 | 0 |
| 142.6 | 0 | 0 | 0 | 0 | 0 |
| 143.2 | 0 | 0 | 0 | 0 | 0 |
| 143.8 | 0 | 0 | 0 | 0 | 0 |
| 144.4 | 0 | 0 | 0 | 0 | 0 |
| 145 | 0 | 0 | 0 | 0 | 0 |
| 145.6 | 0 | 0 | 0 | 0 | 0 |
| 146.2 | 0 | 0 | 0 | 0 | 0 |
| 146.8 | 0 | 0 | 0 | 0 | 0 |
| 147.4 | 0 | 0 | 0 | 0 | 0 |
| 148 | 0 | 0 | 0 | 0 | 0 |
| 148.6 | 0 | 0 | 0 | 0 | 0 |
| 149.2 | 0 | 0 | 0 | 0 | 0 |
| 149.8 | 0 | 0 | 0 | 0 | 0 |
| 150.4 | 0 | 0 | 0 | 0 | 0 |
| 151 | 0 | 0 | 0 | 0 | 0 |
| 151.6 | 0 | 0 | 0 | 0 | 0 |
| 152.2 | 0 | 0 | 0 | 0 | 0 |
| 152.8 | 0 | 0 | 0 | 0 | 0 |
| 153.4 | 0 | 0 | 0 | 0 | 0 |
| 154 | 0 | 0 | 0 | 0 | 0 |
| 154.6 | 0 | 0 | 0 | 0 | 0 |
| 155.2 | 0 | 0 | 0 | 0 | 0 |
| 155.8 | 0 | 0 | 0 | 0 | 0 |
| 156.4 | 0 | 0 | 0 | 0 | 0 |
| 157 | 0 | 0 | 0 | 0 | 0 |
| 157.6 | 0 | 0 | 0 | 0 | 0 |
| 158.2 | 0 | 0 | 0 | 0 | 0 |
| 158.8 | 0 | 0 | 0 | 0 | 0 |
| 159.4 | 0 | 0 | 0 | 0 | 0 |
| 160 | 0 | 0 | 0 | 0 | 0 |
| 160.6 | 0 | 0 | 0 | 0 | 0 |
| 161.2 | 0 | 0 | 0 | 0 | 0 |
| 161.8 | 0 | 0 | 0 | 0 | 0 |
| 162.4 | 0 | 0 | 0 | 0 | 0 |
| 163 | 0 | 0 | 0 | 0 | 0 |
| 163.6 | 0 | 0 | 0 | 0 | 0 |
| 164.2 | 0 | 0 | 0 | 0 | 0 |
| 164.8 | 0 | 0 | 0 | 0 | 0 |
| 165.4 | 0 | 0 | 0 | 0 | 0 |
| 166 | 0 | 0 | 0 | 0 | 0 |
| 166.6 | 0 | 0 | 0 | 0 | 0 |
| 167.2 | 0 | 0 | 0 | 0 | 0 |
| 167.8 | 0 | 0 | 0 | 0 | 0 |
| 168.4 | 0 | 0 | 0 | 0 | 0 |
| 169 | 0 | 0 | 0 | 0 | 0 |
| 169.6 | 0 | 0 | 0 | 0 | 0 |
| 170.2 | 0 | 0 | 0 | 0 | 0 |
| 170.8 | 0 | 0 | 0 | 0 | 0 |
| 171.4 | 0 | 0 | 0 | 0 | 0 |
| 172 | 0 | 0 | 0 | 0 | 0 |
| 172.6 | 0 | 1E-10 | 0 | 0 | 0 |
| 173.2 | 0 | 1E-10 | 1E-10 | 0 | 0 |
| 173.8 | 0 | 3E-10 | 2E-10 | 0 | 0 |
| 174.4 | 0 | 5E-10 | 4E-10 | 0 | 0 |
| 175 | 0 | 0.000000001 | 7E-10 | 0 | 0 |
| 175.6 | 1E-10 | 1.8E-09 | 1.3E-09 | 1E-10 | 1E-10 |
| 176.2 | 2E-10 | 3.3E-09 | 2.3E-09 | 2E-10 | 1E-10 |
| 176.8 | 3E-10 | 6.1E-09 | 4.3E-09 | 3E-10 | 3E-10 |
| 177.4 | 6E-10 | 0.000000011 | 7.8E-09 | 6E-10 | 5E-10 |
| 178 | 1.1E-09 | 1.96E-08 | 1.39E-08 | 1.1E-09 | 0.000000001 |
| 178.6 | 2.1E-09 | 3.45E-08 | 2.47E-08 | 0.000000002 | 1.9E-09 |
| 179.2 | 3.8E-09 | 6.04E-08 | 4.33E-08 | 3.6E-09 | 3.5E-09 |
| 179.8 | 0.000000007 | 1.044E-07 | 7.53E-08 | 6.6E-09 | 6.4E-09 |
| 180.4 | 1.25E-08 | 1.787E-07 | 1.296E-07 | 1.19E-08 | 1.15E-08 |
| 181 | 2.22E-08 | 3.029E-07 | 2.209E-07 | 2.12E-08 | 2.05E-08 |
| 181.6 | 3.91E-08 | 5.084E-07 | 3.726E-07 | 3.75E-08 | 3.63E-08 |
| 182.2 | 0.000000068 | 8.451E-07 | 6.226E-07 | 6.57E-08 | 6.35E-08 |
| 182.8 | 1.172E-07 | 1.3918E-06 | 1.0306E-06 | 1.139E-07 | 1.101E-07 |
| 183.4 | 2.002E-07 | 2.2709E-06 | 1.6901E-06 | 1.954E-07 | 1.889E-07 |
| 184 | 3.386E-07 | 3.6716E-06 | 2.7464E-06 | 3.321E-07 | 3.212E-07 |
| 184.6 | 5.675E-07 | 5.8833E-06 | 0.000004423 | 5.592E-07 | 5.409E-07 |
| 185.2 | 9.422E-07 | 9.3444E-06 | 7.0604E-06 | 9.329E-07 | 9.025E-07 |
| 185.8 | 1.5504E-06 | 1.47134E-05 | 1.11731E-05 | 1.5422E-06 | 1.4922E-06 |
| 186.4 | 2.5285E-06 | 2.29707E-05 | 1.75309E-05 | 2.5266E-06 | 2.4452E-06 |
| 187 | 4.0878E-06 | 3.55627E-05 | 2.72765E-05 | 0.000004103 | 3.9714E-06 |
| 187.6 | 6.5522E-06 | 5.46055E-05 | 4.20911E-05 | 6.6051E-06 | 6.3944E-06 |
| 188.2 | 1.04135E-05 | 8.31686E-05 | 6.44267E-05 | 1.05426E-05 | 1.02081E-05 |
| 188.8 | 0.000016413 | 0.000125668 | 9.78309E-05 | 1.66861E-05 | 1.61597E-05 |
| 189.4 | 2.56577E-05 | 0.000188403 | 0.000147394 | 2.61916E-05 | 0.00002537 |
| 190 | 3.97873E-05 | 0.00028029 | 0.00022036 | 4.07782E-05 | 3.95065E-05 |
| 190.6 | 6.12099E-05 | 0.000413849 | 0.000326958 | 6.29809E-05 | 6.10281E-05 |
| 191.2 | 0.000093434 | 0.000606521 | 0.000481519 | 0.000096507 | 9.35324E-05 |
| 191.8 | 0.00014153 | 0.000882417 | 0.000703964 | 0.000146735 | 0.000142239 |
| 192.4 | 0.000212768 | 0.001274617 | 0.001021781 | 0.000221403 | 0.000214661 |
| 193 | 0.000317491 | 0.001828171 | 0.001472608 | 0.000331562 | 0.000321529 |
| 193.6 | 0.000470296 | 0.002603977 | 0.002107612 | 0.000492866 | 0.000478045 |
| 194.2 | 0.00069164 | 0.003683764 | 0.002995844 | 0.000727318 | 0.000705587 |
| 194.8 | 0.001009963 | 0.005176445 | 0.004229827 | 0.001065621 | 0.00103399 |
| 195.4 | 0.001464525 | 0.007226134 | 0.005932671 | 0.001550291 | 0.001504578 |
| 196 | 0.002109123 | 0.010022221 | 0.008267048 | 0.002239773 | 0.002174174 |
| 196.6 | 0.003016946 | 0.013811903 | 0.01144645 | 0.003213828 | 0.003120345 |
| 197.2 | 0.004286869 | 0.018915682 | 0.015749187 | 0.004580531 | 0.004448224 |
| 197.8 | 0.00605153 | 0.025746369 | 0.021535672 | 0.006485298 | 0.006299301 |
| 198.4 | 0.008487645 | 0.034832233 | 0.029269613 | 0.00912242 | 0.008862681 |
| 199 | 0.011829058 | 0.046844984 | 0.039543795 | 0.012749729 | 0.012389378 |
| 199.6 | 0.016383141 | 0.062633357 | 0.053111226 | 0.017707057 | 0.017210339 |
| 200.2 | 0.02255125 | 0.083263144 | 0.070922497 | 0.024439348 | 0.023758995 |
| 200.8 | 0.030854055 | 0.110064543 | 0.094170269 | 0.033525333 | 0.03259927 |
| 201.4 | 0.041962658 | 0.144687793 | 0.124341873 | 0.045712887 | 0.044460125 |
| 202 | 0.056736578 | 0.189168065 | 0.163281068 | 0.061962285 | 0.060277833 |
| 202.6 | 0.076269744 | 0.24600063 | 0.213260026 | 0.083498742 | 0.081247353 |
| 203.2 | 0.101945804 | 0.318227296 | 0.277062655 | 0.111875771 | 0.108884305 |
| 203.8 | 0.135504153 | 0.409535127 | 0.358080366 | 0.149051031 | 0.145099212 |
| 204.4 | 0.179118171 | 0.524368375 | 0.460421347 | 0.197476485 | 0.192285761 |
| 205 | 0.235487278 | 0.668054499 | 0.589034385 | 0.260204783 | 0.253425024 |
| 205.6 | 0.307944438 | 0.846945026 | 0.749848139 | 0.341013893 | 0.332207601 |
| 206.2 | 0.40058079 | 1.068571874 | 0.949926687 | 0.44455206 | 0.433175757 |
| 206.8 | 0.518389077 | 1.341819549 | 1.19764195 | 0.576505176 | 0.561887624 |
| 207.4 | 0.66742745 | 1.677113445 | 1.502863431 | 0.743788627 | 0.725105512 |
| 208 | 0.855005156 | 2.086624168 | 1.877165405 | 0.954765579 | 0.931010277 |
| 208.6 | 1.089891396 | 2.58448756 | 2.334051421 | 1.219493483 | 1.189443557 |
| 209.2 | 1.382548407 | 3.187039709 | 2.889195636 | 1.550000372 | 1.512179417 |
| 209.8 | 1.745389487 | 3.91306592 | 3.560700092 | 1.960592162 | 1.913226663 |
| 210.4 | 2.193062274 | 4.784062197 | 4.369366657 | 2.468191752 | 2.409162642 |
| 211 | 2.7427571 | 5.824507382 | 5.338981883 | 3.092710232 | 3.019498861 |
| 211.6 | 3.41453963 | 7.062143672 | 6.496612569 | 3.857449845 | 3.767078152 |
| 212.2 | 4.231706387 | 8.528262801 | 7.872909327 | 4.789537696 | 4.678502417 |
| 212.8 | 5.221160959 | 10.25799475 | 9.502414953 | 5.920388355 | 5.784589178 |
| 213.4 | 6.413807917 | 12.29059539 | 11.42387394 | 7.286192648 | 7.120854324 |
| 214 | 7.844960584 | 14.66972918 | 13.68053895 | 8.928428947 | 8.728017456 |
| 214.6 | 9.554757868 | 17.44374242 | 16.32046969 | 10.89439228 | 10.65252525 |
| 215.2 | 11.58858446 | 20.66592267 | 19.39681913 | 13.23773551 | 12.94708718 |
| 215.8 | 13.99748772 | 24.39473907 | 22.96810183 | 16.0190157 | 15.67121693 |
| 216.4 | 16.83858364 | 28.69405875 | 27.09843857 | 19.30623787 | 18.89177165 |
| 217 | 20.17544347 | 33.63333372 | 31.85777158 | 23.17538707 | 22.68348022 |
| 217.6 | 24.07845162 | 39.2877532 | 37.32204432 | 27.71093893 | 27.12945076 |
| 218.2 | 28.62512498 | 45.73835563 | 43.57333974 | 33.00633777 | 32.32164657 |
| 218.8 | 33.90038294 | 53.07209542 | 50.69997117 | 39.16443077 | 38.36131901 |
| 219.4 | 39.99675728 | 61.38185915 | 58.79651989 | 46.2978459 | 45.35938523 |
| 220 | 47.01453063 | 70.7664264 | 67.96381389 | 54.52930089 | 53.43673792 |
| 220.6 | 55.06179233 | 81.33037066 | 78.30884263 | 63.99183044 | 62.72447447 |
| 221.2 | 64.25440076 | 93.18389639 | 89.94460311 | 74.82891868 | 73.36403237 |
| 221.8 | 74.7158415 | 106.4426084 | 102.989873 | 87.19452417 | 85.50721824 |
| 222.4 | 86.57697177 | 121.2272109 | 117.5689075 | 101.2529853 | 99.31611833 |
| 223 | 99.97564228 | 137.6631336 | 133.8110569 | 117.1787947 | 114.9628789 |
| 223.6 | 115.0561891 | 155.8800829 | 151.8503032 | 135.1562322 | 132.629346 |
| 224.2 | 131.9687897 | 176.011519 | 171.8247147 | 155.3788479 | 152.5065558 |
| 224.8 | 150.8686789 | 198.1940557 | 193.875818 | 178.0487865 | 174.794068 |
| 225.4 | 171.9152234 | 222.5667874 | 218.1478894 | 203.3759499 | 199.6991353 |
| 226 | 195.2708537 | 249.2705417 | 244.7871658 | 231.5769913 | 227.4357082 |
| 226.6 | 221.0998575 | 278.4470623 | 273.9409798 | 262.8741431 | 258.2232702 |
| 227.2 | 249.5670391 | 310.2381246 | 305.7568218 | 297.4938772 | 292.2855081 |
| 227.8 | 280.8362522 | 344.7845878 | 340.3813339 | 335.6654031 | 329.848818 |
| 228.4 | 315.0688167 | 382.2253902 | 377.9592424 | 377.6190098 | 371.140656 |
| 229 | 352.421833 | 422.6964916 | 418.6322347 | 423.584261 | 416.3877407 |
| 229.6 | 393.0464085 | 466.3297714 | 462.5377889 | 473.7880552 | 465.8141215 |
| 230.2 | 437.085814 | 513.2518876 | 509.8079636 | 528.4525663 | 519.639125 |
| 230.8 | 484.6735913 | 563.583108 | 560.568159 | 587.7930804 | 578.0751986 |
| 231.4 | 535.9316324 | 617.4361186 | 614.9358567 | 652.0157495 | 641.3256698 |
| 232 | 590.9682546 | 674.9148216 | 673.019351 | 721.3152833 | 709.5824426 |
| 232.6 | 649.8762966 | 736.1131313 | 734.9164804 | 795.8726026 | 783.0236566 |
| 233.2 | 712.7312606 | 801.1137785 | 800.7133726 | 875.8524797 | 861.8113311 |
| 233.8 | 779.5895275 | 869.9871339 | 870.4832132 | 961.4011917 | 946.0890236 |
| 234.4 | 850.4866708 | 942.7900614 | 944.2850502 | 1052.644215 | 1035.979529 |
| 235 | 925.4358954 | 1019.564812 | 1022.162647 | 1149.683989 | 1131.582648 |
| 235.6 | 1004.426626 | 1100.337972 | 1104.143391 | 1252.597773 | 1232.973051 |
| 236.2 | 1087.423272 | 1185.119468 | 1190.237282 | 1361.435631 | 1340.19827 |
| 236.8 | 1174.364181 | 1273.901653 | 1280.43599 | 1476.218568 | 1453.276841 |
| 237.4 | 1265.16082 | 1366.658473 | 1374.712016 | 1596.936837 | 1572.196628 |
| 238 | 1359.697178 | 1463.344728 | 1473.017955 | 1723.54846 | 1696.913345 |
| 238.6 | 1457.829424 | 1563.895438 | 1575.285862 | 1855.977957 | 1827.349309 |
| 239.2 | 1559.385821 | 1668.225322 | 1681.426757 | 1994.115336 | 1963.392442 |
| 239.8 | 1664.166912 | 1776.2284 | 1791.330245 | 2137.815331 | 2104.895528 |
| 240.4 | 1771.945973 | 1887.777723 | 1904.864278 | 2286.896928 | 2251.675763 |
| 241 | 1882.469745 | 2002.725242 | 2021.875066 | 2441.143176 | 2403.514585 |
| 241.6 | 1995.459433 | 2120.901812 | 2142.187127 | 2600.301295 | 2560.157814 |
| 242.2 | 2110.611973 | 2242.117353 | 2265.603496 | 2764.083091 | 2721.316094 |
| 242.8 | 2227.601552 | 2366.161149 | 2391.906086 | 2932.165676 | 2886.665641 |
| 243.4 | 2346.08137 | 2492.802309 | 2520.856206 | 3104.192486 | 3055.849302 |
| 244 | 2465.685632 | 2621.790374 | 2652.195235 | 3279.774612 | 3228.477909 |
| 244.6 | 2586.031735 | 2752.856079 | 2785.645448 | 3458.492407 | 3404.131932 |
| 245.2 | 2706.722655 | 2885.712263 | 2920.910994 | 3639.897377 | 3582.363404 |
| 245.8 | 2827.349477 | 3020.054926 | 3057.679027 | 3823.514345 | 3762.698116 |
| 246.4 | 2947.49407 | 3155.564429 | 3195.620967 | 4008.843846 | 3944.638056 |
| 247 | 3066.73186 | 3291.906824 | 3334.393903 | 4195.364759 | 4127.664068 |
| 247.6 | 3184.634682 | 3428.735316 | 3473.64212 | 4382.537137 | 4311.238722 |
| 248.2 | 3300.773676 | 3565.691839 | 3612.998736 | 4569.805214 | 4494.809347 |
| 248.8 | 3414.722199 | 3702.408742 | 3752.087449 | 4756.600568 | 4677.811219 |
| 249.4 | 3526.058725 | 3838.510568 | 3890.524373 | 4942.345395 | 4859.670868 |
| 250 | 3634.369698 | 3973.615915 | 4027.919954 | 5126.455886 | 5039.809463 |
| 250.6 | 3739.25231 | 4107.339371 | 4163.880948 | 5308.345661 | 5217.646267 |
| 251.2 | 3840.317186 | 4239.293496 | 4298.012449 | 5487.429232 | 5392.602105 |
| 251.8 | 3937.190937 | 4369.090848 | 4429.919954 | 5663.125469 | 5564.102834 |
| 252.4 | 4029.518568 | 4496.346031 | 4559.211444 | 5834.861036 | 5731.582775 |
| 253 | 4116.965712 | 4620.677749 | 4685.499462 | 6002.073763 | 5894.488075 |
| 253.6 | 4199.220676 | 4741.710848 | 4808.403187 | 6164.215935 | 6052.279976 |
| 254.2 | 4275.996281 | 4859.078343 | 4927.550466 | 6320.757458 | 6204.437955 |
| 254.8 | 4347.031481 | 4972.423385 | 5042.579808 | 6471.188884 | 6350.462728 |
| 255.4 | 4412.092752 | 5081.401191 | 5153.14231 | 6615.024276 | 6489.879062 |
| 256 | 4470.975243 | 5185.680882 | 5258.903508 | 6751.803874 | 6622.238407 |
| 256.6 | 4523.503681 | 5284.947248 | 5359.545134 | 6881.096562 | 6747.121306 |
| 257.2 | 4569.533035 | 5378.902404 | 5454.766773 | 7002.502105 | 6864.139579 |
| 257.8 | 4608.948925 | 5467.267333 | 5544.287397 | 7115.653147 | 6972.938253 |
| 258.4 | 4641.667804 | 5549.783306 | 5627.846771 | 7220.216958 | 7073.197247 |
| 259 | 4667.636886 | 5626.213163 | 5705.206724 | 7315.89692 | 7164.632783 |
| 259.6 | 4686.833859 | 5696.342454 | 5776.152269 | 7402.433741 | 7246.998527 |
| 260.2 | 4699.266373 | 5759.980424 | 5840.49257 | 7479.606405 | 7320.086458 |
| 260.8 | 4704.971321 | 5816.960837 | 5898.06175 | 7547.232843 | 7383.727463 |
| 261.4 | 4704.013934 | 5867.142648 | 5948.719533 | 7605.170332 | 7437.791655 |
| 262 | 4696.486686 | 5910.410494 | 5992.351719 | 7653.315634 | 7482.188425 |
| 262.6 | 4682.508051 | 5946.675035 | 6028.870492 | 7691.604863 | 7516.866237 |
| 263.2 | 4662.221104 | 5975.873112 | 6058.214561 | 7720.013106 | 7541.812165 |
| 263.8 | 4635.792004 | 5997.967753 | 6080.349137 | 7738.5538 | 7557.051194 |
| 264.4 | 4603.408363 | 6012.948008 | 6095.265739 | 7747.277874 | 7562.645292 |
| 265 | 4565.277529 | 6020.828631 | 6102.981856 | 7746.272685 | 7558.692266 |
| 265.6 | 4521.624795 | 6021.649609 | 6103.540448 | 7735.660736 | 7545.324428 |
| 266.2 | 4472.691556 | 6015.475546 | 6097.009305 | 7715.598226 | 7522.707075 |
| 266.8 | 4418.733428 | 6002.394912 | 6083.48027 | 7686.273424 | 7491.036808 |
| 267.4 | 4360.018356 | 5982.519164 | 6063.068337 | 7647.904889 | 7450.539709 |
| 268 | 4296.824712 | 5955.981746 | 6035.910631 | 7600.739573 | 7401.469398 |
| 268.6 | 4229.439409 | 5922.936985 | 6002.165277 | 7545.0508 | 7344.104973 |
| 269.2 | 4158.156051 | 5883.558895 | 5962.010186 | 7481.13616 | 7278.748881 |
| 269.8 | 4083.273108 | 5838.039888 | 5915.641743 | 7409.315324 | 7205.724709 |
| 270.4 | 4005.092166 | 5786.589421 | 5863.273438 | 7329.927816 | 7125.374938 |
| 271 | 3923.916223 | 5729.432576 | 5805.134424 | 7243.330734 | 7038.058661 |
| 271.6 | 3840.048074 | 5666.808601 | 5741.468045 | 7149.896468 | 6944.149297 |
| 272.2 | 3753.788771 | 5598.969406 | 5672.53031 | 7050.010408 | 6844.032308 |
| 272.8 | 3665.436174 | 5526.178043 | 5598.588363 | 6944.068671 | 6738.10294 |
| 273.4 | 3575.283606 | 5448.707168 | 5519.918928 | 6832.47586 | 6626.763995 |
| 274 | 3483.618596 | 5366.837504 | 5436.806761 | 6715.642869 | 6510.42367 |
| 274.6 | 3390.721741 | 5280.856319 | 5349.543112 | 6593.984746 | 6389.493441 |
| 275.2 | 3296.865661 | 5191.055917 | 5258.424209 | 6467.918623 | 6264.38604 |
| 275.8 | 3202.314076 | 5097.73216 | 5163.749768 | 6337.861736 | 6135.513506 |
| 276.4 | 3107.320976 | 5001.183033 | 5065.821549 | 6204.22953 | 6003.28534 |
| 277 | 3012.129911 | 4901.707253 | 4964.941953 | 6067.433862 | 5868.106757 |
| 277.6 | 2916.97338 | 4799.60293 | 4861.412682 | 5927.881316 | 5730.377052 |
| 278.2 | 2822.072324 | 4695.166293 | 4755.533451 | 5785.97163 | 5590.488074 |
| 278.8 | 2727.635721 | 4588.690475 | 4647.600774 | 5642.096231 | 5448.822832 |
| 279.4 | 2633.860278 | 4480.464381 | 4537.906819 | 5496.6369 | 5305.754204 |
| 280 | 2540.930208 | 4370.771617 | 4426.738341 | 5349.964554 | 5161.643786 |
| 280.6 | 2449.017104 | 4259.889512 | 4314.375691 | 5202.438155 | 5016.840855 |
| 281.2 | 2358.279888 | 4148.088205 | 4201.091907 | 5054.403734 | 4871.681459 |
| 281.8 | 2268.864839 | 4035.629832 | 4087.151892 | 4906.193548 | 4726.487625 |
| 282.4 | 2180.905692 | 3922.767778 | 3972.811673 | 4758.125354 | 4581.566694 |
| 283 | 2094.523802 | 3809.746031 | 3858.317742 | 4610.501795 | 4437.210767 |
| 283.6 | 2009.828367 | 3696.798606 | 3743.906487 | 4463.609908 | 4293.696265 |
| 284.2 | 1926.916705 | 3584.149056 | 3629.803702 | 4317.720743 | 4151.283599 |
| 284.8 | 1845.874577 | 3472.010063 | 3516.224174 | 4173.089084 | 4010.216943 |
| 285.4 | 1766.776554 | 3360.583112 | 3403.37136 | 4029.953271 | 3870.724111 |
| 286 | 1689.686421 | 3250.05823 | 3291.43713 | 3888.535127 | 3733.016516 |
| 286.6 | 1614.657606 | 3140.613813 | 3180.601585 | 3749.03996 | 3597.289228 |
| 287.2 | 1541.733641 | 3032.416508 | 3071.032956 | 3611.656666 | 3463.721107 |
| 287.8 | 1470.94864 | 2925.621174 | 2962.887553 | 3476.557896 | 3332.475011 |
| 288.4 | 1402.327795 | 2820.370894 | 2856.309785 | 3343.900305 | 3203.698077 |
| 289 | 1335.887881 | 2716.797054 | 2751.432246 | 3213.824858 | 3077.522055 |
| 289.6 | 1271.637767 | 2615.01947 | 2648.375837 | 3086.457202 | 2954.063711 |
| 290.2 | 1209.578939 | 2515.146571 | 2547.249957 | 2961.908086 | 2833.425263 |
| 290.8 | 1149.706007 | 2417.27562 | 2448.152726 | 2840.273831 | 2715.694878 |
| 291.4 | 1092.007226 | 2321.492982 | 2351.171256 | 2721.636835 | 2600.947189 |
| 292 | 1036.464995 | 2227.874425 | 2256.381958 | 2606.066121 | 2489.243859 |
| 292.6 | 983.0563592 | 2136.485456 | 2163.850881 | 2493.617905 | 2380.634157 |
| 293.2 | 931.7534937 | 2047.381686 | 2073.634079 | 2384.336193 | 2275.155564 |
| 293.8 | 882.5241743 | 1960.609211 | 1985.777999 | 2278.253392 | 2172.834391 |
| 294.4 | 835.3322353 | 1876.205028 | 1900.319898 | 2175.390938 | 2073.686406 |
| 295 | 790.1380097 | 1794.197451 | 1817.28827 | 2075.759932 | 1977.717473 |
| 295.6 | 746.8987506 | 1714.606554 | 1736.703284 | 1979.361778 | 1884.924182 |
| 296.2 | 705.5690345 | 1637.444611 | 1658.577237 | 1886.188823 | 1795.29449 |
| 296.8 | 666.1011446 | 1562.716554 | 1582.915008 | 1796.224991 | 1708.808351 |
| 297.4 | 628.4454337 | 1490.420423 | 1509.714523 | 1709.446416 | 1625.438332 |
| 298 | 592.5506667 | 1420.547824 | 1438.967207 | 1625.822062 | 1545.150227 |
| 298.6 | 558.3643416 | 1353.084383 | 1370.658447 | 1545.314325 | 1467.903654 |
| 299.2 | 525.8329907 | 1288.01019 | 1304.768044 | 1467.879633 | 1393.652631 |
| 299.8 | 494.9024598 | 1225.300247 | 1241.270656 | 1393.469015 | 1322.346145 |
| 300.4 | 465.5181679 | 1164.924895 | 1180.13624 | 1322.028662 | 1253.928685 |
| 301 | 437.6253464 | 1106.850242 | 1121.330471 | 1253.500462 | 1188.340772 |
| 301.6 | 411.1692579 | 1051.038569 | 1064.815166 | 1187.822514 | 1125.519452 |
| 302.2 | 386.0953976 | 997.4487282 | 1010.548677 | 1124.929622 | 1065.398777 |
| 302.8 | 362.349674 | 946.0365291 | 958.4862807 | 1064.753764 | 1007.910253 |
| 303.4 | 339.878574 | 896.7551027 | 908.5805518 | 1007.224532 | 952.9832709 |
| 304 | 318.629309 | 849.5552551 | 860.7817153 | 952.2695607 | 900.5455083 |
| 304.6 | 298.549946 | 804.3858025 | 815.0379859 | 899.8149153 | 850.5233096 |
| 305.2 | 279.5895225 | 761.1938887 | 771.2958895 | 849.7854679 | 802.84204 |
| 305.8 | 261.6981472 | 719.9252869 | 729.5005667 | 802.1052419 | 757.4264159 |
| 306.4 | 244.8270868 | 680.5246824 | 689.5960594 | 756.6977351 | 714.2008111 |
| 307 | 228.9288392 | 642.9359389 | 651.5255789 | 713.4862184 | 673.0895395 |
| 307.6 | 213.9571954 | 607.102347 | 615.2317575 | 672.3940113 | 634.0171152 |
| 308.2 | 199.8672898 | 572.9668555 | 580.6568814 | 633.3447343 | 596.9084902 |
| 308.8 | 186.6156397 | 540.4722855 | 547.7431079 | 596.2625396 | 561.6892704 |
| 309.4 | 174.1601755 | 509.5615286 | 516.4326649 | 561.0723208 | 528.2859111 |
| 310 | 162.4602621 | 480.177728 | 486.6680342 | 527.6999012 | 496.6258925 |
| 310.6 | 151.4767113 | 452.2644444 | 458.3921191 | 496.0722037 | 466.6378761 |
| 311.2 | 141.1717883 | 425.7658066 | 431.5483964 | 466.1174007 | 438.2518434 |
| 311.8 | 131.5092096 | 400.6266473 | 406.0810541 | 437.7650473 | 411.3992169 |
| 312.4 | 122.4541367 | 376.7926251 | 381.9351143 | 410.946197 | 386.0129653 |
| 313 | 113.973163 | 354.210333 | 359.0565428 | 385.5935015 | 362.0276929 |
| 313.6 | 106.0342966 | 332.8273936 | 337.3923462 | 361.6412958 | 339.3797156 |
| 314.2 | 98.60693855 | 312.5925433 | 316.890656 | 339.025669 | 318.0071221 |
| 314.8 | 91.66185764 | 293.4557038 | 297.5008015 | 317.6845219 | 297.8498242 |
| 315.4 | 85.17116168 | 275.3680439 | 279.1733722 | 297.5576129 | 278.8495944 |
| 316 | 79.10826626 | 258.2820303 | 261.8602696 | 278.5865923 | 260.950093 |
| 316.6 | 73.44786106 | 242.1514699 | 245.5147491 | 260.7150257 | 244.0968862 |
| 317.2 | 68.16587433 | 226.9315419 | 230.0914537 | 243.8884091 | 228.2374539 |
| 317.8 | 63.23943572 | 212.5788237 | 215.5464395 | 228.0541737 | 213.3211904 |
| 318.4 | 58.64683799 | 199.0513072 | 201.8371924 | 213.1616839 | 199.299397 |
| 319 | 54.36749781 | 186.3084101 | 188.9226397 | 199.1622278 | 186.1252686 |
| 319.6 | 50.38191582 | 174.310979 | 176.7631535 | 186.0090009 | 173.7538732 |
| 320.2 | 46.67163652 | 163.0212886 | 165.3205493 | 173.6570844 | 162.1421275 |
| 320.8 | 43.21920783 | 152.4030339 | 154.5580794 | 162.0634181 | 151.2487662 |
| 321.4 | 40.00814083 | 142.4213193 | 144.4404206 | 151.1867688 | 141.0343087 |
| 322 | 37.02286972 | 133.0426422 | 134.9336586 | 140.9876949 | 131.461021 |
| 322.6 | 34.2487122 | 124.2348735 | 126.0052681 | 131.4285073 | 122.4928754 |
| 323.2 | 31.67183037 | 115.9672347 | 117.6240898 | 122.4732276 | 114.095507 |
| 323.8 | 29.27919232 | 108.2102719 | 109.760304 | 114.087544 | 106.2361682 |
| 324.4 | 27.05853453 | 100.9358278 | 102.3854024 | 106.2387644 | 98.88368186 |
| 325 | 24.99832511 | 94.11701069 | 95.47215707 | 98.8957691 | 92.00839272 |
| 325.6 | 23.08772798 | 87.72816249 | 88.99458785 | 92.02896096 | 85.58211772 |
| 326.2 | 21.31656809 | 81.74482477 | 82.92792824 | 85.6102157 | 79.57809592 |
| 326.8 | 19.67529767 | 76.14370378 | 77.24859002 | 79.61283091 | 73.97093789 |
| 327.4 | 18.15496362 | 70.90263444 | 71.93412694 | 74.01147507 | 68.73657489 |
| 328 | 16.74717596 | 66.00054373 | 66.96319769 | 68.78213635 | 63.85220824 |
| 328.6 | 15.44407747 | 61.41741354 | 62.31552838 | 63.9020716 | 59.29625889 |
| 329.2 | 14.23831453 | 57.13424327 | 57.97187477 | 59.34975571 | 55.04831751 |
| 329.8 | 13.123009 | 53.13301235 | 53.91398439 | 55.10483145 | 51.08909524 |
| 330.4 | 12.09173141 | 49.39664289 | 50.12455881 | 51.14806004 | 47.40037521 |
| 331 | 11.13847518 | 45.90896246 | 46.58721598 | 47.46127258 | 43.96496496 |
| 331.6 | 10.25763204 | 42.65466735 | 43.28645316 | 44.02732232 | 40.76664989 |
| 332.2 | 9.443968605 | 39.61928623 | 40.20761011 | 40.83003809 | 37.79014784 |
| 332.8 | 8.692603934 | 36.78914442 | 37.33683306 | 37.85417882 | 35.02106483 |
| 333.4 | 7.998988304 | 34.15132887 | 34.66103918 | 35.0853893 | 32.44585205 |
| 334 | 7.358882948 | 31.69365383 | 32.16788198 | 32.51015716 | 30.05176419 |
| 334.6 | 6.76834085 | 29.40462736 | 29.84571741 | 30.11577123 | 27.82681906 |
| 335.2 | 6.22368852 | 27.27341875 | 27.68357087 | 27.89028118 | 25.75975861 |
| 335.8 | 5.721508735 | 25.28982676 | 25.67110515 | 25.82245866 | 23.84001132 |
| 336.4 | 5.258624201 | 23.44424894 | 23.79858935 | 23.90175968 | 22.05765598 |
| 337 | 4.832082115 | 21.7276518 | 22.05686871 | 22.11828851 | 20.40338686 |
| 337.6 | 4.439139579 | 20.13154207 | 20.43733559 | 20.46276293 | 18.86848032 |
| 338.2 | 4.077249844 | 18.64793894 | 18.9319013 | 18.92648091 | 17.44476277 |
| 338.8 | 3.744049336 | 17.26934727 | 17.53296906 | 17.50128864 | 16.12457994 |
| 339.4 | 3.437345446 | 15.98873192 | 16.23340801 | 16.17954996 | 14.90076762 |
| 340 | 3.155105037 | 14.79949302 | 15.02652817 | 14.95411708 | 13.76662362 |
| 340.6 | 2.895443633 | 13.69544229 | 13.90605647 | 13.81830274 | 12.71588103 |
| 341.2 | 2.656615276 | 12.6707803 | 12.86611379 | 12.76585352 | 11.74268283 |
| 341.8 | 2.437002997 | 11.72007481 | 11.90119296 | 11.7909245 | 10.84155762 |
| 342.4 | 2.235109875 | 10.83823999 | 11.00613778 | 10.88805514 | 10.0073966 |
| 343 | 2.04955067 | 10.02051662 | 10.17612297 | 10.05214632 | 9.235431714 |
| 343.6 | 1.879043972 | 9.26245322 | 9.406635044 | 9.278438575 | 8.521214904 |
| 344.2 | 1.722404867 | 8.559888075 | 8.693454137 | 8.562491392 | 7.860598423 |
| 344.8 | 1.578538066 | 7.908932132 | 8.032636677 | 7.900163653 | 7.249716226 |
| 345.4 | 1.446431495 | 7.305952745 | 7.42049893 | 7.287595067 | 6.684966337 |
| 346 | 1.325150296 | 6.747558251 | 6.85360138 | 6.72118862 | 6.162994196 |
| 346.6 | 1.213831238 | 6.230583329 | 6.328733903 | 6.197593984 | 5.680676918 |
| 347.2 | 1.111677497 | 5.752075131 | 5.842901726 | 5.713691838 | 5.235108442 |
| 347.8 | 1.017953791 | 5.309280151 | 5.39331212 | 5.266579079 | 4.823585523 |
| 348.4 | 0.93198185 | 4.899631795 | 4.97736182 | 4.853554871 | 4.443594533 |
| 349 | 0.85313619 | 4.52073864 | 4.592625126 | 4.472107494 | 4.092799028 |
| 349.6 | 0.780840192 | 4.170373337 | 4.236842666 | 4.119901966 | 3.769028056 |
| 350.2 | 0.714562441 | 3.84646214 | 3.907910786 | 3.794768394 | 3.470265156 |
| 350.8 | 0.653813333 | 3.547075035 | 3.603871551 | 3.494691012 | 3.194638021 |
| 351.4 | 0.598141919 | 3.270416428 | 3.322903314 | 3.21779789 | 2.940408792 |
| 352 | 0.54713297 | 3.014816381 | 3.063311831 | 2.962351263 | 2.705964953 |
| 352.6 | 0.50040426 | 2.778722367 | 2.823521912 | 2.726738455 | 2.489810783 |
| 353.2 | 0.457604035 | 2.560691509 | 2.602069553 | 2.509463367 | 2.290559348 |
| 353.8 | 0.418408679 | 2.359383288 | 2.397594548 | 2.309138499 | 2.106925002 |
| 354.4 | 0.382520536 | 2.173552696 | 2.208833552 | 2.124477472 | 1.937716364 |
| 355 | 0.349665904 | 2.002043805 | 2.034613562 | 1.954288029 | 1.78182974 |
| 355.6 | 0.319593169 | 1.843783737 | 1.873845802 | 1.797465486 | 1.638242985 |
| 356.2 | 0.292071082 | 1.697777007 | 1.725519999 | 1.652986604 | 1.506009752 |
| 356.8 | 0.266887163 | 1.563100225 | 1.588698999 | 1.519903865 | 1.384254128 |
| 357.4 | 0.243846223 | 1.438897131 | 1.462513749 | 1.397340115 | 1.272165622 |
| 358 | 0.222769004 | 1.324373951 | 1.346158575 | 1.284483576 | 1.168994489 |
| 358.6 | 0.203490911 | 1.218795047 | 1.238886787 | 1.180583173 | 1.074047365 |
| 359.2 | 0.185860851 | 1.121478858 | 1.140006548 | 1.084944191 | 0.986683203 |
| 359.8 | 0.169740156 | 1.031794096 | 1.04887703 | 0.99692421 | 0.906309478 |
| 360.4 | 0.155001587 | 0.9491562 | 0.964904811 | 0.915929331 | 0.83237866 |
| 361 | 0.14152842 | 0.873024024 | 0.887540521 | 0.841410645 | 0.76438492 |
| 361.6 | 0.129213595 | 0.80289674 | 0.816275699 | 0.772860957 | 0.701861078 |
| 362.2 | 0.117958943 | 0.738310958 | 0.750639874 | 0.709811732 | 0.644375747 |
| 362.8 | 0.107674457 | 0.678838036 | 0.690197835 | 0.651830249 | 0.591530693 |
| 363.4 | 0.098277638 | 0.62408157 | 0.634547086 | 0.598516962 | 0.54295837 |
| 364 | 0.089692878 | 0.573675061 | 0.583315483 | 0.54950304 | 0.498319634 |
| 364.6 | 0.081850898 | 0.527279738 | 0.536159022 | 0.504448086 | 0.457301618 |
| 365.2 | 0.074688234 | 0.484582538 | 0.492759789 | 0.463038014 | 0.419615763 |
| 365.8 | 0.068146754 | 0.445294216 | 0.452824049 | 0.424983078 | 0.384995983 |
| 366.4 | 0.062173222 | 0.409147597 | 0.416080466 | 0.390016045 | 0.35319697 |
| 367 | 0.056718897 | 0.375895945 | 0.382278453 | 0.357890497 | 0.32399262 |
| 367.6 | 0.051739154 | 0.34531145 | 0.351186635 | 0.328379258 | 0.297174567 |
| 368.2 | 0.04719315 | 0.31718382 | 0.322591418 | 0.301272929 | 0.272550837 |
| 368.8 | 0.043043506 | 0.291318976 | 0.29629567 | 0.276378545 | 0.249944586 |
| 369.4 | 0.039256021 | 0.267537835 | 0.272117485 | 0.253518309 | 0.229192946 |
| 370 | 0.035799402 | 0.245675189 | 0.249889042 | 0.232528439 | 0.210145942 |
| 370.6 | 0.032645029 | 0.225578657 | 0.229455545 | 0.213258087 | 0.192665504 |
| 371.2 | 0.029766721 | 0.207107717 | 0.210674238 | 0.195568347 | 0.176624538 |
| 371.8 | 0.027140541 | 0.190132809 | 0.193413496 | 0.179331328 | 0.161906081 |
| 372.4 | 0.024744599 | 0.174534498 | 0.177551979 | 0.164429305 | 0.148402506 |
| 373 | 0.022558884 | 0.160202707 | 0.162977846 | 0.150753929 | 0.136014799 |
| 373.6 | 0.020565106 | 0.147036001 | 0.149588034 | 0.138205494 | 0.124651881 |
| 374.2 | 0.018746546 | 0.134940921 | 0.137287582 | 0.126692268 | 0.114229989 |
| 374.8 | 0.017087927 | 0.123831377 | 0.12598901 | 0.116129864 | 0.104672096 |
| 375.4 | 0.01557529 | 0.113628077 | 0.115611745 | 0.106440669 | 0.095907388 |
| 376 | 0.01419588 | 0.104258003 | 0.106081585 | 0.097553306 | 0.087870765 |
| 376.6 | 0.012938048 | 0.095653924 | 0.097330209 | 0.089402148 | 0.080502394 |
| 377.2 | 0.011791152 | 0.08775395 | 0.089294716 | 0.081926859 | 0.073747288 |
| 377.8 | 0.010745473 | 0.080501114 | 0.081917212 | 0.075071982 | 0.067554924 |
| 378.4 | 0.009792136 | 0.073842989 | 0.075144412 | 0.068786545 | 0.061878883 |
| 379 | 0.008923036 | 0.067731332 | 0.068927282 | 0.063023707 | 0.056676528 |
| 379.6 | 0.008130777 | 0.062121761 | 0.06322071 | 0.057740432 | 0.051908695 |
| 380.2 | 0.007408602 | 0.056973446 | 0.057983194 | 0.052897182 | 0.047539419 |
| 380.8 | 0.006750347 | 0.052248833 | 0.05317656 | 0.048457638 | 0.043535676 |
| 381.4 | 0.006150385 | 0.047913386 | 0.048765701 | 0.044388443 | 0.039867145 |
| 382 | 0.005603579 | 0.043935348 | 0.044718333 | 0.040658965 | 0.036505994 |
| 382.6 | 0.005105244 | 0.04028552 | 0.041004771 | 0.037241075 | 0.033426673 |
| 383.2 | 0.004651103 | 0.03693706 | 0.037597728 | 0.034108947 | 0.030605734 |
| 383.8 | 0.004237255 | 0.033865297 | 0.034472118 | 0.031238874 | 0.02802166 |
| 384.4 | 0.00386014 | 0.031047554 | 0.031604887 | 0.028609095 | 0.025654707 |
| 385 | 0.003516512 | 0.028462993 | 0.028974847 | 0.026199637 | 0.023486759 |
| 385.6 | 0.003203409 | 0.026092466 | 0.026562528 | 0.02399217 | 0.021501199 |
| 386.2 | 0.002918129 | 0.023918381 | 0.024350043 | 0.021969876 | 0.019682784 |
| 386.8 | 0.002658209 | 0.021924579 | 0.022320959 | 0.020117323 | 0.018017533 |
| 387.4 | 0.002421402 | 0.020096214 | 0.020460178 | 0.018420353 | 0.016492624 |
| 388 | 0.00220566 | 0.018419652 | 0.018753837 | 0.01686598 | 0.015096299 |
| 388.6 | 0.002009114 | 0.016882373 | 0.017189202 | 0.015442292 | 0.013817777 |
| 389.2 | 0.001830061 | 0.015472878 | 0.015754579 | 0.014138364 | 0.012647174 |
| 389.8 | 0.00166695 | 0.01418061 | 0.014439231 | 0.012944175 | 0.01157543 |
| 390.4 | 0.001518363 | 0.012995878 | 0.013233301 | 0.011850539 | 0.010594236 |
| 391 | 0.001383011 | 0.011909783 | 0.012127737 | 0.010849032 | 0.009695981 |
| 391.6 | 0.001259718 | 0.010914158 | 0.011114233 | 0.00993193 | 0.008873686 |
| 392.2 | 0.00114741 | 0.010001507 | 0.010185163 | 0.009092152 | 0.008120957 |
| 392.8 | 0.001045113 | 0.009164949 | 0.009333529 | 0.008323208 | 0.007431932 |
| 393.4 | 0.000951933 | 0.008398172 | 0.008552907 | 0.007619148 | 0.006801244 |
| 394 | 0.000867062 | 0.007695381 | 0.007837405 | 0.00697452 | 0.006223971 |
| 394.6 | 0.000789757 | 0.00705126 | 0.007181614 | 0.006384326 | 0.005695608 |
| 395.2 | 0.000719347 | 0.006460933 | 0.006580573 | 0.005843987 | 0.005212023 |
| 395.8 | 0.000655216 | 0.005919925 | 0.006029728 | 0.005349305 | 0.004769437 |
| 396.4 | 0.000596805 | 0.005424131 | 0.005524904 | 0.004896436 | 0.004364382 |
| 397 | 0.000543605 | 0.004969788 | 0.005062271 | 0.004481857 | 0.003993687 |
| 397.6 | 0.00049515 | 0.004553441 | 0.004638315 | 0.004102339 | 0.003654444 |
| 398.2 | 0.000451018 | 0.004171923 | 0.004249813 | 0.003754926 | 0.003343993 |
| 398.8 | 0.000410824 | 0.003822331 | 0.003893809 | 0.003436909 | 0.003059895 |
| 399.4 | 0.000374215 | 0.003502 | 0.003567593 | 0.003145807 | 0.002799919 |

**Table S11.** Observed and calculated IR frequencies from DFT B3LYP/6-31++G(d,p) and below the table, lists of the frequency, epsilon, absorbance and transmittance (%) in gas, water, acetonitrile, toluene and Ccl4 can be seen.

| **Mode no.** | **Experimental**  **IR** | **Theoretical IR**  **from [40]** | **Calculated IR**  **In the gas phase** | **Calculated IR frequencies in CCl4 solvent** |
| --- | --- | --- | --- | --- |
| 1 | 224 | 215.6334 | 215.06 | 215.22 |
| 2 | 254 | 245.3052 | 245.13 | 246.18 |
| 3 | - | 395.4449 | 389.09 | 397.83 |
| 4 | 397 | 403.7544 | 403.24 | 402.64 |
| 5 | 423 | 432.5648 | 432.08 | 432.35 |
| 6 | 542 | 550.6917 | 550.72 | 550.38 |
| 7 | 487 | 585.0772 | 584.87 | 586.27 |
| 8 | 575 | 613.9898 | 613.46 | 614.03 |
| 9 | 607 | 615.6582 | 615.87 | 615.72 |
| 10 | - | 726.7603 | 726.37 | 728.19 |
| 11 | 608 | 753.4474 | 752.62 | 753.63 |
| 12 | 725 | 773.6568 | 773.73 | 772.73 |
| 13 | 758 | 779.2829 | 779.05 | 778.84 |
| 14 | - | 857.0529 | 856.37 | 857.81 |
| 15 | 767 | 867.7829 | 867.36 | 869.83 |
| 16 | 848 | 884.0373 | 884.10 | 884.18 |
| 17 | 873 | 907.5629 | 907.71 | 906.73 |
| 18 | 895 | 940.2346 | 939.07 | 941.11 |
| 19 | 930 | 979.8852 | 978.91 | 978.99 |
| 20 | 970 | 1034.6071 | 1033.95 | 1032.92 |
| 21 | 1010 | 1090.1285 | 1090.00 | 1089.27 |
| 22 | 1064 | 1111.089 | 1110.99 | 1109.92 |
| 23 | 1092 | 1143.6741 | 1143.40 | 1140.62 |
| 24 | 1119 | 1175.933 | 1175.46 | 1172.08 |
| 25 | 1147 | 1224.6296 | 1224.70 | 1225.12 |
| 26 | 1191 | 1269.4226 | 1269.05 | 1269.83 |
| 27 | 1203 | 1299.8306 | 1299.86 | 1299.47 |
| 28 | - | 1375.2498 | 1375.45 | 1375.64 |
| 29 | 1276 | 1386.5387 | 1386.17 | 1385.48 |
| 30 | 1343 | 1451.0034 | 1450.86 | 1452.64 |
| 31 | 1412 | 1486.2486 | 1485.98 | 1485.01 |
| 32 | 1455 | 1527.6709 | 1527.61 | 1526.31 |
| 33 | 1487 | 1555.4037 | 1554.91 | 1550.25 |
| 34 | 1576 | 1622.4504 | 1622.31 | 1620.49 |
| 35 | 1616 | 1664.2488 | 1664.25 | 1662.65 |
| 36 | - | 3176.4785 | 3175.85 | 3177.26 |
| 37 | - | 3182.5427 | 3181.98 | 3184.04 |
| 38 | - | 3193.2912 | 3192.67 | 3193.57 |
| 39 | - | 3204.8371 | 3204.11 | 3204.07 |
| 40 | - | 3253.4916 | 3253.18 | 3252.76 |
| 41 | - | 3273.2020 | 3272.76 | 3273.89 |
| 42 | - | 3686.2344 | 3685.76 | 3670.45 |

| Gas |  |  |  |
| --- | --- | --- | --- |
| frequency | epsilon | Absorbance | Transmitttance (%) |
| 0 | 0 | 0 | 100 |
| 8 | 0 | 0 | 100 |
| 16 | 0 | 0 | 100 |
| 24 | 0 | 0 | 100 |
| 32 | 0 | 0 | 100 |
| 40 | 0 | 0 | 100 |
| 48 | 0 | 0 | 100 |
| 56 | 0.027791855 | 0.000081015 | 99.9918985 |
| 64 | 0.030811255 | 0.000089816 | 99.9910184 |
| 72 | 0.034350692 | 0.000100134 | 99.9899866 |
| 80 | 0.038536782 | 0.000112337 | 99.98876634 |
| 88 | 0.043665395 | 0.000127287 | 99.98727132 |
| 96 | 0.049719811 | 0.000144936 | 99.98550643 |
| 104 | 0.057126183 | 0.000166526 | 99.98334744 |
| 112 | 0.066318997 | 0.000193323 | 99.98066769 |
| 120 | 0.077922308 | 0.000227147 | 99.97728526 |
| 128 | 0.092858332 | 0.000270687 | 99.97293134 |
| 136 | 0.112536122 | 0.000328048 | 99.96719517 |
| 144 | 0.139195629 | 0.000405762 | 99.95942379 |
| 152 | 0.176572404 | 0.000514717 | 99.94852828 |
| 160 | 0.231275416 | 0.000674179 | 99.93258208 |
| 168 | 0.315905227 | 0.000920879 | 99.90791208 |
| 176 | 0.456954341 | 0.001332044 | 99.86679557 |
| 184 | 0.718090384 | 0.002093269 | 99.79067313 |
| 192 | 1.285163087 | 0.003746313 | 99.62536866 |
| 200 | 2.897827143 | 0.008447308 | 99.15526917 |
| 208 | 10.67820918 | 0.031127504 | 96.88724964 |
| 216 | 41.69931107 | 0.121555537 | 87.84444626 |
| 224 | 7.3482271 | 0.021420442 | 97.85795575 |
| 232 | 2.500874024 | 0.00729017 | 99.27098295 |
| 240 | 1.356193609 | 0.003953371 | 99.60466291 |
| 248 | 0.979242242 | 0.002854539 | 99.71454608 |
| 256 | 0.674578586 | 0.00196643 | 99.80335703 |
| 264 | 0.566261596 | 0.00165068 | 99.83493197 |
| 272 | 0.523476531 | 0.00152596 | 99.84740402 |
| 280 | 0.529038963 | 0.001542175 | 99.84578255 |
| 288 | 0.552077793 | 0.001609334 | 99.83906662 |
| 296 | 0.600554057 | 0.001750645 | 99.82493555 |
| 304 | 0.676968652 | 0.001973397 | 99.80266032 |
| 312 | 0.788435475 | 0.002298328 | 99.77016719 |
| 320 | 0.948376945 | 0.002764565 | 99.72354347 |
| 328 | 1.180752055 | 0.00344195 | 99.65580498 |
| 336 | 1.5294693 | 0.004458478 | 99.5541522 |
| 344 | 2.080467436 | 0.006064665 | 99.39353354 |
| 352 | 3.019555929 | 0.008802154 | 99.11978463 |
| 360 | 4.810388804 | 0.014022519 | 98.59774807 |
| 368 | 8.887438274 | 0.025907319 | 97.40926814 |
| 376 | 21.54672345 | 0.062809756 | 93.71902441 |
| 384 | 95.18751059 | 0.277476263 | 72.2523737 |
| 392 | 164.0279674 | 0.478149572 | 52.18504281 |
| 400 | 39.10671954 | 0.113998006 | 88.60019941 |
| 408 | 17.54997362 | 0.051159034 | 94.88409659 |
| 416 | 7.710231136 | 0.022475702 | 97.7524298 |
| 424 | 6.979834769 | 0.020346561 | 97.96534392 |
| 432 | 18.71972279 | 0.05456891 | 94.54310897 |
| 440 | 5.016535291 | 0.014623446 | 98.53765535 |
| 448 | 2.231628051 | 0.006505305 | 99.34946948 |
| 456 | 1.437518218 | 0.004190436 | 99.58095639 |
| 464 | 1.049040796 | 0.003058005 | 99.69419946 |
| 472 | 0.818375362 | 0.002385604 | 99.76143957 |
| 480 | 0.665866367 | 0.001941033 | 99.80589669 |
| 488 | 0.55880972 | 0.001628958 | 99.83710423 |
| 496 | 0.48110362 | 0.001402441 | 99.85975593 |
| 504 | 0.4239538 | 0.001235846 | 99.87641539 |
| 512 | 0.382387338 | 0.001114678 | 99.88853222 |
| 520 | 0.353886698 | 0.001031597 | 99.89684029 |
| 528 | 0.338311308 | 0.000986194 | 99.90138059 |
| 536 | 0.340684486 | 0.000993112 | 99.9006888 |
| 544 | 0.398094051 | 0.001160464 | 99.88395363 |
| 552 | 0.44822532 | 0.001306599 | 99.86934012 |
| 560 | 0.316125155 | 0.00092152 | 99.90784797 |
| 568 | 0.501297847 | 0.001461308 | 99.85386922 |
| 576 | 0.996411017 | 0.002904587 | 99.7095413 |
| 584 | 3.862719076 | 0.011260016 | 98.87399844 |
| 592 | 1.881083999 | 0.005483452 | 99.45165479 |
| 600 | 2.861929557 | 0.008342665 | 99.16573349 |
| 608 | 10.10548814 | 0.029457994 | 97.05420063 |
| 616 | 22.85243103 | 0.066615958 | 93.33840425 |
| 624 | 4.614956335 | 0.013452824 | 98.65471759 |
| 632 | 2.024081067 | 0.005900296 | 99.40997044 |
| 640 | 1.419037606 | 0.004136564 | 99.58634358 |
| 648 | 1.264679588 | 0.003686603 | 99.6313397 |
| 656 | 1.289021626 | 0.003757561 | 99.62424387 |
| 664 | 1.427644883 | 0.004161655 | 99.58383451 |
| 672 | 1.678346386 | 0.004892462 | 99.51075379 |
| 680 | 2.077955877 | 0.006057343 | 99.39426567 |
| 688 | 2.718331935 | 0.007924071 | 99.20759291 |
| 696 | 3.816579425 | 0.011125516 | 98.88744837 |
| 704 | 5.975261114 | 0.017418179 | 98.25818207 |
| 712 | 11.50638534 | 0.033541678 | 96.64583223 |
| 720 | 36.49768527 | 0.106392543 | 89.36074569 |
| 728 | 103.3614213 | 0.301303614 | 69.86963862 |
| 736 | 35.73979482 | 0.104183255 | 89.58167448 |
| 744 | 67.76934465 | 0.197550964 | 80.24490358 |
| 752 | 343.0473528 | 0.999999862 | 1.37572E-05 |
| 760 | 83.33578573 | 0.242927904 | 75.70720964 |
| 768 | 32.11994557 | 0.093631217 | 90.63687829 |
| 776 | 51.74504911 | 0.150839357 | 84.91606434 |
| 784 | 29.06937273 | 0.084738648 | 91.52613524 |
| 792 | 9.209245888 | 0.026845404 | 97.31545965 |
| 800 | 4.990083539 | 0.014546338 | 98.54536617 |
| 808 | 3.308743801 | 0.00964515 | 99.03548495 |
| 816 | 2.432852873 | 0.007091885 | 99.29081145 |
| 824 | 1.920028652 | 0.005596978 | 99.44030223 |
| 832 | 1.615967633 | 0.004710625 | 99.52893751 |
| 840 | 1.475999223 | 0.00430261 | 99.56973899 |
| 848 | 1.573095383 | 0.00458565 | 99.54143498 |
| 856 | 2.490386929 | 0.0072596 | 99.27403999 |
| 864 | 7.245175297 | 0.021120041 | 97.88799586 |
| 872 | 5.60119034 | 0.016327745 | 98.36722554 |
| 880 | 2.759688355 | 0.008044627 | 99.19553731 |
| 888 | 2.547033278 | 0.007424727 | 99.2575273 |
| 896 | 3.236197988 | 0.009433676 | 99.05663241 |
| 904 | 13.19781836 | 0.038472288 | 96.1527712 |
| 912 | 11.44322871 | 0.033357573 | 96.66424269 |
| 920 | 2.727183363 | 0.007949873 | 99.20501267 |
| 928 | 1.910332803 | 0.005568714 | 99.44312862 |
| 936 | 5.476178431 | 0.015963329 | 98.40366712 |
| 944 | 3.465165018 | 0.010101126 | 98.9898874 |
| 952 | 1.042394869 | 0.003038632 | 99.69613678 |
| 960 | 0.60633246 | 0.001767489 | 99.82325111 |
| 968 | 0.479508605 | 0.001397791 | 99.86022089 |
| 976 | 0.493733513 | 0.001439257 | 99.85607426 |
| 984 | 0.477995761 | 0.001393381 | 99.86066189 |
| 992 | 0.505426419 | 0.001473343 | 99.85266572 |
| 1000 | 0.624275573 | 0.001819794 | 99.81802061 |
| 1008 | 0.882866424 | 0.002573599 | 99.74264011 |
| 1016 | 1.53186761 | 0.004465469 | 99.55345308 |
| 1024 | 3.928633979 | 0.011452161 | 98.85478392 |
| 1032 | 21.1207765 | 0.0615681 | 93.84319004 |
| 1040 | 8.323283654 | 0.02426278 | 97.57372198 |
| 1048 | 2.601724713 | 0.007584155 | 99.24158448 |
| 1056 | 1.749653613 | 0.005100326 | 99.48996739 |
| 1064 | 1.839846999 | 0.005363244 | 99.46367557 |
| 1072 | 2.679961912 | 0.00781222 | 99.21877796 |
| 1080 | 5.847312081 | 0.017045202 | 98.29547984 |
| 1088 | 26.63261054 | 0.077635366 | 92.23646338 |
| 1096 | 15.51925043 | 0.045239376 | 95.47606237 |
| 1104 | 25.53930803 | 0.074448336 | 92.55516642 |
| 1112 | 89.48124427 | 0.260842217 | 73.91577832 |
| 1120 | 16.15604061 | 0.047095651 | 95.29043491 |
| 1128 | 5.451784839 | 0.01589222 | 98.41077797 |
| 1136 | 2.963937917 | 0.008640024 | 99.13599756 |
| 1144 | 2.820765492 | 0.00822267 | 99.17773302 |
| 1152 | 1.486664026 | 0.004333699 | 99.56663014 |
| 1160 | 1.237721489 | 0.003608019 | 99.63919811 |
| 1168 | 1.797994462 | 0.005241242 | 99.47587579 |
| 1176 | 5.239192804 | 0.015272504 | 98.4727496 |
| 1184 | 1.466653415 | 0.004275367 | 99.57246333 |
| 1192 | 0.912816657 | 0.002660905 | 99.73390947 |
| 1200 | 0.885772421 | 0.00258207 | 99.74179299 |
| 1208 | 1.213698918 | 0.003537992 | 99.64620081 |
| 1216 | 2.82124002 | 0.008224053 | 99.17759469 |
| 1224 | 13.06899854 | 0.038096772 | 96.19032281 |
| 1232 | 3.792680104 | 0.011055849 | 98.89441514 |
| 1240 | 1.952768142 | 0.005692415 | 99.43075851 |
| 1248 | 2.153764444 | 0.006278329 | 99.3721671 |
| 1256 | 3.918631662 | 0.011423004 | 98.85769965 |
| 1264 | 14.73383585 | 0.042949854 | 95.70501457 |
| 1272 | 24.36125579 | 0.071014256 | 92.89857443 |
| 1280 | 6.542644865 | 0.019072131 | 98.09278693 |
| 1288 | 7.261992174 | 0.021169063 | 97.88309366 |
| 1296 | 28.73659106 | 0.083768573 | 91.62314273 |
| 1304 | 26.63263058 | 0.077635425 | 92.23645753 |
| 1312 | 6.058367509 | 0.017660438 | 98.23395615 |
| 1320 | 2.909358604 | 0.008480923 | 99.15190769 |
| 1328 | 2.145977214 | 0.006255629 | 99.37443711 |
| 1336 | 2.040235177 | 0.005947386 | 99.40526144 |
| 1344 | 2.417315498 | 0.007046593 | 99.29534067 |
| 1352 | 3.54372766 | 0.01033014 | 98.966986 |
| 1360 | 6.825001462 | 0.019895214 | 98.01047859 |
| 1368 | 21.59780279 | 0.062958655 | 93.70413453 |
| 1376 | 90.39696977 | 0.263511602 | 73.64883985 |
| 1384 | 46.83797044 | 0.136534982 | 86.34650184 |
| 1392 | 18.09864975 | 0.052758452 | 94.72415481 |
| 1400 | 5.972539431 | 0.017410245 | 98.25897546 |
| 1408 | 3.400414124 | 0.009912374 | 99.0087626 |
| 1416 | 2.63897613 | 0.007692745 | 99.23072551 |
| 1424 | 2.671827161 | 0.007788507 | 99.22114928 |
| 1432 | 3.641306382 | 0.010614587 | 98.93854133 |
| 1440 | 7.853075836 | 0.022892101 | 97.71078987 |
| 1448 | 38.03202595 | 0.110865221 | 88.91347786 |
| 1456 | 22.67851556 | 0.066108985 | 93.38910146 |
| 1464 | 7.599929943 | 0.022154169 | 97.78458314 |
| 1472 | 8.249351119 | 0.024047263 | 97.59527368 |
| 1480 | 25.82693666 | 0.075286787 | 92.47132126 |
| 1488 | 63.97153518 | 0.186480163 | 81.35198367 |
| 1496 | 11.72827718 | 0.034188503 | 96.58114967 |
| 1504 | 4.599174736 | 0.01340682 | 98.659318 |
| 1512 | 3.016921505 | 0.008794474 | 99.12055258 |
| 1520 | 3.778922543 | 0.011015745 | 98.89842554 |
| 1528 | 10.83383928 | 0.031581173 | 96.8418827 |
| 1536 | 3.673276191 | 0.01070778 | 98.92922197 |
| 1544 | 4.583641277 | 0.013361539 | 98.66384608 |
| 1552 | 20.17570926 | 0.058813182 | 94.11868177 |
| 1560 | 11.8716339 | 0.034606395 | 96.53936048 |
| 1568 | 2.927006069 | 0.008532366 | 99.14676337 |
| 1576 | 1.356256277 | 0.003953554 | 99.60464464 |
| 1584 | 0.840847853 | 0.002451113 | 99.75488873 |
| 1592 | 0.620208869 | 0.001807939 | 99.81920607 |
| 1600 | 0.534524997 | 0.001558167 | 99.84418334 |
| 1608 | 0.588526275 | 0.001715583 | 99.8284417 |
| 1616 | 1.180637656 | 0.003441617 | 99.65583833 |
| 1624 | 2.916118759 | 0.008500629 | 99.14993708 |
| 1632 | 0.759648264 | 0.002214412 | 99.7785588 |
| 1640 | 0.552075858 | 0.001609328 | 99.83906718 |
| 1648 | 0.721388043 | 0.002102882 | 99.78971185 |
| 1656 | 2.039168014 | 0.005944275 | 99.40557252 |
| 1664 | 10.23844603 | 0.029845572 | 97.01544275 |
| 1672 | 2.210178868 | 0.00644278 | 99.35572202 |
| 1680 | 0.670329169 | 0.001954042 | 99.80459576 |
| 1688 | 0.319959798 | 0.000932699 | 99.90673015 |
| 1696 | 0.192563731 | 0.000561333 | 99.94386673 |
| 1704 | 0.131212995 | 0.000382492 | 99.96175077 |
| 1712 | 0.096626427 | 0.000281671 | 99.97183292 |
| 1720 | 0.057459986 | 0.000167499 | 99.98325013 |
| 1728 | 0.044457425 | 0.000129596 | 99.98704044 |
| 1736 | 0.035454654 | 0.000103352 | 99.98966479 |
| 1744 | 0.028956929 | 8.44109E-05 | 99.99155891 |
| 1752 | 0.024109572 | 7.02806E-05 | 99.99297194 |
| 1760 | 0.020394676 | 5.94515E-05 | 99.99405485 |
| 1768 | 0.017483282 | 5.09646E-05 | 99.99490354 |
| 1776 | 0.015158146 | 4.41867E-05 | 99.99558133 |
| 1784 | 0.011372403 | 3.31511E-05 | 99.99668489 |
| 1792 | 0.009993972 | 2.91329E-05 | 99.99708671 |
| 1800 | 0.008851709 | 2.58032E-05 | 99.99741968 |
| 1808 | 0.007894603 | 2.30132E-05 | 99.99769868 |
| 1816 | 0.007084703 | 2.06523E-05 | 99.99793477 |
| 1824 | 0.006393306 | 1.86368E-05 | 99.99813632 |
| 1832 | 0 | 0 | 100 |
| 1840 | 0 | 0 | 100 |
| 1848 | 0 | 0 | 100 |
| 1856 | 0 | 0 | 100 |
| 1864 | 0 | 0 | 100 |
| 1872 | 0 | 0 | 100 |
| 1880 | 0 | 0 | 100 |
| 1888 | 0 | 0 | 100 |
| 1896 | 0 | 0 | 100 |
| 1904 | 0 | 0 | 100 |
| 1912 | 0 | 0 | 100 |
| 1920 | 0 | 0 | 100 |
| 1928 | 0 | 0 | 100 |
| 1936 | 0 | 0 | 100 |
| 1944 | 0 | 0 | 100 |
| 1952 | 0 | 0 | 100 |
| 1960 | 0 | 0 | 100 |
| 1968 | 0 | 0 | 100 |
| 1976 | 0 | 0 | 100 |
| 1984 | 0 | 0 | 100 |
| 1992 | 0 | 0 | 100 |
| 2000 | 0 | 0 | 100 |
| 2008 | 0 | 0 | 100 |
| 2016 | 0 | 0 | 100 |
| 2024 | 0 | 0 | 100 |
| 2032 | 0 | 0 | 100 |
| 2040 | 0 | 0 | 100 |
| 2048 | 0 | 0 | 100 |
| 2056 | 0 | 0 | 100 |
| 2064 | 0 | 0 | 100 |
| 2072 | 0 | 0 | 100 |
| 2080 | 0 | 0 | 100 |
| 2088 | 0 | 0 | 100 |
| 2096 | 0 | 0 | 100 |
| 2104 | 0 | 0 | 100 |
| 2112 | 0 | 0 | 100 |
| 2120 | 0 | 0 | 100 |
| 2128 | 0 | 0 | 100 |
| 2136 | 0 | 0 | 100 |
| 2144 | 0 | 0 | 100 |
| 2152 | 0 | 0 | 100 |
| 2160 | 0 | 0 | 100 |
| 2168 | 0 | 0 | 100 |
| 2176 | 0 | 0 | 100 |
| 2184 | 0 | 0 | 100 |
| 2192 | 0 | 0 | 100 |
| 2200 | 0 | 0 | 100 |
| 2208 | 0 | 0 | 100 |
| 2216 | 0 | 0 | 100 |
| 2224 | 0 | 0 | 100 |
| 2232 | 0 | 0 | 100 |
| 2240 | 0 | 0 | 100 |
| 2248 | 0 | 0 | 100 |
| 2256 | 0 | 0 | 100 |
| 2264 | 0 | 0 | 100 |
| 2272 | 0 | 0 | 100 |
| 2280 | 0 | 0 | 100 |
| 2288 | 0 | 0 | 100 |
| 2296 | 0 | 0 | 100 |
| 2304 | 0 | 0 | 100 |
| 2312 | 0 | 0 | 100 |
| 2320 | 0 | 0 | 100 |
| 2328 | 0 | 0 | 100 |
| 2336 | 0 | 0 | 100 |
| 2344 | 0 | 0 | 100 |
| 2352 | 0 | 0 | 100 |
| 2360 | 0 | 0 | 100 |
| 2368 | 0 | 0 | 100 |
| 2376 | 0 | 0 | 100 |
| 2384 | 0 | 0 | 100 |
| 2392 | 0 | 0 | 100 |
| 2400 | 0 | 0 | 100 |
| 2408 | 0 | 0 | 100 |
| 2416 | 0 | 0 | 100 |
| 2424 | 0 | 0 | 100 |
| 2432 | 0 | 0 | 100 |
| 2440 | 0 | 0 | 100 |
| 2448 | 0 | 0 | 100 |
| 2456 | 0 | 0 | 100 |
| 2464 | 0 | 0 | 100 |
| 2472 | 0 | 0 | 100 |
| 2480 | 0 | 0 | 100 |
| 2488 | 0 | 0 | 100 |
| 2496 | 0 | 0 | 100 |
| 2504 | 0 | 0 | 100 |
| 2512 | 0 | 0 | 100 |
| 2520 | 0 | 0 | 100 |
| 2528 | 0 | 0 | 100 |
| 2536 | 0 | 0 | 100 |
| 2544 | 0 | 0 | 100 |
| 2552 | 0 | 0 | 100 |
| 2560 | 0 | 0 | 100 |
| 2568 | 0 | 0 | 100 |
| 2576 | 0 | 0 | 100 |
| 2584 | 0 | 0 | 100 |
| 2592 | 0 | 0 | 100 |
| 2600 | 0 | 0 | 100 |
| 2608 | 0 | 0 | 100 |
| 2616 | 0 | 0 | 100 |
| 2624 | 0 | 0 | 100 |
| 2632 | 0 | 0 | 100 |
| 2640 | 0 | 0 | 100 |
| 2648 | 0 | 0 | 100 |
| 2656 | 0 | 0 | 100 |
| 2664 | 0 | 0 | 100 |
| 2672 | 0 | 0 | 100 |
| 2680 | 0 | 0 | 100 |
| 2688 | 0 | 0 | 100 |
| 2696 | 0 | 0 | 100 |
| 2704 | 0 | 0 | 100 |
| 2712 | 0 | 0 | 100 |
| 2720 | 0 | 0 | 100 |
| 2728 | 0 | 0 | 100 |
| 2736 | 0 | 0 | 100 |
| 2744 | 0 | 0 | 100 |
| 2752 | 0 | 0 | 100 |
| 2760 | 0 | 0 | 100 |
| 2768 | 0 | 0 | 100 |
| 2776 | 0 | 0 | 100 |
| 2784 | 0 | 0 | 100 |
| 2792 | 0 | 0 | 100 |
| 2800 | 0 | 0 | 100 |
| 2808 | 0 | 0 | 100 |
| 2816 | 0 | 0 | 100 |
| 2824 | 0 | 0 | 100 |
| 2832 | 0 | 0 | 100 |
| 2840 | 0 | 0 | 100 |
| 2848 | 0 | 0 | 100 |
| 2856 | 0 | 0 | 100 |
| 2864 | 0 | 0 | 100 |
| 2872 | 0 | 0 | 100 |
| 2880 | 0 | 0 | 100 |
| 2888 | 0 | 0 | 100 |
| 2896 | 0 | 0 | 100 |
| 2904 | 0 | 0 | 100 |
| 2912 | 0 | 0 | 100 |
| 2920 | 0 | 0 | 100 |
| 2928 | 0 | 0 | 100 |
| 2936 | 0 | 0 | 100 |
| 2944 | 0 | 0 | 100 |
| 2952 | 0 | 0 | 100 |
| 2960 | 0 | 0 | 100 |
| 2968 | 0 | 0 | 100 |
| 2976 | 0 | 0 | 100 |
| 2984 | 0 | 0 | 100 |
| 2992 | 0 | 0 | 100 |
| 3000 | 0 | 0 | 100 |
| 3008 | 0 | 0 | 100 |
| 3016 | 0.004614299 | 1.34509E-05 | 99.99865491 |
| 3024 | 0.012545876 | 3.65718E-05 | 99.99634282 |
| 3032 | 0.013943464 | 4.06459E-05 | 99.99593541 |
| 3040 | 0.094105795 | 0.000274323 | 99.9725677 |
| 3048 | 0.149865162 | 0.000436864 | 99.95631357 |
| 3056 | 0.167714201 | 0.000488895 | 99.95111049 |
| 3064 | 0.188964534 | 0.000550841 | 99.94491591 |
| 3072 | 0.214542424 | 0.000625402 | 99.93745983 |
| 3080 | 0.245714005 | 0.000716268 | 99.92837316 |
| 3088 | 0.284247678 | 0.000828596 | 99.91714041 |
| 3096 | 0.336296444 | 0.000980321 | 99.90196794 |
| 3104 | 0.39874954 | 0.001162374 | 99.88376255 |
| 3112 | 0.480594265 | 0.001400956 | 99.85990441 |
| 3120 | 0.597776595 | 0.001742548 | 99.82574519 |
| 3128 | 0.752543949 | 0.002193703 | 99.78062975 |
| 3136 | 0.978340138 | 0.002851909 | 99.71480905 |
| 3144 | 1.328472622 | 0.003872563 | 99.61274371 |
| 3152 | 1.921684339 | 0.005601804 | 99.43981959 |
| 3160 | 3.084800709 | 0.008992345 | 99.10076546 |
| 3168 | 6.186556295 | 0.018034115 | 98.19658849 |
| 3176 | 18.56897991 | 0.054129487 | 94.58705126 |
| 3184 | 33.40332016 | 0.097372317 | 90.2627683 |
| 3192 | 120.127017 | 0.350176148 | 64.98238523 |
| 3200 | 60.32719764 | 0.175856741 | 82.41432594 |
| 3208 | 42.94888988 | 0.125198121 | 87.4801879 |
| 3216 | 10.57241677 | 0.030819114 | 96.91808865 |
| 3224 | 4.821173989 | 0.014053959 | 98.59460413 |
| 3232 | 2.950368306 | 0.008600468 | 99.13995316 |
| 3240 | 2.353884361 | 0.006861688 | 99.31383116 |
| 3248 | 3.568982048 | 0.010403758 | 98.95962422 |
| 3256 | 5.187588123 | 0.015122074 | 98.48779261 |
| 3264 | 3.106471863 | 0.009055518 | 99.09444821 |
| 3272 | 10.47667215 | 0.030540013 | 96.94599867 |
| 3280 | 2.926738599 | 0.008531587 | 99.14684134 |
| 3288 | 1.101380068 | 0.003210577 | 99.67894231 |
| 3296 | 0.659981836 | 0.001923879 | 99.80761206 |
| 3304 | 0.472907046 | 0.001378547 | 99.86214528 |
| 3312 | 0.36857591 | 0.001074417 | 99.89255831 |
| 3320 | 0.301015803 | 0.000877476 | 99.91225242 |
| 3328 | 0.253190317 | 0.000738062 | 99.92619378 |
| 3336 | 0.212741626 | 0.000620152 | 99.93798477 |
| 3344 | 0.178148203 | 0.000519311 | 99.94806893 |
| 3352 | 0.156744642 | 0.000456918 | 99.95430817 |
| 3360 | 0.073882859 | 0.000215372 | 99.97846278 |
| 3368 | 0.024433231 | 7.12241E-05 | 99.99287759 |
| 3376 | 0.020953693 | 6.1081E-05 | 99.9938919 |
| 3384 | 0.018170647 | 5.29683E-05 | 99.99470317 |
| 3392 | 0.01590931 | 4.63764E-05 | 99.99536236 |
| 3400 | 0.014046613 | 4.09466E-05 | 99.99590534 |
| 3408 | 0.012493831 | 3.64201E-05 | 99.99635799 |
| 3416 | 0.0078112 | 2.277E-05 | 99.997723 |
| 3424 | 0.00700724 | 2.04264E-05 | 99.99795736 |
| 3432 | 0.006321278 | 1.84268E-05 | 99.99815732 |
| 3440 | 0 | 0 | 100 |
| 3448 | 0 | 0 | 100 |
| 3456 | 0 | 0 | 100 |
| 3464 | 0 | 0 | 100 |
| 3472 | 0 | 0 | 100 |
| 3480 | 0 | 0 | 100 |
| 3488 | 0 | 0 | 100 |
| 3496 | 0 | 0 | 100 |
| 3504 | 0 | 0 | 100 |
| 3512 | 0 | 0 | 100 |
| 3520 | 0 | 0 | 100 |
| 3528 | 0.152948349 | 0.000445852 | 99.95541481 |
| 3536 | 0.16971368 | 0.000494724 | 99.95052763 |
| 3544 | 0.189393802 | 0.000552092 | 99.94479078 |
| 3552 | 0.212705514 | 0.000620047 | 99.9379953 |
| 3560 | 0.240600218 | 0.000701361 | 99.92986386 |
| 3568 | 0.274362446 | 0.00079978 | 99.920022 |
| 3576 | 0.31576022 | 0.000920457 | 99.90795435 |
| 3584 | 0.367280957 | 0.001070642 | 99.8929358 |
| 3592 | 0.43251335 | 0.001260798 | 99.87392024 |
| 3600 | 0.516788303 | 0.001506463 | 99.84935367 |
| 3608 | 0.628300882 | 0.001831528 | 99.81684721 |
| 3616 | 0.780174318 | 0.002274246 | 99.77257536 |
| 3624 | 0.994490143 | 0.002898988 | 99.71010124 |
| 3632 | 1.310752035 | 0.003820906 | 99.61790935 |
| 3640 | 1.805360162 | 0.005262713 | 99.47372866 |
| 3648 | 2.642034082 | 0.007701659 | 99.2298341 |
| 3656 | 4.22491279 | 0.012315828 | 98.7684172 |
| 3664 | 7.782636188 | 0.022686766 | 97.73132337 |
| 3672 | 18.55427912 | 0.054086634 | 94.59133661 |
| 3680 | 77.48606276 | 0.225875674 | 77.41243258 |
| 3688 | 181.1582033 | 0.52808505 | 47.19149503 |
| 3696 | 31.50658742 | 0.091843248 | 90.81567521 |
| 3704 | 10.92136833 | 0.031836324 | 96.81636756 |
| 3712 | 5.405618446 | 0.015757643 | 98.4242357 |
| 3720 | 3.204854288 | 0.009342307 | 99.06576925 |
| 3728 | 2.115661117 | 0.006167256 | 99.38327441 |
| 3736 | 1.499454539 | 0.004370984 | 99.56290165 |
| 3744 | 1.117620955 | 0.00325792 | 99.67420801 |
| 3752 | 0.864893915 | 0.002521208 | 99.74787918 |
| 3760 | 0.689051917 | 0.00200862 | 99.79913799 |
| 3768 | 0.561819022 | 0.00163773 | 99.836227 |
| 3776 | 0.466809682 | 0.001360773 | 99.86392269 |
| 3784 | 0.393999617 | 0.001148528 | 99.88514718 |
| 3792 | 0.336978169 | 0.000982308 | 99.90176921 |
| 3800 | 0.291491318 | 0.000849711 | 99.91502885 |
| 3808 | 0.254626474 | 0.000742249 | 99.92577513 |
| 3816 | 0.224335273 | 0.000653948 | 99.93460517 |
| 3824 | 0.199143246 | 0.000580512 | 99.94194877 |
| 3832 | 0.177967196 | 0.000518783 | 99.94812169 |
| 3840 | 0.159996927 | 0.000466399 | 99.95336011 |
| 3848 | 0 | 0 | 100 |
| 3856 | 0 | 0 | 100 |
| 3864 | 0 | 0 | 100 |
| 3872 | 0 | 0 | 100 |
| 3880 | 0 | 0 | 100 |
| 3888 | 0 | 0 | 100 |
| 3896 | 0 | 0 | 100 |
| 3904 | 0 | 0 | 100 |
| 3912 | 0 | 0 | 100 |
| 3920 | 0 | 0 | 100 |
| 3928 | 0 | 0 | 100 |
| 3936 | 0 | 0 | 100 |
| 3944 | 0 | 0 | 100 |
| 3952 | 0 | 0 | 100 |
| 3960 | 0 | 0 | 100 |
| 3968 | 0 | 0 | 100 |
| 3976 | 0 | 0 | 100 |
| 3984 | 0 | 0 | 100 |
| 3992 | 0 | 0 | 100 |

| Water |  |  |  |
| --- | --- | --- | --- |
| frequency | epsilon | absorbance | Transmittance |
| 0 | 0 | 0 | 100 |
| 8 | 0 | 0 | 100 |
| 16 | 0 | 0 | 100 |
| 24 | 0 | 0 | 100 |
| 32 | 0 | 0 | 100 |
| 40 | 0 | 0 | 100 |
| 48 | 0 | 0 | 100 |
| 56 | 0.061734545 | 0.000111878 | 99.98881222 |
| 64 | 0.068611283 | 0.00012434 | 99.98756599 |
| 72 | 0.076704108 | 0.000139006 | 99.98609938 |
| 80 | 0.086317522 | 0.000156428 | 99.9843572 |
| 88 | 0.098388045 | 0.000178303 | 99.98216973 |
| 96 | 0.112465349 | 0.000203814 | 99.97961858 |
| 104 | 0.129794462 | 0.000235219 | 99.97647813 |
| 112 | 0.15145951 | 0.000274481 | 99.97255191 |
| 120 | 0.179036935 | 0.000324458 | 99.96755422 |
| 128 | 0.214890148 | 0.000389432 | 99.96105676 |
| 136 | 0.262692305 | 0.000476061 | 99.95239386 |
| 144 | 0.328403582 | 0.000595146 | 99.9404854 |
| 152 | 0.422216999 | 0.000765158 | 99.92348416 |
| 160 | 0.56274527 | 0.001019829 | 99.89801707 |
| 168 | 0.786957712 | 0.001426156 | 99.8573844 |
| 176 | 1.176989999 | 0.002132988 | 99.78670121 |
| 184 | 1.94636735 | 0.003527284 | 99.64727159 |
| 192 | 3.798736043 | 0.00688422 | 99.31157799 |
| 200 | 10.19036984 | 0.018467392 | 98.15326077 |
| 208 | 53.81831729 | 0.097531688 | 90.24683116 |
| 216 | 40.43075053 | 0.073270209 | 92.67297908 |
| 224 | 8.604640647 | 0.015593671 | 98.44063291 |
| 232 | 3.811906627 | 0.006908088 | 99.30919117 |
| 240 | 2.663549384 | 0.00482699 | 99.51730102 |
| 248 | 1.842021697 | 0.003338185 | 99.66618152 |
| 256 | 1.297959265 | 0.002352213 | 99.76477868 |
| 264 | 1.112024227 | 0.002015254 | 99.79847456 |
| 272 | 1.05096831 | 0.001904606 | 99.80953936 |
| 280 | 1.050886155 | 0.001904458 | 99.80955424 |
| 288 | 1.10253505 | 0.001998058 | 99.80019423 |
| 296 | 1.203065187 | 0.002180242 | 99.78197576 |
| 304 | 1.3582333 | 0.002461444 | 99.75385558 |
| 312 | 1.582545768 | 0.002867952 | 99.71320478 |
| 320 | 1.902710974 | 0.003448168 | 99.65518317 |
| 328 | 2.365897478 | 0.004287573 | 99.57124268 |
| 336 | 3.057859875 | 0.005541575 | 99.44584251 |
| 344 | 4.144987012 | 0.00751171 | 99.24882902 |
| 352 | 5.983015543 | 0.010842658 | 98.9157342 |
| 360 | 9.445693567 | 0.01711786 | 98.28821396 |
| 368 | 17.17192036 | 0.031119635 | 96.88803651 |
| 376 | 40.27428585 | 0.072986658 | 92.70133423 |
| 384 | 165.5067298 | 0.299937858 | 70.0062142 |
| 392 | 388.5383544 | 0.704124611 | 29.5875389 |
| 400 | 112.0025131 | 0.202975395 | 79.70246049 |
| 408 | 35.78920834 | 0.064858622 | 93.51413776 |
| 416 | 15.4930892 | 0.028077191 | 97.19228095 |
| 424 | 11.27230954 | 0.020428126 | 97.95718737 |
| 432 | 15.93842006 | 0.028884237 | 97.11157632 |
| 440 | 5.514603423 | 0.009993783 | 99.0006217 |
| 448 | 3.306662786 | 0.005992465 | 99.40075346 |
| 456 | 2.403305767 | 0.004355366 | 99.5644634 |
| 464 | 1.856570431 | 0.003364551 | 99.66354495 |
| 472 | 1.494166267 | 0.002707787 | 99.72922126 |
| 480 | 1.238317204 | 0.002244128 | 99.77558725 |
| 488 | 1.050897316 | 0.001904478 | 99.80955222 |
| 496 | 0.910661378 | 0.001650337 | 99.83496633 |
| 504 | 0.804992382 | 0.001458839 | 99.85411609 |
| 512 | 0.726405122 | 0.00131642 | 99.86835798 |
| 520 | 0.671244812 | 0.001216456 | 99.87835435 |
| 528 | 0.640629915 | 0.001160975 | 99.88390251 |
| 536 | 0.65026872 | 0.001178443 | 99.88215572 |
| 544 | 0.837620383 | 0.001517969 | 99.84820311 |
| 552 | 0.693608624 | 0.001256985 | 99.8743015 |
| 560 | 0.497222889 | 0.000901087 | 99.9098913 |
| 568 | 0.803791691 | 0.001456663 | 99.85433368 |
| 576 | 1.502988148 | 0.002723775 | 99.72762253 |
| 584 | 4.201398719 | 0.007613941 | 99.23860587 |
| 592 | 3.093996625 | 0.005607063 | 99.43929366 |
| 600 | 5.682400853 | 0.010297872 | 98.97021279 |
| 608 | 23.59683164 | 0.042763114 | 95.72368861 |
| 616 | 32.94372721 | 0.059701929 | 94.02980714 |
| 624 | 7.294202044 | 0.013218842 | 98.67811578 |
| 632 | 3.597560394 | 0.006519642 | 99.34803584 |
| 640 | 2.741310098 | 0.004967911 | 99.50320891 |
| 648 | 2.592318726 | 0.004697903 | 99.53020972 |
| 656 | 2.758748454 | 0.004999513 | 99.50004867 |
| 664 | 3.161389979 | 0.005729196 | 99.42708037 |
| 672 | 3.832164914 | 0.006944801 | 99.30551988 |
| 680 | 4.899259106 | 0.008878632 | 99.11213684 |
| 688 | 6.666015294 | 0.012080417 | 98.79195828 |
| 696 | 9.904921606 | 0.017950092 | 98.20499083 |
| 704 | 17.09106076 | 0.030973098 | 96.90269021 |
| 712 | 40.66198425 | 0.07368926 | 92.63107399 |
| 720 | 197.0341714 | 0.357073138 | 64.29268623 |
| 728 | 104.5065119 | 0.189390844 | 81.06091556 |
| 736 | 89.20323023 | 0.161657631 | 83.83423694 |
| 744 | 364.7807727 | 0.66107018 | 33.89298205 |
| 752 | 310.8601954 | 0.563353172 | 43.66468285 |
| 760 | 89.89225838 | 0.162906315 | 83.70936852 |
| 768 | 172.139189 | 0.311957463 | 68.80425366 |
| 776 | 57.46755458 | 0.104144981 | 89.58550191 |
| 784 | 20.15778375 | 0.036530735 | 96.34692651 |
| 792 | 11.05125835 | 0.020027529 | 97.99724714 |
| 800 | 7.250923746 | 0.013140412 | 98.68595885 |
| 808 | 5.235879253 | 0.009488668 | 99.0511332 |
| 816 | 4.028404381 | 0.007300434 | 99.26995659 |
| 824 | 3.261081558 | 0.005909861 | 99.40901387 |
| 832 | 2.786238757 | 0.005049332 | 99.49506677 |
| 840 | 2.626028756 | 0.004758993 | 99.52410066 |
| 848 | 3.72975788 | 0.006759215 | 99.32407849 |
| 856 | 3.349748101 | 0.006070546 | 99.39294537 |
| 864 | 2.933385052 | 0.005315997 | 99.46840033 |
| 872 | 3.062177041 | 0.005549399 | 99.44506014 |
| 880 | 5.993490687 | 0.010861641 | 98.91383585 |
| 888 | 6.688259209 | 0.012120729 | 98.78792715 |
| 896 | 11.5124218 | 0.020863267 | 97.91367328 |
| 904 | 56.02824636 | 0.10153661 | 89.84633905 |
| 912 | 13.18068893 | 0.023886567 | 97.61134329 |
| 920 | 4.55032224 | 0.008246274 | 99.17537256 |
| 928 | 4.154905038 | 0.007529684 | 99.24703164 |
| 936 | 14.16202463 | 0.025664983 | 97.43350174 |
| 944 | 4.778171795 | 0.008659192 | 99.13408076 |
| 952 | 1.911820632 | 0.003464677 | 99.65353228 |
| 960 | 1.383600759 | 0.002507416 | 99.74925838 |
| 968 | 1.531215951 | 0.00277493 | 99.72250697 |
| 976 | 1.310306085 | 0.002374589 | 99.76254114 |
| 984 | 1.436133586 | 0.002602618 | 99.73973818 |
| 992 | 1.812500169 | 0.003284685 | 99.67153153 |
| 1000 | 2.602416671 | 0.004716203 | 99.52837973 |
| 1008 | 4.504734989 | 0.008163659 | 99.18363406 |
| 1016 | 11.0356156 | 0.01999918 | 98.00008199 |
| 1024 | 56.02988897 | 0.101539586 | 89.84604137 |
| 1032 | 36.35219308 | 0.065878886 | 93.41211144 |
| 1040 | 9.558516417 | 0.017322322 | 98.26776776 |
| 1048 | 5.735254015 | 0.010393655 | 98.96063453 |
| 1056 | 5.695098435 | 0.010320883 | 98.96791168 |
| 1064 | 8.214656104 | 0.014886925 | 98.51130745 |
| 1072 | 18.14135043 | 0.032876475 | 96.71235255 |
| 1080 | 79.3568731 | 0.143813672 | 85.61863281 |
| 1088 | 65.41208747 | 0.118542378 | 88.14576216 |
| 1096 | 227.6932179 | 0.412634677 | 58.73653227 |
| 1104 | 45.48030048 | 0.082421204 | 91.75787962 |
| 1112 | 14.33993934 | 0.025987407 | 97.40125934 |
| 1120 | 7.008067883 | 0.012700298 | 98.72997015 |
| 1128 | 4.332998754 | 0.007852432 | 99.21475679 |
| 1136 | 3.141845032 | 0.005693776 | 99.43062239 |
| 1144 | 2.415534236 | 0.004377527 | 99.56224731 |
| 1152 | 2.452658229 | 0.004444804 | 99.55551955 |
| 1160 | 5.727983027 | 0.010380478 | 98.9619522 |
| 1168 | 2.562176412 | 0.004643278 | 99.53567223 |
| 1176 | 1.511871155 | 0.002739873 | 99.72601271 |
| 1184 | 1.303404409 | 0.002362081 | 99.76379189 |
| 1192 | 1.257906696 | 0.002279628 | 99.77203716 |
| 1200 | 1.484965071 | 0.002691113 | 99.73088874 |
| 1208 | 2.457906616 | 0.004454316 | 99.55456842 |
| 1216 | 8.532827868 | 0.015463529 | 98.4536471 |
| 1224 | 3.617627939 | 0.006556009 | 99.34439912 |
| 1232 | 3.150583091 | 0.005709612 | 99.42903884 |
| 1240 | 4.343645877 | 0.007871727 | 99.21282727 |
| 1248 | 8.157351384 | 0.014783076 | 98.52169244 |
| 1256 | 27.09022035 | 0.049093971 | 95.09060286 |
| 1264 | 78.66619856 | 0.142562004 | 85.74379959 |
| 1272 | 18.99028312 | 0.034414944 | 96.5585056 |
| 1280 | 19.01945394 | 0.034467809 | 96.55321915 |
| 1288 | 70.4551778 | 0.127681667 | 87.23183333 |
| 1296 | 80.88384184 | 0.146580905 | 85.34190948 |
| 1304 | 17.45129494 | 0.031625929 | 96.83740714 |
| 1312 | 8.10938684 | 0.014696152 | 98.53038476 |
| 1320 | 5.853882027 | 0.010608637 | 98.93913629 |
| 1328 | 5.457072698 | 0.009889524 | 99.01104765 |
| 1336 | 6.26933305 | 0.011361534 | 98.86384661 |
| 1344 | 8.690526652 | 0.015749317 | 98.4250683 |
| 1352 | 14.92071736 | 0.027039916 | 97.29600844 |
| 1360 | 35.72488535 | 0.064742054 | 93.52579463 |
| 1368 | 167.2384105 | 0.303076078 | 69.69239216 |
| 1376 | 229.6247133 | 0.41613501 | 58.38649901 |
| 1384 | 55.62156442 | 0.100799604 | 89.92003956 |
| 1392 | 19.44002348 | 0.035229981 | 96.47700187 |
| 1400 | 10.86303777 | 0.019686428 | 98.03135722 |
| 1408 | 8.201917014 | 0.014863839 | 98.51361608 |
| 1416 | 8.342596456 | 0.015118784 | 98.48812159 |
| 1424 | 12.67630278 | 0.022972499 | 97.70275015 |
| 1432 | 39.64928302 | 0.071854003 | 92.81459973 |
| 1440 | 99.79439048 | 0.180851351 | 81.91486488 |
| 1448 | 21.37063475 | 0.038728712 | 96.12712884 |
| 1456 | 12.88155148 | 0.023344458 | 97.66555417 |
| 1464 | 17.36973234 | 0.031478118 | 96.85218824 |
| 1472 | 50.85462372 | 0.092160765 | 90.78392345 |
| 1480 | 213.0961107 | 0.386181221 | 61.38187791 |
| 1488 | 40.67719107 | 0.073716818 | 92.62831815 |
| 1496 | 14.26283814 | 0.025847681 | 97.41523192 |
| 1504 | 9.28322969 | 0.016823437 | 98.31765631 |
| 1512 | 14.87089979 | 0.026949634 | 97.30503658 |
| 1520 | 15.45205584 | 0.028002828 | 97.19971717 |
| 1528 | 11.21610071 | 0.020326262 | 97.96737376 |
| 1536 | 33.10973103 | 0.060002767 | 93.99972327 |
| 1544 | 69.28072395 | 0.125553275 | 87.44467251 |
| 1552 | 12.96486161 | 0.023495436 | 97.65045637 |
| 1560 | 5.031081662 | 0.009117526 | 99.08824743 |
| 1568 | 2.805553934 | 0.005084336 | 99.49156639 |
| 1576 | 1.882706552 | 0.003411915 | 99.65880845 |
| 1584 | 1.428064444 | 0.002587995 | 99.7412005 |
| 1592 | 1.221293966 | 0.002213277 | 99.77867227 |
| 1600 | 1.224941802 | 0.002219888 | 99.77801119 |
| 1608 | 2.644107087 | 0.004791756 | 99.52082443 |
| 1616 | 3.574336555 | 0.006477554 | 99.35224456 |
| 1624 | 1.228186427 | 0.002225768 | 99.77742319 |
| 1632 | 1.041404209 | 0.001887274 | 99.8112726 |
| 1640 | 1.338411046 | 0.002425522 | 99.75744784 |
| 1648 | 3.778468287 | 0.00684749 | 99.315251 |
| 1656 | 18.64161795 | 0.033783079 | 96.62169208 |
| 1664 | 3.982199923 | 0.007216701 | 99.27832994 |
| 1672 | 1.233432139 | 0.002235275 | 99.77647254 |
| 1680 | 0.601447695 | 0.001089967 | 99.89100326 |
| 1688 | 0.37012148 | 0.000670749 | 99.93292512 |
| 1696 | 0.257669136 | 0.000466958 | 99.95330418 |
| 1704 | 0.13777305 | 0.000249678 | 99.97503222 |
| 1712 | 0.102304376 | 0.0001854 | 99.98146 |
| 1720 | 0.079056261 | 0.000143269 | 99.98567311 |
| 1728 | 0.062977301 | 0.00011413 | 99.988587 |
| 1736 | 0.051384599 | 9.31212E-05 | 99.99068788 |
| 1744 | 0.042744952 | 7.74641E-05 | 99.99225359 |
| 1752 | 0.03612989 | 6.5476E-05 | 99.9934524 |
| 1760 | 0.030950087 | 5.6089E-05 | 99.9943911 |
| 1768 | 0.02681663 | 4.85982E-05 | 99.99514018 |
| 1776 | 0.020608453 | 3.73475E-05 | 99.99626525 |
| 1784 | 0.018111889 | 3.28231E-05 | 99.99671769 |
| 1792 | 0.016042845 | 2.90735E-05 | 99.99709265 |
| 1800 | 0.014309023 | 2.59314E-05 | 99.99740686 |
| 1808 | 0.012841748 | 2.32723E-05 | 99.99767277 |
| 1816 | 0.011589067 | 2.10022E-05 | 99.99789978 |
| 1824 | 0 | 0 | 100 |
| 1832 | 0 | 0 | 100 |
| 1840 | 0 | 0 | 100 |
| 1848 | 0 | 0 | 100 |
| 1856 | 0 | 0 | 100 |
| 1864 | 0 | 0 | 100 |
| 1872 | 0 | 0 | 100 |
| 1880 | 0 | 0 | 100 |
| 1888 | 0 | 0 | 100 |
| 1896 | 0 | 0 | 100 |
| 1904 | 0 | 0 | 100 |
| 1912 | 0 | 0 | 100 |
| 1920 | 0 | 0 | 100 |
| 1928 | 0 | 0 | 100 |
| 1936 | 0 | 0 | 100 |
| 1944 | 0 | 0 | 100 |
| 1952 | 0 | 0 | 100 |
| 1960 | 0 | 0 | 100 |
| 1968 | 0 | 0 | 100 |
| 1976 | 0 | 0 | 100 |
| 1984 | 0 | 0 | 100 |
| 1992 | 0 | 0 | 100 |
| 2000 | 0 | 0 | 100 |
| 2008 | 0 | 0 | 100 |
| 2016 | 0 | 0 | 100 |
| 2024 | 0 | 0 | 100 |
| 2032 | 0 | 0 | 100 |
| 2040 | 0 | 0 | 100 |
| 2048 | 0 | 0 | 100 |
| 2056 | 0 | 0 | 100 |
| 2064 | 0 | 0 | 100 |
| 2072 | 0 | 0 | 100 |
| 2080 | 0 | 0 | 100 |
| 2088 | 0 | 0 | 100 |
| 2096 | 0 | 0 | 100 |
| 2104 | 0 | 0 | 100 |
| 2112 | 0 | 0 | 100 |
| 2120 | 0 | 0 | 100 |
| 2128 | 0 | 0 | 100 |
| 2136 | 0 | 0 | 100 |
| 2144 | 0 | 0 | 100 |
| 2152 | 0 | 0 | 100 |
| 2160 | 0 | 0 | 100 |
| 2168 | 0 | 0 | 100 |
| 2176 | 0 | 0 | 100 |
| 2184 | 0 | 0 | 100 |
| 2192 | 0 | 0 | 100 |
| 2200 | 0 | 0 | 100 |
| 2208 | 0 | 0 | 100 |
| 2216 | 0 | 0 | 100 |
| 2224 | 0 | 0 | 100 |
| 2232 | 0 | 0 | 100 |
| 2240 | 0 | 0 | 100 |
| 2248 | 0 | 0 | 100 |
| 2256 | 0 | 0 | 100 |
| 2264 | 0 | 0 | 100 |
| 2272 | 0 | 0 | 100 |
| 2280 | 0 | 0 | 100 |
| 2288 | 0 | 0 | 100 |
| 2296 | 0 | 0 | 100 |
| 2304 | 0 | 0 | 100 |
| 2312 | 0 | 0 | 100 |
| 2320 | 0 | 0 | 100 |
| 2328 | 0 | 0 | 100 |
| 2336 | 0 | 0 | 100 |
| 2344 | 0 | 0 | 100 |
| 2352 | 0 | 0 | 100 |
| 2360 | 0 | 0 | 100 |
| 2368 | 0 | 0 | 100 |
| 2376 | 0 | 0 | 100 |
| 2384 | 0 | 0 | 100 |
| 2392 | 0 | 0 | 100 |
| 2400 | 0 | 0 | 100 |
| 2408 | 0 | 0 | 100 |
| 2416 | 0 | 0 | 100 |
| 2424 | 0 | 0 | 100 |
| 2432 | 0 | 0 | 100 |
| 2440 | 0 | 0 | 100 |
| 2448 | 0 | 0 | 100 |
| 2456 | 0 | 0 | 100 |
| 2464 | 0 | 0 | 100 |
| 2472 | 0 | 0 | 100 |
| 2480 | 0 | 0 | 100 |
| 2488 | 0 | 0 | 100 |
| 2496 | 0 | 0 | 100 |
| 2504 | 0 | 0 | 100 |
| 2512 | 0 | 0 | 100 |
| 2520 | 0 | 0 | 100 |
| 2528 | 0 | 0 | 100 |
| 2536 | 0 | 0 | 100 |
| 2544 | 0 | 0 | 100 |
| 2552 | 0 | 0 | 100 |
| 2560 | 0 | 0 | 100 |
| 2568 | 0 | 0 | 100 |
| 2576 | 0 | 0 | 100 |
| 2584 | 0 | 0 | 100 |
| 2592 | 0 | 0 | 100 |
| 2600 | 0 | 0 | 100 |
| 2608 | 0 | 0 | 100 |
| 2616 | 0 | 0 | 100 |
| 2624 | 0 | 0 | 100 |
| 2632 | 0 | 0 | 100 |
| 2640 | 0 | 0 | 100 |
| 2648 | 0 | 0 | 100 |
| 2656 | 0 | 0 | 100 |
| 2664 | 0 | 0 | 100 |
| 2672 | 0 | 0 | 100 |
| 2680 | 0 | 0 | 100 |
| 2688 | 0 | 0 | 100 |
| 2696 | 0 | 0 | 100 |
| 2704 | 0 | 0 | 100 |
| 2712 | 0 | 0 | 100 |
| 2720 | 0 | 0 | 100 |
| 2728 | 0 | 0 | 100 |
| 2736 | 0 | 0 | 100 |
| 2744 | 0 | 0 | 100 |
| 2752 | 0 | 0 | 100 |
| 2760 | 0 | 0 | 100 |
| 2768 | 0 | 0 | 100 |
| 2776 | 0 | 0 | 100 |
| 2784 | 0 | 0 | 100 |
| 2792 | 0 | 0 | 100 |
| 2800 | 0 | 0 | 100 |
| 2808 | 0 | 0 | 100 |
| 2816 | 0 | 0 | 100 |
| 2824 | 0 | 0 | 100 |
| 2832 | 0 | 0 | 100 |
| 2840 | 0 | 0 | 100 |
| 2848 | 0 | 0 | 100 |
| 2856 | 0 | 0 | 100 |
| 2864 | 0 | 0 | 100 |
| 2872 | 0 | 0 | 100 |
| 2880 | 0 | 0 | 100 |
| 2888 | 0 | 0 | 100 |
| 2896 | 0 | 0 | 100 |
| 2904 | 0 | 0 | 100 |
| 2912 | 0 | 0 | 100 |
| 2920 | 0 | 0 | 100 |
| 2928 | 0 | 0 | 100 |
| 2936 | 0 | 0 | 100 |
| 2944 | 0 | 0 | 100 |
| 2952 | 0 | 0 | 100 |
| 2960 | 0 | 0 | 100 |
| 2968 | 0 | 0 | 100 |
| 2976 | 0 | 0 | 100 |
| 2984 | 0 | 0 | 100 |
| 2992 | 0 | 0 | 100 |
| 3000 | 0 | 0 | 100 |
| 3008 | 0 | 0 | 100 |
| 3016 | 0 | 0 | 100 |
| 3024 | 0.003457708 | 6.26619E-06 | 99.99937338 |
| 3032 | 0.026318 | 4.76945E-05 | 99.99523055 |
| 3040 | 0.123948331 | 0.000224624 | 99.97753759 |
| 3048 | 0.187060694 | 0.000338999 | 99.96610012 |
| 3056 | 0.209180541 | 0.000379085 | 99.96209147 |
| 3064 | 0.235479188 | 0.000426745 | 99.95732553 |
| 3072 | 0.267082755 | 0.000484018 | 99.9515982 |
| 3080 | 0.305525312 | 0.000553685 | 99.94463149 |
| 3088 | 0.361038921 | 0.000654289 | 99.9345711 |
| 3096 | 0.421342662 | 0.000763574 | 99.92364261 |
| 3104 | 0.498264137 | 0.000902974 | 99.9097026 |
| 3112 | 0.598584457 | 0.001084778 | 99.89152215 |
| 3120 | 0.733965795 | 0.001330122 | 99.86698781 |
| 3128 | 0.920164814 | 0.001667559 | 99.83324408 |
| 3136 | 1.189017589 | 0.002154785 | 99.78452152 |
| 3144 | 1.599344939 | 0.002898396 | 99.71016037 |
| 3152 | 2.276068111 | 0.004124781 | 99.58752191 |
| 3160 | 3.533545278 | 0.006403631 | 99.35963691 |
| 3168 | 6.451796029 | 0.011692201 | 98.83077994 |
| 3176 | 17.1417735 | 0.031065002 | 96.89349984 |
| 3184 | 49.32326551 | 0.089385577 | 91.06144226 |
| 3192 | 113.168451 | 0.205088354 | 79.49116461 |
| 3200 | 91.48600389 | 0.165794564 | 83.42054364 |
| 3208 | 51.34230878 | 0.093044568 | 90.69554323 |
| 3216 | 13.2636296 | 0.024036875 | 97.59631246 |
| 3224 | 6.262725127 | 0.011349559 | 98.86504412 |
| 3232 | 4.180719487 | 0.007576466 | 99.24235344 |
| 3240 | 4.889271925 | 0.008860532 | 99.11394676 |
| 3248 | 14.5363039 | 0.026343266 | 97.36567337 |
| 3256 | 3.776021903 | 0.006843057 | 99.31569434 |
| 3264 | 1.936197288 | 0.003508853 | 99.64911465 |
| 3272 | 2.496361047 | 0.004524004 | 99.54759955 |
| 3280 | 1.071435857 | 0.001941699 | 99.80583015 |
| 3288 | 0.699070355 | 0.001266883 | 99.8733117 |
| 3296 | 0.539199103 | 0.000977158 | 99.9022842 |
| 3304 | 0.439856862 | 0.000797126 | 99.9202874 |
| 3312 | 0.369464192 | 0.000669558 | 99.93304423 |
| 3320 | 0.31632777 | 0.000573262 | 99.94267383 |
| 3328 | 0.274671744 | 0.000497771 | 99.9502229 |
| 3336 | 0.241159477 | 0.000437039 | 99.95629612 |
| 3344 | 0.210756795 | 0.000381942 | 99.96180582 |
| 3352 | 0.168914127 | 0.000306113 | 99.96938871 |
| 3360 | 0.068515452 | 0.000124166 | 99.98758336 |
| 3368 | 0.01682339 | 3.0488E-05 | 99.9969512 |
| 3376 | 0.014723238 | 2.6682E-05 | 99.9973318 |
| 3384 | 0.012994918 | 2.35499E-05 | 99.99764501 |
| 3392 | 0.011555168 | 2.09407E-05 | 99.99790593 |
| 3400 | 0.010342894 | 1.87438E-05 | 99.99812562 |
| 3408 | 0.001238332 | 2.24415E-06 | 99.99977558 |
| 3416 | 0.00110464 | 2.00187E-06 | 99.99979981 |
| 3424 | 0.00099148 | 1.7968E-06 | 99.99982032 |
| 3432 | 0.000894855 | 1.62169E-06 | 99.99983783 |
| 3440 | 0 | 0 | 100 |
| 3448 | 0 | 0 | 100 |
| 3456 | 0 | 0 | 100 |
| 3464 | 0 | 0 | 100 |
| 3472 | 0 | 0 | 100 |
| 3480 | 0.496270403 | 0.000899361 | 99.91006391 |
| 3488 | 0.550770244 | 0.000998128 | 99.90018723 |
| 3496 | 0.61476402 | 0.0011141 | 99.88859003 |
| 3504 | 0.690591333 | 0.001251517 | 99.8748483 |
| 3512 | 0.781359238 | 0.00141601 | 99.85839898 |
| 3520 | 0.891265289 | 0.001615186 | 99.83848137 |
| 3528 | 1.026091023 | 0.001859523 | 99.81404772 |
| 3536 | 1.193976944 | 0.002163772 | 99.78362276 |
| 3544 | 1.406678498 | 0.002549239 | 99.74507615 |
| 3552 | 1.681676868 | 0.003047601 | 99.69523985 |
| 3560 | 2.045879647 | 0.003707624 | 99.62923758 |
| 3568 | 2.542441401 | 0.004607513 | 99.53924869 |
| 3576 | 3.244111176 | 0.005879107 | 99.41208931 |
| 3584 | 4.281341843 | 0.007758817 | 99.22411826 |
| 3592 | 5.907194323 | 0.010705252 | 98.92947482 |
| 3600 | 8.666167922 | 0.015705173 | 98.42948269 |
| 3608 | 13.91012308 | 0.025208477 | 97.47915234 |
| 3616 | 25.78542042 | 0.046729361 | 95.32706387 |
| 3624 | 62.24401304 | 0.112801068 | 88.71989316 |
| 3632 | 267.1881981 | 0.484209046 | 51.57909536 |
| 3640 | 551.8033779 | 0.99999996 | 4.00208E-06 |
| 3648 | 97.32852188 | 0.176382606 | 82.36173937 |
| 3656 | 34.3295746 | 0.062213416 | 93.77865838 |
| 3664 | 17.13003231 | 0.031043724 | 96.89562763 |
| 3672 | 10.20228157 | 0.018488979 | 98.15110208 |
| 3680 | 6.754463116 | 0.012240706 | 98.77592941 |
| 3688 | 4.796717409 | 0.008692801 | 99.13071985 |
| 3696 | 3.580453447 | 0.00648864 | 99.35113603 |
| 3704 | 2.773884759 | 0.005026944 | 99.49730561 |
| 3712 | 2.21185631 | 0.004008414 | 99.59915863 |
| 3720 | 1.804711102 | 0.003270569 | 99.6729431 |
| 3728 | 1.500387786 | 0.002719062 | 99.72809378 |
| 3736 | 1.266983763 | 0.002296078 | 99.77039218 |
| 3744 | 1.084068993 | 0.001964593 | 99.80354072 |
| 3752 | 0.938070805 | 0.001700009 | 99.82999909 |
| 3760 | 0.819687321 | 0.00148547 | 99.85145301 |
| 3768 | 0.722371188 | 0.00130911 | 99.86908903 |
| 3776 | 0.641405964 | 0.001162381 | 99.88376187 |
| 3784 | 0.573324533 | 0.001039001 | 99.89609985 |
| 3792 | 0.515532127 | 0.000934268 | 99.90657322 |
| 3800 | 0 | 0 | 100 |
| 3808 | 0 | 0 | 100 |
| 3816 | 0 | 0 | 100 |
| 3824 | 0 | 0 | 100 |
| 3832 | 0 | 0 | 100 |
| 3840 | 0 | 0 | 100 |
| 3848 | 0 | 0 | 100 |
| 3856 | 0 | 0 | 100 |
| 3864 | 0 | 0 | 100 |
| 3872 | 0 | 0 | 100 |
| 3880 | 0 | 0 | 100 |
| 3888 | 0 | 0 | 100 |
| 3896 | 0 | 0 | 100 |
| 3904 | 0 | 0 | 100 |
| 3912 | 0 | 0 | 100 |
| 3920 | 0 | 0 | 100 |
| 3928 | 0 | 0 | 100 |
| 3936 | 0 | 0 | 100 |
| 3944 | 0 | 0 | 100 |
| 3952 | 0 | 0 | 100 |
| 3960 | 0 | 0 | 100 |
| 3968 | 0 | 0 | 100 |
| 3976 | 0 | 0 | 100 |
| 3984 | 0 | 0 | 100 |
| 3992 | 0 | 0 | 100 |

| Acetonitrile |  |  |  |
| --- | --- | --- | --- |
| Frequency | Epsilon | Absorbance | Transmittance (%) |
| 0 | 0 | 0 | 100 |
| 8 | 0 | 0 | 100 |
| 16 | 0 | 0 | 100 |
| 24 | 0 | 0 | 100 |
| 32 | 0 | 0 | 100 |
| 40 | 0 | 0 | 100 |
| 48 | 0 | 0 | 100 |
| 56 | 0.050472286 | 0.000075796 | 99.9924204 |
| 64 | 0.056006423 | 0.000084107 | 99.9915893 |
| 72 | 0.062503018 | 0.000093863 | 99.9906137 |
| 80 | 0.070198837 | 0.000105421 | 99.98945795 |
| 88 | 0.080737733 | 0.000121247 | 99.98787528 |
| 96 | 0.092031033 | 0.000138207 | 99.98617932 |
| 104 | 0.105871844 | 0.000158992 | 99.98410079 |
| 112 | 0.123088411 | 0.000184847 | 99.9815153 |
| 120 | 0.14487513 | 0.000217565 | 99.9782435 |
| 128 | 0.173005426 | 0.000259809 | 99.97401906 |
| 136 | 0.210204296 | 0.000315672 | 99.96843275 |
| 144 | 0.260833494 | 0.000391704 | 99.96082955 |
| 152 | 0.33222921 | 0.000498922 | 99.95010776 |
| 160 | 0.437511194 | 0.000657029 | 99.93429713 |
| 168 | 0.602046756 | 0.000904119 | 99.90958814 |
| 176 | 0.880192256 | 0.001321821 | 99.86781788 |
| 184 | 1.406157747 | 0.002111685 | 99.78883147 |
| 192 | 2.58829061 | 0.003886943 | 99.61130568 |
| 200 | 6.171231725 | 0.009267594 | 99.07324057 |
| 208 | 25.84196243 | 0.038807945 | 96.11920547 |
| 216 | 59.23013989 | 0.088948354 | 91.10516457 |
| 224 | 10.38446334 | 0.015594779 | 98.44052213 |
| 232 | 3.754138597 | 0.005637745 | 99.43622546 |
| 240 | 2.50656185 | 0.003764208 | 99.62357922 |
| 248 | 2.535518631 | 0.003807693 | 99.61923067 |
| 256 | 0.989031452 | 0.001485269 | 99.85147305 |
| 264 | 0.920531068 | 0.0013824 | 99.86176004 |
| 272 | 0.786893097 | 0.00118171 | 99.881829 |
| 280 | 0.769288147 | 0.001155272 | 99.88447281 |
| 288 | 0.759175802 | 0.001140086 | 99.88599143 |
| 296 | 0.780407031 | 0.00117197 | 99.88280304 |
| 304 | 0.828882698 | 0.001244767 | 99.87552325 |
| 312 | 0.904975712 | 0.00135904 | 99.86409605 |
| 320 | 1.012620146 | 0.001520694 | 99.84793064 |
| 328 | 1.159677411 | 0.001741536 | 99.82584644 |
| 336 | 1.359454118 | 0.002041549 | 99.79584514 |
| 344 | 1.633953557 | 0.002453776 | 99.75462243 |
| 352 | 2.0205202 | 0.003034299 | 99.69657011 |
| 360 | 2.586203195 | 0.003883808 | 99.61161915 |
| 368 | 3.462377384 | 0.005199596 | 99.48004045 |
| 376 | 4.895890864 | 0.007352362 | 99.26476379 |
| 384 | 7.814827969 | 0.011735851 | 98.82641492 |
| 392 | 15.79198166 | 0.023715473 | 97.62845271 |
| 400 | 57.29193975 | 0.086037679 | 91.39623211 |
| 408 | 50.19461923 | 0.075379339 | 92.46206613 |
| 416 | 156.3077804 | 0.234733868 | 76.5266132 |
| 424 | 354.6968159 | 0.5326629 | 46.73371002 |
| 432 | 85.91437919 | 0.129021182 | 87.09788182 |
| 440 | 59.72906573 | 0.089697612 | 91.0302388 |
| 448 | 17.80339763 | 0.0267361 | 97.32639004 |
| 456 | 9.048971774 | 0.013589216 | 98.64107843 |
| 464 | 5.62741107 | 0.008450916 | 99.15490837 |
| 472 | 3.883132418 | 0.005831461 | 99.41685392 |
| 480 | 2.861888514 | 0.004297817 | 99.57021835 |
| 488 | 2.210831432 | 0.003320097 | 99.66799029 |
| 496 | 1.771482385 | 0.002660308 | 99.73396915 |
| 504 | 1.463488487 | 0.002197781 | 99.78022187 |
| 512 | 1.242854712 | 0.001866446 | 99.81335536 |
| 520 | 1.084835266 | 0.001629142 | 99.83708579 |
| 528 | 0.977446758 | 0.001467872 | 99.85321277 |
| 536 | 0.926490808 | 0.00139135 | 99.86086504 |
| 544 | 1.047669843 | 0.001573329 | 99.84266708 |
| 552 | 1.166809931 | 0.001752247 | 99.82477532 |
| 560 | 0.940526119 | 0.001412427 | 99.8587573 |
| 568 | 1.027246025 | 0.001542658 | 99.84573421 |
| 576 | 1.643407754 | 0.002467973 | 99.75320265 |
| 584 | 4.141338651 | 0.00621922 | 99.37807802 |
| 592 | 3.047328506 | 0.004576299 | 99.54237006 |
| 600 | 5.174477102 | 0.007770727 | 99.22292734 |
| 608 | 17.76019835 | 0.026671225 | 97.33287745 |
| 616 | 50.64050791 | 0.076048948 | 92.39510518 |
| 624 | 9.652851217 | 0.014496086 | 98.55039135 |
| 632 | 4.081655605 | 0.006129591 | 99.38704087 |
| 640 | 2.792038435 | 0.00419292 | 99.58070802 |
| 648 | 2.448214393 | 0.003676585 | 99.6323415 |
| 656 | 2.46691735 | 0.003704672 | 99.6295328 |
| 664 | 2.706880257 | 0.004065034 | 99.59349658 |
| 672 | 3.153448642 | 0.004735664 | 99.52643356 |
| 680 | 3.863518796 | 0.005802006 | 99.41979938 |
| 688 | 4.984238864 | 0.007485038 | 99.25149621 |
| 696 | 6.853233582 | 0.010291785 | 98.97082153 |
| 704 | 10.35382078 | 0.015548762 | 98.44512385 |
| 712 | 18.52927826 | 0.027826185 | 97.21738154 |
| 720 | 49.25027802 | 0.073961182 | 92.60388176 |
| 728 | 213.3327884 | 0.320370684 | 67.96293156 |
| 736 | 78.07940558 | 0.117255077 | 88.27449226 |
| 744 | 133.6918664 | 0.200770613 | 79.92293867 |
| 752 | 665.8936386 | 1.000000058 | -5.79334E-06 |
| 760 | 164.4035057 | 0.246891554 | 75.3108446 |
| 768 | 85.35484796 | 0.128180911 | 87.18190895 |
| 776 | 161.3882916 | 0.242363482 | 75.76365178 |
| 784 | 40.5913047 | 0.060957644 | 93.90423565 |
| 792 | 16.31609328 | 0.024502553 | 97.54974469 |
| 800 | 9.464277634 | 0.014212898 | 98.57871023 |
| 808 | 6.404642498 | 0.009618117 | 99.03818831 |
| 816 | 4.724844562 | 0.007095495 | 99.29045052 |
| 824 | 3.701389252 | 0.00555853 | 99.44414705 |
| 832 | 3.052635676 | 0.004584269 | 99.54157306 |
| 840 | 2.670828633 | 0.004010894 | 99.5989106 |
| 848 | 2.620999481 | 0.003936063 | 99.60639365 |
| 856 | 4.076563314 | 0.006121944 | 99.3878056 |
| 864 | 3.370665005 | 0.005061867 | 99.49381328 |
| 872 | 5.119174033 | 0.007687676 | 99.23123243 |
| 880 | 7.010973966 | 0.01052867 | 98.947133 |
| 888 | 6.946679903 | 0.010432117 | 98.95678831 |
| 896 | 10.92117338 | 0.016400778 | 98.35992216 |
| 904 | 53.92316718 | 0.080978654 | 91.90213464 |
| 912 | 14.2022438 | 0.021328098 | 97.86719022 |
| 920 | 4.363502802 | 0.006552853 | 99.34471471 |
| 928 | 2.90337083 | 0.004360112 | 99.56398878 |
| 936 | 4.730644358 | 0.007104205 | 99.28957954 |
| 944 | 14.91209443 | 0.02239411 | 97.76058901 |
| 952 | 3.360255583 | 0.005046235 | 99.4953765 |
| 960 | 1.660304936 | 0.002493349 | 99.75066513 |
| 968 | 1.320107211 | 0.00198246 | 99.80175403 |
| 976 | 1.416364492 | 0.002127013 | 99.78729868 |
| 984 | 1.468866373 | 0.002205857 | 99.77941425 |
| 992 | 1.809304087 | 0.002717107 | 99.72828931 |
| 1000 | 2.601412692 | 0.003906649 | 99.60933508 |
| 1008 | 4.561352549 | 0.006849972 | 99.31500279 |
| 1016 | 11.473216 | 0.017229804 | 98.27701963 |
| 1024 | 60.08193132 | 0.090227525 | 90.97724752 |
| 1032 | 34.35927792 | 0.051598751 | 94.84012492 |
| 1040 | 8.981008654 | 0.013487153 | 98.65128473 |
| 1048 | 5.054181321 | 0.007590073 | 99.24099266 |
| 1056 | 4.512942823 | 0.006777273 | 99.32227268 |
| 1064 | 5.675305089 | 0.008522841 | 99.14771593 |
| 1072 | 10.22814026 | 0.015360022 | 98.46399781 |
| 1080 | 37.08564402 | 0.055693048 | 94.43069523 |
| 1088 | 34.35877664 | 0.051597998 | 94.8402002 |
| 1096 | 81.39475852 | 0.12223388 | 87.77661198 |
| 1104 | 206.9369503 | 0.310765789 | 68.92342106 |
| 1112 | 36.41264138 | 0.054682372 | 94.53176282 |
| 1120 | 12.81582174 | 0.01924605 | 98.07539497 |
| 1128 | 6.669226144 | 0.010015453 | 98.99845469 |
| 1136 | 4.342456839 | 0.006521247 | 99.34787527 |
| 1144 | 3.055648368 | 0.004588794 | 99.54112063 |
| 1152 | 2.77997545 | 0.004174804 | 99.58251957 |
| 1160 | 5.537337698 | 0.008315649 | 99.16843506 |
| 1168 | 2.860400662 | 0.004295582 | 99.57044179 |
| 1176 | 1.675581122 | 0.00251629 | 99.74837104 |
| 1184 | 1.442119834 | 0.002165691 | 99.78343089 |
| 1192 | 1.408306487 | 0.002114912 | 99.78850878 |
| 1200 | 1.697040874 | 0.002548517 | 99.74514834 |
| 1208 | 2.758675533 | 0.004142817 | 99.58571827 |
| 1216 | 9.377853692 | 0.014083111 | 98.59168887 |
| 1224 | 11.79033973 | 0.017706042 | 98.22939585 |
| 1232 | 4.048448058 | 0.006079722 | 99.39202779 |
| 1240 | 3.714794444 | 0.005578661 | 99.44213393 |
| 1248 | 5.434860736 | 0.008161755 | 99.18382445 |
| 1256 | 12.99735634 | 0.019518668 | 98.04813316 |
| 1264 | 64.9509907 | 0.097539593 | 90.2460407 |
| 1272 | 22.93480041 | 0.03444214 | 96.55578603 |
| 1280 | 15.12432809 | 0.02271283 | 97.72871701 |
| 1288 | 39.46093984 | 0.059260128 | 94.07398722 |
| 1296 | 133.3959404 | 0.200326209 | 79.96737911 |
| 1304 | 24.76911286 | 0.037196803 | 96.28031973 |
| 1312 | 9.437289151 | 0.014172368 | 98.5827632 |
| 1320 | 6.083437892 | 0.009135751 | 99.08642493 |
| 1328 | 5.27200351 | 0.007917186 | 99.2082814 |
| 1336 | 5.753865728 | 0.008640818 | 99.13591815 |
| 1344 | 7.673168094 | 0.011523114 | 98.84768857 |
| 1352 | 12.73841036 | 0.019129798 | 98.08702015 |
| 1360 | 29.40684182 | 0.044161472 | 95.58385276 |
| 1368 | 131.886567 | 0.19805952 | 80.19404797 |
| 1376 | 178.4185674 | 0.267938553 | 73.20614473 |
| 1384 | 78.29424526 | 0.117577711 | 88.2422289 |
| 1392 | 21.63398394 | 0.03248865 | 96.75113503 |
| 1400 | 10.98891422 | 0.016502508 | 98.34974924 |
| 1408 | 7.75629797 | 0.011647954 | 98.83520461 |
| 1416 | 7.131135987 | 0.010709122 | 98.92908777 |
| 1424 | 8.73004171 | 0.013110265 | 98.68897348 |
| 1432 | 15.84781148 | 0.023799315 | 97.62006851 |
| 1440 | 59.55365435 | 0.089434189 | 91.05658106 |
| 1448 | 96.14736792 | 0.144388485 | 85.56115152 |
| 1456 | 23.74995788 | 0.035666295 | 96.43337045 |
| 1464 | 20.13742664 | 0.030241208 | 96.97587923 |
| 1472 | 49.07315454 | 0.073695189 | 92.63048113 |
| 1480 | 219.5771252 | 0.329748064 | 67.02519363 |
| 1488 | 44.39846781 | 0.066675018 | 93.33249819 |
| 1496 | 15.03148045 | 0.022573397 | 97.74266032 |
| 1504 | 9.134545604 | 0.013717725 | 98.62822745 |
| 1512 | 10.75322466 | 0.016148563 | 98.38514371 |
| 1520 | 25.75303996 | 0.038674407 | 96.13255932 |
| 1528 | 13.38450101 | 0.02010006 | 97.98999405 |
| 1536 | 40.60394024 | 0.060976619 | 93.90233812 |
| 1544 | 44.36302974 | 0.066621799 | 93.33782007 |
| 1552 | 9.57512299 | 0.014379359 | 98.56206412 |
| 1560 | 4.152430345 | 0.006235877 | 99.37641234 |
| 1568 | 2.46784564 | 0.003706066 | 99.6293934 |
| 1576 | 1.733727225 | 0.00260361 | 99.739639 |
| 1584 | 1.371650921 | 0.002059865 | 99.7940135 |
| 1592 | 1.235024555 | 0.001854688 | 99.81453125 |
| 1600 | 1.416748523 | 0.00212759 | 99.78724101 |
| 1608 | 3.107178643 | 0.004666179 | 99.53338211 |
| 1616 | 5.969136145 | 0.008964099 | 99.1035901 |
| 1624 | 1.6009992 | 0.002404287 | 99.75957132 |
| 1632 | 1.15594867 | 0.001735936 | 99.8264064 |
| 1640 | 1.398197871 | 0.002099732 | 99.79002683 |
| 1648 | 3.878621621 | 0.005824687 | 99.41753133 |
| 1656 | 18.8111822 | 0.028249531 | 97.17504685 |
| 1664 | 3.955471333 | 0.005940095 | 99.40599049 |
| 1672 | 1.233106552 | 0.001851807 | 99.81481928 |
| 1680 | 0.600524709 | 0.000901833 | 99.90981672 |
| 1688 | 0.368674753 | 0.000553654 | 99.94463459 |
| 1696 | 0.255755688 | 0.000384079 | 99.96159211 |
| 1704 | 0.143336589 | 0.000215254 | 99.97847455 |
| 1712 | 0.10697557 | 0.00016065 | 99.98393504 |
| 1720 | 0.083030414 | 0.00012469 | 99.98753098 |
| 1728 | 0.066398378 | 9.97132E-05 | 99.99002868 |
| 1736 | 0.054360096 | 8.16348E-05 | 99.99183652 |
| 1744 | 0.045356437 | 6.81136E-05 | 99.99318864 |
| 1752 | 0.038440264 | 5.77273E-05 | 99.99422727 |
| 1760 | 0.033008583 | 4.95704E-05 | 99.99504296 |
| 1768 | 0.028662319 | 4.30434E-05 | 99.99569566 |
| 1776 | 0.020732189 | 3.11344E-05 | 99.99688656 |
| 1784 | 0.018222079 | 2.73649E-05 | 99.99726351 |
| 1792 | 0.016141575 | 2.42405E-05 | 99.99757595 |
| 1800 | 0.014397978 | 2.1622E-05 | 99.9978378 |
| 1808 | 0.0129223 | 1.9406E-05 | 99.9980594 |
| 1816 | 0.011662345 | 1.75138E-05 | 99.99824862 |
| 1824 | 0 | 0 | 100 |
| 1832 | 0 | 0 | 100 |
| 1840 | 0 | 0 | 100 |
| 1848 | 0 | 0 | 100 |
| 1856 | 0 | 0 | 100 |
| 1864 | 0 | 0 | 100 |
| 1872 | 0 | 0 | 100 |
| 1880 | 0 | 0 | 100 |
| 1888 | 0 | 0 | 100 |
| 1896 | 0 | 0 | 100 |
| 1904 | 0 | 0 | 100 |
| 1912 | 0 | 0 | 100 |
| 1920 | 0 | 0 | 100 |
| 1928 | 0 | 0 | 100 |
| 1936 | 0 | 0 | 100 |
| 1944 | 0 | 0 | 100 |
| 1952 | 0 | 0 | 100 |
| 1960 | 0 | 0 | 100 |
| 1968 | 0 | 0 | 100 |
| 1976 | 0 | 0 | 100 |
| 1984 | 0 | 0 | 100 |
| 1992 | 0 | 0 | 100 |
| 2000 | 0 | 0 | 100 |
| 2008 | 0 | 0 | 100 |
| 2016 | 0 | 0 | 100 |
| 2024 | 0 | 0 | 100 |
| 2032 | 0 | 0 | 100 |
| 2040 | 0 | 0 | 100 |
| 2048 | 0 | 0 | 100 |
| 2056 | 0 | 0 | 100 |
| 2064 | 0 | 0 | 100 |
| 2072 | 0 | 0 | 100 |
| 2080 | 0 | 0 | 100 |
| 2088 | 0 | 0 | 100 |
| 2096 | 0 | 0 | 100 |
| 2104 | 0 | 0 | 100 |
| 2112 | 0 | 0 | 100 |
| 2120 | 0 | 0 | 100 |
| 2128 | 0 | 0 | 100 |
| 2136 | 0 | 0 | 100 |
| 2144 | 0 | 0 | 100 |
| 2152 | 0 | 0 | 100 |
| 2160 | 0 | 0 | 100 |
| 2168 | 0 | 0 | 100 |
| 2176 | 0 | 0 | 100 |
| 2184 | 0 | 0 | 100 |
| 2192 | 0 | 0 | 100 |
| 2200 | 0 | 0 | 100 |
| 2208 | 0 | 0 | 100 |
| 2216 | 0 | 0 | 100 |
| 2224 | 0 | 0 | 100 |
| 2232 | 0 | 0 | 100 |
| 2240 | 0 | 0 | 100 |
| 2248 | 0 | 0 | 100 |
| 2256 | 0 | 0 | 100 |
| 2264 | 0 | 0 | 100 |
| 2272 | 0 | 0 | 100 |
| 2280 | 0 | 0 | 100 |
| 2288 | 0 | 0 | 100 |
| 2296 | 0 | 0 | 100 |
| 2304 | 0 | 0 | 100 |
| 2312 | 0 | 0 | 100 |
| 2320 | 0 | 0 | 100 |
| 2328 | 0 | 0 | 100 |
| 2336 | 0 | 0 | 100 |
| 2344 | 0 | 0 | 100 |
| 2352 | 0 | 0 | 100 |
| 2360 | 0 | 0 | 100 |
| 2368 | 0 | 0 | 100 |
| 2376 | 0 | 0 | 100 |
| 2384 | 0 | 0 | 100 |
| 2392 | 0 | 0 | 100 |
| 2400 | 0 | 0 | 100 |
| 2408 | 0 | 0 | 100 |
| 2416 | 0 | 0 | 100 |
| 2424 | 0 | 0 | 100 |
| 2432 | 0 | 0 | 100 |
| 2440 | 0 | 0 | 100 |
| 2448 | 0 | 0 | 100 |
| 2456 | 0 | 0 | 100 |
| 2464 | 0 | 0 | 100 |
| 2472 | 0 | 0 | 100 |
| 2480 | 0 | 0 | 100 |
| 2488 | 0 | 0 | 100 |
| 2496 | 0 | 0 | 100 |
| 2504 | 0 | 0 | 100 |
| 2512 | 0 | 0 | 100 |
| 2520 | 0 | 0 | 100 |
| 2528 | 0 | 0 | 100 |
| 2536 | 0 | 0 | 100 |
| 2544 | 0 | 0 | 100 |
| 2552 | 0 | 0 | 100 |
| 2560 | 0 | 0 | 100 |
| 2568 | 0 | 0 | 100 |
| 2576 | 0 | 0 | 100 |
| 2584 | 0 | 0 | 100 |
| 2592 | 0 | 0 | 100 |
| 2600 | 0 | 0 | 100 |
| 2608 | 0 | 0 | 100 |
| 2616 | 0 | 0 | 100 |
| 2624 | 0 | 0 | 100 |
| 2632 | 0 | 0 | 100 |
| 2640 | 0 | 0 | 100 |
| 2648 | 0 | 0 | 100 |
| 2656 | 0 | 0 | 100 |
| 2664 | 0 | 0 | 100 |
| 2672 | 0 | 0 | 100 |
| 2680 | 0 | 0 | 100 |
| 2688 | 0 | 0 | 100 |
| 2696 | 0 | 0 | 100 |
| 2704 | 0 | 0 | 100 |
| 2712 | 0 | 0 | 100 |
| 2720 | 0 | 0 | 100 |
| 2728 | 0 | 0 | 100 |
| 2736 | 0 | 0 | 100 |
| 2744 | 0 | 0 | 100 |
| 2752 | 0 | 0 | 100 |
| 2760 | 0 | 0 | 100 |
| 2768 | 0 | 0 | 100 |
| 2776 | 0 | 0 | 100 |
| 2784 | 0 | 0 | 100 |
| 2792 | 0 | 0 | 100 |
| 2800 | 0 | 0 | 100 |
| 2808 | 0 | 0 | 100 |
| 2816 | 0 | 0 | 100 |
| 2824 | 0 | 0 | 100 |
| 2832 | 0 | 0 | 100 |
| 2840 | 0 | 0 | 100 |
| 2848 | 0 | 0 | 100 |
| 2856 | 0 | 0 | 100 |
| 2864 | 0 | 0 | 100 |
| 2872 | 0 | 0 | 100 |
| 2880 | 0 | 0 | 100 |
| 2888 | 0 | 0 | 100 |
| 2896 | 0 | 0 | 100 |
| 2904 | 0 | 0 | 100 |
| 2912 | 0 | 0 | 100 |
| 2920 | 0 | 0 | 100 |
| 2928 | 0 | 0 | 100 |
| 2936 | 0 | 0 | 100 |
| 2944 | 0 | 0 | 100 |
| 2952 | 0 | 0 | 100 |
| 2960 | 0 | 0 | 100 |
| 2968 | 0 | 0 | 100 |
| 2976 | 0 | 0 | 100 |
| 2984 | 0 | 0 | 100 |
| 2992 | 0 | 0 | 100 |
| 3000 | 0 | 0 | 100 |
| 3008 | 0 | 0 | 100 |
| 3016 | 0 | 0 | 100 |
| 3024 | 0.003538929 | 0.000005315 | 99.9994685 |
| 3032 | 0.027381457 | 0.000041119 | 99.9958881 |
| 3040 | 0.128232766 | 0.000192572 | 99.98074275 |
| 3048 | 0.192935323 | 0.000289739 | 99.9710261 |
| 3056 | 0.215697549 | 0.000323922 | 99.96760781 |
| 3064 | 0.242748696 | 0.000364546 | 99.96354542 |
| 3072 | 0.275241097 | 0.000413341 | 99.9586659 |
| 3080 | 0.314743086 | 0.000472663 | 99.95273373 |
| 3088 | 0.363433883 | 0.000545784 | 99.94542163 |
| 3096 | 0.432910088 | 0.000650119 | 99.9349881 |
| 3104 | 0.51167404 | 0.000768402 | 99.92315979 |
| 3112 | 0.615612695 | 0.000924491 | 99.90755089 |
| 3120 | 0.753041651 | 0.001130874 | 99.88691262 |
| 3128 | 0.942973585 | 0.001416102 | 99.85838975 |
| 3136 | 1.216547495 | 0.00182694 | 99.81730602 |
| 3144 | 1.632606339 | 0.002451753 | 99.75482474 |
| 3152 | 2.314949613 | 0.003476456 | 99.65235443 |
| 3160 | 3.569865074 | 0.005361014 | 99.46389858 |
| 3168 | 6.409749383 | 0.009625786 | 99.03742139 |
| 3176 | 16.53847281 | 0.02483651 | 97.51634904 |
| 3184 | 47.36457378 | 0.071129342 | 92.88706577 |
| 3192 | 110.8399992 | 0.166453018 | 83.35469822 |
| 3200 | 99.29861944 | 0.14912085 | 85.08791503 |
| 3208 | 53.77832489 | 0.080761138 | 91.92388621 |
| 3216 | 13.86986097 | 0.020828945 | 97.91710553 |
| 3224 | 6.485744968 | 0.009739912 | 99.02600881 |
| 3232 | 4.173985908 | 0.006268248 | 99.37317525 |
| 3240 | 4.142445356 | 0.006220882 | 99.37791182 |
| 3248 | 12.14866678 | 0.018244156 | 98.17558439 |
| 3256 | 5.032638946 | 0.007557722 | 99.24422776 |
| 3264 | 2.315310703 | 0.003476998 | 99.6523002 |
| 3272 | 3.230683565 | 0.004851651 | 99.51483487 |
| 3280 | 1.217844735 | 0.001828888 | 99.81711121 |
| 3288 | 0.76172596 | 0.001143915 | 99.88560846 |
| 3296 | 0.576763087 | 0.000866149 | 99.9133851 |
| 3304 | 0.466076367 | 0.000699926 | 99.93000738 |
| 3312 | 0.389333327 | 0.000584678 | 99.9415322 |
| 3320 | 0.332160477 | 0.000498819 | 99.95011809 |
| 3328 | 0.287717895 | 0.000432078 | 99.95679221 |
| 3336 | 0.252168946 | 0.000378693 | 99.96213074 |
| 3344 | 0.22009267 | 0.000330522 | 99.96694777 |
| 3352 | 0.175903035 | 0.000264161 | 99.97358391 |
| 3360 | 0.071138184 | 0.000106831 | 99.98931688 |
| 3368 | 0.017997541 | 2.70277E-05 | 99.99729723 |
| 3376 | 0.015701356 | 2.35794E-05 | 99.99764206 |
| 3384 | 0.01382016 | 2.07543E-05 | 99.99792457 |
| 3392 | 0.01225921 | 1.84102E-05 | 99.99815898 |
| 3400 | 0.010949453 | 1.64432E-05 | 99.99835568 |
| 3408 | 0.009839561 | 1.47765E-05 | 99.99852235 |
| 3416 | 0.001615542 | 2.42613E-06 | 99.99975739 |
| 3424 | 0.001450463 | 2.17822E-06 | 99.99978218 |
| 3432 | 0 | 0 | 100 |
| 3440 | 0 | 0 | 100 |
| 3448 | 0 | 0 | 100 |
| 3456 | 0 | 0 | 100 |
| 3464 | 0 | 0 | 100 |
| 3472 | 0 | 0 | 100 |
| 3480 | 0 | 0 | 100 |
| 3488 | 0.491957468 | 0.000738793 | 99.92612071 |
| 3496 | 0.546995311 | 0.000821446 | 99.91785545 |
| 3504 | 0.611810758 | 0.000918782 | 99.90812184 |
| 3512 | 0.68886399 | 0.001034496 | 99.89655044 |
| 3520 | 0.781440281 | 0.001173521 | 99.88264788 |
| 3528 | 0.894005633 | 0.001342565 | 99.86574347 |
| 3536 | 1.032754885 | 0.001550931 | 99.84490692 |
| 3544 | 1.206481205 | 0.001811823 | 99.81881772 |
| 3552 | 1.428001657 | 0.002144489 | 99.78555108 |
| 3560 | 1.716585421 | 0.002577867 | 99.74221326 |
| 3568 | 2.102278783 | 0.003157079 | 99.68429209 |
| 3576 | 2.634027987 | 0.003955629 | 99.60443711 |
| 3584 | 3.395943333 | 0.005099829 | 99.49001712 |
| 3592 | 4.542538861 | 0.006821719 | 99.31782812 |
| 3600 | 6.383113863 | 0.009585786 | 99.04142135 |
| 3608 | 9.612111948 | 0.014434907 | 98.55650934 |
| 3616 | 16.06235071 | 0.024121497 | 97.58785026 |
| 3624 | 31.91901656 | 0.047934109 | 95.20658908 |
| 3632 | 88.88017115 | 0.133475034 | 86.65249656 |
| 3640 | 494.354427 | 0.742392519 | 25.76074811 |
| 3648 | 274.3863434 | 0.412057337 | 58.79426632 |
| 3656 | 62.04986064 | 0.093182846 | 90.68171542 |
| 3664 | 25.35653418 | 0.038078958 | 96.19210424 |
| 3672 | 13.58529889 | 0.020401606 | 97.9598394 |
| 3680 | 8.429548635 | 0.012659002 | 98.73409977 |
| 3688 | 5.73060758 | 0.008605891 | 99.13941092 |
| 3696 | 4.145546169 | 0.006225538 | 99.37744616 |
| 3704 | 3.13682357 | 0.004710698 | 99.52893021 |
| 3712 | 2.455706178 | 0.003687836 | 99.63121643 |
| 3720 | 1.974389129 | 0.002965022 | 99.70349781 |
| 3728 | 1.621779539 | 0.002435494 | 99.75645065 |
| 3736 | 1.355789935 | 0.002036046 | 99.79639541 |
| 3744 | 1.150221086 | 0.001727335 | 99.82726654 |
| 3752 | 0.988075232 | 0.001483834 | 99.85161665 |
| 3760 | 0.857935189 | 0.001288397 | 99.87116032 |
| 3768 | 0.751902507 | 0.001129163 | 99.88708369 |
| 3776 | 0.664372358 | 0.000997715 | 99.90022845 |
| 3784 | 0.591278533 | 0.000887947 | 99.91120525 |
| 3792 | 0.529613186 | 0.000795342 | 99.92046579 |
| 3800 | 0.47711275 | 0.0007165 | 99.92835 |
| 3808 | 0 | 0 | 100 |
| 3816 | 0 | 0 | 100 |
| 3824 | 0 | 0 | 100 |
| 3832 | 0 | 0 | 100 |
| 3840 | 0 | 0 | 100 |
| 3848 | 0 | 0 | 100 |
| 3856 | 0 | 0 | 100 |
| 3864 | 0 | 0 | 100 |
| 3872 | 0 | 0 | 100 |
| 3880 | 0 | 0 | 100 |
| 3888 | 0 | 0 | 100 |
| 3896 | 0 | 0 | 100 |
| 3904 | 0 | 0 | 100 |
| 3912 | 0 | 0 | 100 |
| 3920 | 0 | 0 | 100 |
| 3928 | 0 | 0 | 100 |
| 3936 | 0 | 0 | 100 |
| 3944 | 0 | 0 | 100 |
| 3952 | 0 | 0 | 100 |
| 3960 | 0 | 0 | 100 |
| 3968 | 0 | 0 | 100 |
| 3976 | 0 | 0 | 100 |
| 3984 | 0 | 0 | 100 |
| 3992 | 0 | 0 | 100 |

| Toluene |  |  |  |
| --- | --- | --- | --- |
| Frequency | Epsilon | Absorbance | Transmittance(%) |
| 0 | 0 | 0 | 100 |
| 8 | 0 | 0 | 100 |
| 16 | 0 | 0 | 100 |
| 24 | 0 | 0 | 100 |
| 32 | 0 | 0 | 100 |
| 40 | 0 | 0 | 100 |
| 48 | 0 | 0 | 100 |
| 56 | 0.036712806 | 9.11739E-05 | 99.99088261 |
| 64 | 0.040698414 | 0.000101072 | 99.98989281 |
| 72 | 0.045369924 | 0.000112673 | 99.98873267 |
| 80 | 0.050894201 | 0.000126393 | 99.98736075 |
| 88 | 0.058101293 | 0.000144291 | 99.98557091 |
| 96 | 0.066136619 | 0.000164246 | 99.98357539 |
| 104 | 0.075961992 | 0.000188647 | 99.98113532 |
| 112 | 0.088151413 | 0.000218918 | 99.97810815 |
| 120 | 0.103528804 | 0.000257107 | 99.97428928 |
| 128 | 0.123310876 | 0.000306235 | 99.96937652 |
| 136 | 0.149355154 | 0.000370914 | 99.96290859 |
| 144 | 0.184611824 | 0.000458472 | 99.95415282 |
| 152 | 0.233995707 | 0.000581114 | 99.94188865 |
| 160 | 0.306191336 | 0.000760407 | 99.92395932 |
| 168 | 0.417731591 | 0.00103741 | 99.896259 |
| 176 | 0.603310916 | 0.001498284 | 99.85017155 |
| 184 | 0.946099629 | 0.002349579 | 99.76504214 |
| 192 | 1.688008822 | 0.004192063 | 99.58079369 |
| 200 | 3.786267787 | 0.009402956 | 99.05970436 |
| 208 | 13.80262911 | 0.034277956 | 96.57220441 |
| 216 | 55.8176561 | 0.138619617 | 86.13803833 |
| 224 | 9.944958342 | 0.024697675 | 97.53023253 |
| 232 | 3.182316155 | 0.007903081 | 99.20969192 |
| 240 | 1.966111892 | 0.004882714 | 99.51172855 |
| 248 | 1.898535543 | 0.004714893 | 99.52851071 |
| 256 | 0.973056229 | 0.002416524 | 99.75834764 |
| 264 | 0.752096264 | 0.001867783 | 99.81322165 |
| 272 | 0.669064915 | 0.00166158 | 99.83384196 |
| 280 | 0.652831457 | 0.001621266 | 99.83787344 |
| 288 | 0.664982369 | 0.001651442 | 99.83485584 |
| 296 | 0.706985345 | 0.001755753 | 99.82442466 |
| 304 | 0.778705747 | 0.001933866 | 99.80661336 |
| 312 | 0.884821771 | 0.002197399 | 99.78026011 |
| 320 | 1.035327079 | 0.002571169 | 99.74288307 |
| 328 | 1.247936384 | 0.003099171 | 99.6900829 |
| 336 | 1.553482328 | 0.003857975 | 99.61420249 |
| 344 | 2.007556792 | 0.00498564 | 99.50143597 |
| 352 | 2.717245374 | 0.006748107 | 99.32518931 |
| 360 | 3.909514835 | 0.009709033 | 99.02909673 |
| 368 | 6.134964444 | 0.015235796 | 98.4764204 |
| 376 | 10.98783994 | 0.027287605 | 97.27123948 |
| 384 | 25.19893639 | 0.062579964 | 93.74200361 |
| 392 | 97.11714221 | 0.241184277 | 75.8815723 |
| 400 | 308.8188593 | 0.766932095 | 23.30679054 |
| 408 | 59.37903598 | 0.147464078 | 85.25359217 |
| 416 | 19.38324434 | 0.048137061 | 95.18629393 |
| 424 | 11.31746764 | 0.028106215 | 97.18937853 |
| 432 | 18.20583003 | 0.045213027 | 95.47869732 |
| 440 | 6.236067201 | 0.015486878 | 98.45131217 |
| 448 | 3.186786137 | 0.007914182 | 99.20858183 |
| 456 | 2.151429116 | 0.005342938 | 99.46570619 |
| 464 | 1.591277605 | 0.003951837 | 99.60481628 |
| 472 | 1.24143625 | 0.003083028 | 99.69169716 |
| 480 | 1.004351307 | 0.002494243 | 99.75057571 |
| 488 | 0.835757182 | 0.00207555 | 99.79244499 |
| 496 | 0.712285023 | 0.001768915 | 99.82310852 |
| 504 | 0.620520726 | 0.001541024 | 99.8458976 |
| 512 | 0.552524672 | 0.00137216 | 99.86278399 |
| 520 | 0.503931026 | 0.001251481 | 99.87485192 |
| 528 | 0.473758299 | 0.001176549 | 99.88234512 |
| 536 | 0.468322053 | 0.001163048 | 99.88369518 |
| 544 | 0.541494976 | 0.001344769 | 99.86552315 |
| 552 | 0.769603896 | 0.001911263 | 99.80887374 |
| 560 | 0.356151212 | 0.000884479 | 99.9115521 |
| 568 | 0.453094629 | 0.001125232 | 99.88747682 |
| 576 | 0.942680071 | 0.002341086 | 99.76589137 |
| 584 | 3.288613751 | 0.008167064 | 99.18329359 |
| 592 | 2.39665439 | 0.00595194 | 99.40480605 |
| 600 | 3.326842506 | 0.008262003 | 99.17379972 |
| 608 | 10.95072162 | 0.027195424 | 97.28045758 |
| 616 | 31.21429138 | 0.077518717 | 92.24812826 |
| 624 | 6.125817251 | 0.015213079 | 98.47869205 |
| 632 | 2.604312625 | 0.006467646 | 99.35323544 |
| 640 | 1.802856743 | 0.004477281 | 99.55227194 |
| 648 | 1.59636086 | 0.003964461 | 99.60355388 |
| 656 | 1.618323995 | 0.004019005 | 99.59809948 |
| 664 | 1.780960051 | 0.004422902 | 99.55770984 |
| 672 | 2.076060297 | 0.005155764 | 99.48442356 |
| 680 | 2.540565621 | 0.006309334 | 99.36906661 |
| 688 | 3.268505738 | 0.008117127 | 99.18828728 |
| 696 | 4.473984301 | 0.011110857 | 98.88891431 |
| 704 | 6.712854482 | 0.016670949 | 98.33290507 |
| 712 | 11.88516688 | 0.02951606 | 97.04839402 |
| 720 | 30.92514366 | 0.076800637 | 92.31993627 |
| 728 | 137.1764067 | 0.340668925 | 65.93310745 |
| 736 | 50.31855062 | 0.124962936 | 87.50370638 |
| 744 | 77.14526303 | 0.191585379 | 80.84146211 |
| 752 | 402.6678448 | 1.000000111 | -1.11369E-05 |
| 760 | 141.6708365 | 0.351830557 | 64.81694427 |
| 768 | 50.99252436 | 0.126636707 | 87.33632926 |
| 776 | 80.39811982 | 0.199663643 | 80.03363571 |
| 784 | 42.35167071 | 0.105177694 | 89.48223059 |
| 792 | 13.41580178 | 0.033317295 | 96.66827052 |
| 800 | 7.187871868 | 0.017850625 | 98.21493751 |
| 808 | 4.707622108 | 0.011691082 | 98.83089184 |
| 816 | 3.418060082 | 0.008488536 | 99.15114641 |
| 824 | 2.658284923 | 0.006601682 | 99.33983176 |
| 832 | 2.192293734 | 0.005444423 | 99.45555772 |
| 840 | 1.93799005 | 0.004812876 | 99.51871243 |
| 848 | 1.960841019 | 0.004869625 | 99.51303754 |
| 856 | 3.17738131 | 0.007890825 | 99.21091746 |
| 864 | 4.009026738 | 0.009956164 | 99.00438358 |
| 872 | 7.408240698 | 0.018397897 | 98.1602103 |
| 880 | 3.906140497 | 0.009700653 | 99.02993473 |
| 888 | 4.081251339 | 0.010135529 | 98.98644706 |
| 896 | 5.385740578 | 0.013375146 | 98.66248541 |
| 904 | 25.02307434 | 0.062143222 | 93.78567784 |
| 912 | 13.42652069 | 0.033343914 | 96.66560855 |
| 920 | 3.471193687 | 0.00862049 | 99.13795101 |
| 928 | 2.23559214 | 0.005551952 | 99.44480484 |
| 936 | 4.535536697 | 0.011263718 | 98.87362816 |
| 944 | 7.514614957 | 0.018662071 | 98.13379293 |
| 952 | 1.784776171 | 0.004432379 | 99.55676213 |
| 960 | 0.94827497 | 0.002354981 | 99.76450191 |
| 968 | 0.738322663 | 0.001833578 | 99.81664224 |
| 976 | 0.755463956 | 0.001876147 | 99.81238531 |
| 984 | 0.757062826 | 0.001880118 | 99.81198824 |
| 992 | 0.831816062 | 0.002065763 | 99.79342374 |
| 1000 | 1.066153757 | 0.002647725 | 99.73522746 |
| 1008 | 1.576965788 | 0.003916295 | 99.60837053 |
| 1016 | 2.911372768 | 0.00723021 | 99.276979 |
| 1024 | 8.310105751 | 0.020637622 | 97.93623782 |
| 1032 | 44.48387993 | 0.110472901 | 88.95270992 |
| 1040 | 11.68335916 | 0.029014883 | 97.09851169 |
| 1048 | 3.974661245 | 0.00987082 | 99.01291803 |
| 1056 | 2.675732888 | 0.006645013 | 99.33549867 |
| 1064 | 2.731684378 | 0.006783965 | 99.32160347 |
| 1072 | 3.834801971 | 0.009523488 | 99.0476512 |
| 1080 | 8.108062113 | 0.020135859 | 97.98641408 |
| 1088 | 33.97879373 | 0.084384184 | 91.5615816 |
| 1096 | 20.22557693 | 0.05022894 | 94.97710596 |
| 1104 | 53.46368917 | 0.132773689 | 86.72263112 |
| 1112 | 118.3378811 | 0.293884639 | 70.61153608 |
| 1120 | 21.16255542 | 0.052555867 | 94.74441328 |
| 1128 | 7.714764557 | 0.01915913 | 98.08408704 |
| 1136 | 4.41447719 | 0.010963075 | 98.90369253 |
| 1144 | 3.136353273 | 0.007788935 | 99.22110651 |
| 1152 | 2.050424484 | 0.005092099 | 99.49079005 |
| 1160 | 1.920709051 | 0.004769959 | 99.52300406 |
| 1168 | 3.913989588 | 0.009720145 | 99.02798545 |
| 1176 | 3.606599892 | 0.008956763 | 99.10432374 |
| 1184 | 1.462322426 | 0.003631585 | 99.63684148 |
| 1192 | 1.172844534 | 0.002912685 | 99.70873148 |
| 1200 | 1.222390949 | 0.003035731 | 99.69642694 |
| 1208 | 1.709633033 | 0.004245765 | 99.57542345 |
| 1216 | 3.919158808 | 0.009732983 | 99.02670171 |
| 1224 | 18.59906385 | 0.046189598 | 95.38104019 |
| 1232 | 5.926333959 | 0.014717675 | 98.52823246 |
| 1240 | 2.840608794 | 0.007054472 | 99.29455278 |
| 1248 | 2.947403787 | 0.007319691 | 99.26803092 |
| 1256 | 4.969575425 | 0.012341626 | 98.76583739 |
| 1264 | 16.52796243 | 0.041046149 | 95.89538512 |
| 1272 | 37.23718193 | 0.092476185 | 90.75238151 |
| 1280 | 10.17475028 | 0.025268348 | 97.47316516 |
| 1288 | 12.41709028 | 0.030837058 | 96.91629421 |
| 1296 | 53.61120273 | 0.133140029 | 86.68599706 |
| 1304 | 40.50287297 | 0.100586322 | 89.94136781 |
| 1312 | 9.543694672 | 0.023701162 | 97.62988382 |
| 1320 | 4.621366574 | 0.011476871 | 98.85231286 |
| 1328 | 3.400621418 | 0.008445228 | 99.15547719 |
| 1336 | 3.215235707 | 0.007984834 | 99.20151656 |
| 1344 | 3.784508336 | 0.009398587 | 99.0601413 |
| 1352 | 5.505178101 | 0.013671761 | 98.63282386 |
| 1360 | 10.47165817 | 0.0260057 | 97.39942996 |
| 1368 | 32.23514317 | 0.080053938 | 91.99460618 |
| 1376 | 143.3358065 | 0.355965405 | 64.40345951 |
| 1384 | 83.74685727 | 0.20798002 | 79.20199796 |
| 1392 | 25.89483933 | 0.064308195 | 93.56918052 |
| 1400 | 9.072730402 | 0.022531552 | 97.74684482 |
| 1408 | 5.245933364 | 0.013027944 | 98.69720565 |
| 1416 | 4.058221889 | 0.010078337 | 98.99216627 |
| 1424 | 4.024699763 | 0.009995087 | 99.00049128 |
| 1432 | 5.225615624 | 0.012977486 | 98.70225143 |
| 1440 | 10.09454866 | 0.025069173 | 97.49308272 |
| 1448 | 40.43969194 | 0.100429416 | 89.95705841 |
| 1456 | 53.13028016 | 0.131945689 | 86.80543114 |
| 1464 | 14.62002215 | 0.0363079 | 96.36921002 |
| 1472 | 15.31537272 | 0.038034759 | 96.1965241 |
| 1480 | 53.06598435 | 0.131786014 | 86.82139859 |
| 1488 | 83.92828986 | 0.208430597 | 79.15694032 |
| 1496 | 16.49269496 | 0.040958564 | 95.90414357 |
| 1504 | 6.992508245 | 0.017365452 | 98.26345483 |
| 1512 | 4.871685671 | 0.012098523 | 98.79014769 |
| 1520 | 6.947895997 | 0.01725466 | 98.274534 |
| 1528 | 14.1385078 | 0.035112089 | 96.48879106 |
| 1536 | 6.577272323 | 0.01633424 | 98.36657604 |
| 1544 | 16.20782557 | 0.040251109 | 95.97488909 |
| 1552 | 39.16665228 | 0.097267902 | 90.27320976 |
| 1560 | 7.303765655 | 0.01813844 | 98.18615602 |
| 1568 | 2.826457901 | 0.007019329 | 99.29806707 |
| 1576 | 1.598833002 | 0.003970601 | 99.60293994 |
| 1584 | 1.099334164 | 0.002730127 | 99.72698732 |
| 1592 | 0.866529459 | 0.002151971 | 99.78480289 |
| 1600 | 0.793684615 | 0.001971066 | 99.80289345 |
| 1608 | 0.969704196 | 0.002408199 | 99.7591801 |
| 1616 | 2.552692125 | 0.006339449 | 99.36605506 |
| 1624 | 3.02877596 | 0.007521773 | 99.24782266 |
| 1632 | 0.960012609 | 0.002384131 | 99.76158694 |
| 1640 | 0.800197807 | 0.001987241 | 99.80127594 |
| 1648 | 1.143722347 | 0.002840362 | 99.71596379 |
| 1656 | 3.803001045 | 0.009444512 | 99.05554876 |
| 1664 | 12.27887515 | 0.030493809 | 96.95061906 |
| 1672 | 2.184188388 | 0.005424294 | 99.45757064 |
| 1680 | 0.760995279 | 0.001889884 | 99.81101164 |
| 1688 | 0.387084205 | 0.000961299 | 99.90387009 |
| 1696 | 0.242124957 | 0.000601302 | 99.9398698 |
| 1704 | 0.169310912 | 0.000420473 | 99.95795271 |
| 1712 | 0.09792011 | 0.000243178 | 99.97568216 |
| 1720 | 0.073584242 | 0.000182742 | 99.98172582 |
| 1728 | 0.057397865 | 0.000142544 | 99.9857456 |
| 1736 | 0.046071736 | 0.000114416 | 99.98855838 |
| 1744 | 0.037827475 | 9.39421E-05 | 99.99060579 |
| 1752 | 0.031634068 | 7.85612E-05 | 99.99214388 |
| 1760 | 0.026859683 | 6.67043E-05 | 99.99332957 |
| 1768 | 0.023099209 | 5.73654E-05 | 99.99426346 |
| 1776 | 0.020082975 | 4.98748E-05 | 99.99501252 |
| 1784 | 0.01480448 | 3.6766E-05 | 99.9963234 |
| 1792 | 0.01303216 | 3.23645E-05 | 99.99676355 |
| 1800 | 0.011559968 | 2.87084E-05 | 99.99712916 |
| 1808 | 0.010323788 | 2.56385E-05 | 99.99743615 |
| 1816 | 0.009275752 | 2.30357E-05 | 99.99769643 |
| 1824 | 0 | 0 | 100 |
| 1832 | 0 | 0 | 100 |
| 1840 | 0 | 0 | 100 |
| 1848 | 0 | 0 | 100 |
| 1856 | 0 | 0 | 100 |
| 1864 | 0 | 0 | 100 |
| 1872 | 0 | 0 | 100 |
| 1880 | 0 | 0 | 100 |
| 1888 | 0 | 0 | 100 |
| 1896 | 0 | 0 | 100 |
| 1904 | 0 | 0 | 100 |
| 1912 | 0 | 0 | 100 |
| 1920 | 0 | 0 | 100 |
| 1928 | 0 | 0 | 100 |
| 1936 | 0 | 0 | 100 |
| 1944 | 0 | 0 | 100 |
| 1952 | 0 | 0 | 100 |
| 1960 | 0 | 0 | 100 |
| 1968 | 0 | 0 | 100 |
| 1976 | 0 | 0 | 100 |
| 1984 | 0 | 0 | 100 |
| 1992 | 0 | 0 | 100 |
| 2000 | 0 | 0 | 100 |
| 2008 | 0 | 0 | 100 |
| 2016 | 0 | 0 | 100 |
| 2024 | 0 | 0 | 100 |
| 2032 | 0 | 0 | 100 |
| 2040 | 0 | 0 | 100 |
| 2048 | 0 | 0 | 100 |
| 2056 | 0 | 0 | 100 |
| 2064 | 0 | 0 | 100 |
| 2072 | 0 | 0 | 100 |
| 2080 | 0 | 0 | 100 |
| 2088 | 0 | 0 | 100 |
| 2096 | 0 | 0 | 100 |
| 2104 | 0 | 0 | 100 |
| 2112 | 0 | 0 | 100 |
| 2120 | 0 | 0 | 100 |
| 2128 | 0 | 0 | 100 |
| 2136 | 0 | 0 | 100 |
| 2144 | 0 | 0 | 100 |
| 2152 | 0 | 0 | 100 |
| 2160 | 0 | 0 | 100 |
| 2168 | 0 | 0 | 100 |
| 2176 | 0 | 0 | 100 |
| 2184 | 0 | 0 | 100 |
| 2192 | 0 | 0 | 100 |
| 2200 | 0 | 0 | 100 |
| 2208 | 0 | 0 | 100 |
| 2216 | 0 | 0 | 100 |
| 2224 | 0 | 0 | 100 |
| 2232 | 0 | 0 | 100 |
| 2240 | 0 | 0 | 100 |
| 2248 | 0 | 0 | 100 |
| 2256 | 0 | 0 | 100 |
| 2264 | 0 | 0 | 100 |
| 2272 | 0 | 0 | 100 |
| 2280 | 0 | 0 | 100 |
| 2288 | 0 | 0 | 100 |
| 2296 | 0 | 0 | 100 |
| 2304 | 0 | 0 | 100 |
| 2312 | 0 | 0 | 100 |
| 2320 | 0 | 0 | 100 |
| 2328 | 0 | 0 | 100 |
| 2336 | 0 | 0 | 100 |
| 2344 | 0 | 0 | 100 |
| 2352 | 0 | 0 | 100 |
| 2360 | 0 | 0 | 100 |
| 2368 | 0 | 0 | 100 |
| 2376 | 0 | 0 | 100 |
| 2384 | 0 | 0 | 100 |
| 2392 | 0 | 0 | 100 |
| 2400 | 0 | 0 | 100 |
| 2408 | 0 | 0 | 100 |
| 2416 | 0 | 0 | 100 |
| 2424 | 0 | 0 | 100 |
| 2432 | 0 | 0 | 100 |
| 2440 | 0 | 0 | 100 |
| 2448 | 0 | 0 | 100 |
| 2456 | 0 | 0 | 100 |
| 2464 | 0 | 0 | 100 |
| 2472 | 0 | 0 | 100 |
| 2480 | 0 | 0 | 100 |
| 2488 | 0 | 0 | 100 |
| 2496 | 0 | 0 | 100 |
| 2504 | 0 | 0 | 100 |
| 2512 | 0 | 0 | 100 |
| 2520 | 0 | 0 | 100 |
| 2528 | 0 | 0 | 100 |
| 2536 | 0 | 0 | 100 |
| 2544 | 0 | 0 | 100 |
| 2552 | 0 | 0 | 100 |
| 2560 | 0 | 0 | 100 |
| 2568 | 0 | 0 | 100 |
| 2576 | 0 | 0 | 100 |
| 2584 | 0 | 0 | 100 |
| 2592 | 0 | 0 | 100 |
| 2600 | 0 | 0 | 100 |
| 2608 | 0 | 0 | 100 |
| 2616 | 0 | 0 | 100 |
| 2624 | 0 | 0 | 100 |
| 2632 | 0 | 0 | 100 |
| 2640 | 0 | 0 | 100 |
| 2648 | 0 | 0 | 100 |
| 2656 | 0 | 0 | 100 |
| 2664 | 0 | 0 | 100 |
| 2672 | 0 | 0 | 100 |
| 2680 | 0 | 0 | 100 |
| 2688 | 0 | 0 | 100 |
| 2696 | 0 | 0 | 100 |
| 2704 | 0 | 0 | 100 |
| 2712 | 0 | 0 | 100 |
| 2720 | 0 | 0 | 100 |
| 2728 | 0 | 0 | 100 |
| 2736 | 0 | 0 | 100 |
| 2744 | 0 | 0 | 100 |
| 2752 | 0 | 0 | 100 |
| 2760 | 0 | 0 | 100 |
| 2768 | 0 | 0 | 100 |
| 2776 | 0 | 0 | 100 |
| 2784 | 0 | 0 | 100 |
| 2792 | 0 | 0 | 100 |
| 2800 | 0 | 0 | 100 |
| 2808 | 0 | 0 | 100 |
| 2816 | 0 | 0 | 100 |
| 2824 | 0 | 0 | 100 |
| 2832 | 0 | 0 | 100 |
| 2840 | 0 | 0 | 100 |
| 2848 | 0 | 0 | 100 |
| 2856 | 0 | 0 | 100 |
| 2864 | 0 | 0 | 100 |
| 2872 | 0 | 0 | 100 |
| 2880 | 0 | 0 | 100 |
| 2888 | 0 | 0 | 100 |
| 2896 | 0 | 0 | 100 |
| 2904 | 0 | 0 | 100 |
| 2912 | 0 | 0 | 100 |
| 2920 | 0 | 0 | 100 |
| 2928 | 0 | 0 | 100 |
| 2936 | 0 | 0 | 100 |
| 2944 | 0 | 0 | 100 |
| 2952 | 0 | 0 | 100 |
| 2960 | 0 | 0 | 100 |
| 2968 | 0 | 0 | 100 |
| 2976 | 0 | 0 | 100 |
| 2984 | 0 | 0 | 100 |
| 2992 | 0 | 0 | 100 |
| 3000 | 0 | 0 | 100 |
| 3008 | 0 | 0 | 100 |
| 3016 | 0 | 0 | 100 |
| 3024 | 0.00296572 | 7.36518E-06 | 99.99926348 |
| 3032 | 0.013029999 | 3.23592E-05 | 99.99676408 |
| 3040 | 0.105884525 | 0.000262958 | 99.97370425 |
| 3048 | 0.16700487 | 0.000414746 | 99.9585254 |
| 3056 | 0.186705817 | 0.000463672 | 99.95363279 |
| 3064 | 0.210118647 | 0.000521816 | 99.94781836 |
| 3072 | 0.238240641 | 0.000591656 | 99.94083444 |
| 3080 | 0.272429119 | 0.00067656 | 99.93234395 |
| 3088 | 0.314570122 | 0.000781215 | 99.9218785 |
| 3096 | 0.372506944 | 0.000925097 | 99.90749026 |
| 3104 | 0.440416445 | 0.001093746 | 99.89062536 |
| 3112 | 0.528922474 | 0.001313545 | 99.86864545 |
| 3120 | 0.650999711 | 0.001616717 | 99.83832834 |
| 3128 | 0.81520919 | 0.00202452 | 99.79754796 |
| 3136 | 1.051782163 | 0.002612034 | 99.73879656 |
| 3144 | 1.411700496 | 0.003505869 | 99.64941312 |
| 3152 | 2.002430419 | 0.004972909 | 99.50270908 |
| 3160 | 3.09124728 | 0.007676917 | 99.2323083 |
| 3168 | 5.577819254 | 0.013852161 | 98.61478389 |
| 3176 | 14.56389739 | 0.036168518 | 96.38314824 |
| 3184 | 37.54051801 | 0.093229501 | 90.67704991 |
| 3192 | 123.9701733 | 0.30787208 | 69.21279196 |
| 3200 | 76.14687514 | 0.189105946 | 81.08940542 |
| 3208 | 49.46154475 | 0.122834616 | 87.71653836 |
| 3216 | 12.29254788 | 0.030527765 | 96.94722352 |
| 3224 | 5.605098465 | 0.013919907 | 98.60800927 |
| 3232 | 3.429301629 | 0.008516454 | 99.14835464 |
| 3240 | 2.79554258 | 0.006942553 | 99.30574469 |
| 3248 | 4.812305884 | 0.011951057 | 98.80489429 |
| 3256 | 6.113937138 | 0.015183576 | 98.4816424 |
| 3264 | 2.45220051 | 0.006089885 | 99.39101152 |
| 3272 | 5.297493147 | 0.013155989 | 98.6844011 |
| 3280 | 2.341147098 | 0.005814091 | 99.41859093 |
| 3288 | 0.94482046 | 0.002346402 | 99.76535982 |
| 3296 | 0.610081642 | 0.001515099 | 99.84849008 |
| 3304 | 0.459378325 | 0.001140837 | 99.8859163 |
| 3312 | 0.369709371 | 0.00091815 | 99.90818502 |
| 3320 | 0.30852034 | 0.000766191 | 99.92338093 |
| 3328 | 0.263452346 | 0.000654267 | 99.93457328 |
| 3336 | 0.228648003 | 0.000567833 | 99.94321672 |
| 3344 | 0.198377522 | 0.000492658 | 99.9507342 |
| 3352 | 0.167928122 | 0.000417039 | 99.95829611 |
| 3360 | 0.071879942 | 0.000178509 | 99.98214907 |
| 3368 | 0.019256172 | 4.78215E-05 | 99.99521785 |
| 3376 | 0.016597316 | 4.12184E-05 | 99.99587816 |
| 3384 | 0.014456898 | 3.59028E-05 | 99.99640972 |
| 3392 | 0.012707665 | 3.15587E-05 | 99.99684413 |
| 3400 | 0.011259321 | 2.79618E-05 | 99.99720382 |
| 3408 | 0.010046308 | 2.49494E-05 | 99.99750506 |
| 3416 | 0.004260062 | 1.05796E-05 | 99.99894204 |
| 3424 | 0.003818155 | 9.48215E-06 | 99.99905179 |
| 3432 | 0.003441591 | 8.54697E-06 | 99.9991453 |
| 3440 | 0 | 0 | 100 |
| 3448 | 0 | 0 | 100 |
| 3456 | 0 | 0 | 100 |
| 3464 | 0 | 0 | 100 |
| 3472 | 0 | 0 | 100 |
| 3480 | 0 | 0 | 100 |
| 3488 | 0 | 0 | 100 |
| 3496 | 0 | 0 | 100 |
| 3504 | 0 | 0 | 100 |
| 3512 | 0.262915058 | 0.000652933 | 99.93470671 |
| 3520 | 0.291811199 | 0.000724695 | 99.92753054 |
| 3528 | 0.325745341 | 0.000808968 | 99.91910321 |
| 3536 | 0.365960117 | 0.000908839 | 99.90911612 |
| 3544 | 0.41410617 | 0.001028406 | 99.89715935 |
| 3552 | 0.472414067 | 0.00117321 | 99.88267896 |
| 3560 | 0.543957022 | 0.001350883 | 99.86491172 |
| 3568 | 0.633063662 | 0.001572174 | 99.84278265 |
| 3576 | 0.745987303 | 0.001852612 | 99.81473877 |
| 3584 | 0.892031372 | 0.002215303 | 99.77846965 |
| 3592 | 1.085523846 | 0.00269583 | 99.73041702 |
| 3600 | 1.349459152 | 0.003351296 | 99.66487036 |
| 3608 | 1.722632059 | 0.004278048 | 99.57219523 |
| 3616 | 2.274679318 | 0.005649022 | 99.43509779 |
| 3624 | 3.140863402 | 0.007800136 | 99.21998645 |
| 3632 | 4.612734026 | 0.011455433 | 98.85445669 |
| 3640 | 7.415947365 | 0.018417036 | 98.1582964 |
| 3648 | 13.78475624 | 0.03423357 | 96.57664302 |
| 3656 | 33.45683603 | 0.083087935 | 91.69120649 |
| 3664 | 145.3360068 | 0.360932776 | 63.90672241 |
| 3672 | 284.2564513 | 0.705932909 | 29.40670913 |
| 3680 | 50.50177057 | 0.125417951 | 87.45820486 |
| 3688 | 17.94345889 | 0.044561445 | 95.54385553 |
| 3696 | 8.984246699 | 0.022311808 | 97.76881919 |
| 3704 | 5.361146883 | 0.013314069 | 98.6685931 |
| 3712 | 3.553728951 | 0.008825461 | 99.1174539 |
| 3720 | 2.525840208 | 0.006272764 | 99.37272357 |
| 3728 | 1.8865534 | 0.004685136 | 99.5314864 |
| 3736 | 1.462260988 | 0.003631433 | 99.63685674 |
| 3744 | 1.166420533 | 0.002896732 | 99.71032684 |
| 3752 | 0.951999243 | 0.00236423 | 99.76357701 |
| 3760 | 0.791662671 | 0.001966044 | 99.80339559 |
| 3768 | 0.66864875 | 0.001660547 | 99.83394531 |
| 3776 | 0.572216993 | 0.001421065 | 99.85789353 |
| 3784 | 0.495228465 | 0.001229869 | 99.87701314 |
| 3792 | 0.432788531 | 0.001074803 | 99.89251971 |
| 3800 | 0.381450736 | 0.000947309 | 99.90526912 |
| 3808 | 0.338731616 | 0.000841219 | 99.91587815 |
| 3816 | 0.302805039 | 0.000751997 | 99.92480028 |
| 3824 | 0.272304001 | 0.00067625 | 99.93237502 |
| 3832 | 0 | 0 | 100 |
| 3840 | 0 | 0 | 100 |
| 3848 | 0 | 0 | 100 |
| 3856 | 0 | 0 | 100 |
| 3864 | 0 | 0 | 100 |
| 3872 | 0 | 0 | 100 |
| 3880 | 0 | 0 | 100 |
| 3888 | 0 | 0 | 100 |
| 3896 | 0 | 0 | 100 |
| 3904 | 0 | 0 | 100 |
| 3912 | 0 | 0 | 100 |
| 3920 | 0 | 0 | 100 |
| 3928 | 0 | 0 | 100 |
| 3936 | 0 | 0 | 100 |
| 3944 | 0 | 0 | 100 |
| 3952 | 0 | 0 | 100 |
| 3960 | 0 | 0 | 100 |
| 3968 | 0 | 0 | 100 |
| 3976 | 0 | 0 | 100 |
| 3984 | 0 | 0 | 100 |
| 3992 | 0 | 0 | 100 |

| Ccl4 |  |  |  |
| --- | --- | --- | --- |
| Frequency | Epsilon | Absorbance | Transmittance (%) |
| 0 | 0 | 0 | 100 |
| 8 | 0 | 0 | 100 |
| 16 | 0 | 0 | 100 |
| 24 | 0 | 0 | 100 |
| 32 | 0 | 0 | 100 |
| 40 | 0 | 0 | 100 |
| 48 | 0 | 0 | 100 |
| 56 | 0.036004343 | 8.98877E-05 | 99.99101123 |
| 64 | 0.039911937 | 9.96433E-05 | 99.99003567 |
| 72 | 0.044491808 | 0.000111077 | 99.98889227 |
| 80 | 0.049907453 | 0.000124598 | 99.98754021 |
| 88 | 0.056952577 | 0.000142187 | 99.98578134 |
| 96 | 0.06482682 | 0.000161845 | 99.98381547 |
| 104 | 0.074454658 | 0.000185882 | 99.9814118 |
| 112 | 0.086398204 | 0.0002157 | 99.97843 |
| 120 | 0.10146421 | 0.000253313 | 99.97466865 |
| 128 | 0.120843854 | 0.000301696 | 99.96983037 |
| 136 | 0.146355371 | 0.000365388 | 99.96346122 |
| 144 | 0.180885936 | 0.000451596 | 99.95484038 |
| 152 | 0.229244147 | 0.000572326 | 99.94276737 |
| 160 | 0.299924067 | 0.000748784 | 99.92512157 |
| 168 | 0.409089128 | 0.001021324 | 99.89786764 |
| 176 | 0.590639171 | 0.001474578 | 99.85254222 |
| 184 | 0.925774327 | 0.002311269 | 99.76887306 |
| 192 | 1.650386991 | 0.004120323 | 99.58796774 |
| 200 | 3.695970101 | 0.009227284 | 99.07727161 |
| 208 | 13.42399792 | 0.033514081 | 96.64859195 |
| 216 | 54.98901577 | 0.13728446 | 86.27155403 |
| 224 | 9.833686386 | 0.024550582 | 97.54494183 |
| 232 | 3.134685869 | 0.007825993 | 99.21740069 |
| 240 | 1.926870626 | 0.004810586 | 99.51894139 |
| 248 | 1.836562706 | 0.004585125 | 99.54148749 |
| 256 | 0.952288213 | 0.002377463 | 99.76225366 |
| 264 | 0.738762421 | 0.001844379 | 99.81556207 |
| 272 | 0.658330057 | 0.001643573 | 99.83564266 |
| 280 | 0.643670934 | 0.001606976 | 99.83930242 |
| 288 | 0.656464848 | 0.001638917 | 99.83610832 |
| 296 | 0.698781771 | 0.001744564 | 99.82554356 |
| 304 | 0.770641306 | 0.001923967 | 99.80760326 |
| 312 | 0.876848557 | 0.002189122 | 99.78108777 |
| 320 | 1.02755902 | 0.002565383 | 99.7434617 |
| 328 | 1.240766721 | 0.003097673 | 99.6902327 |
| 336 | 1.547869391 | 0.003864379 | 99.61356207 |
| 344 | 2.005720709 | 0.005007442 | 99.49925584 |
| 352 | 2.724499555 | 0.00680193 | 99.31980698 |
| 360 | 3.939688665 | 0.009835747 | 99.01642533 |
| 368 | 6.229439532 | 0.015552292 | 98.44477078 |
| 376 | 11.3021663 | 0.028216759 | 97.17832412 |
| 384 | 26.58123562 | 0.066362173 | 93.36378271 |
| 392 | 108.5281564 | 0.270949191 | 72.90508095 |
| 400 | 271.3614378 | 0.677475453 | 32.25245468 |
| 408 | 53.35579923 | 0.133207004 | 86.67929955 |
| 416 | 18.02490768 | 0.045000618 | 95.49993816 |
| 424 | 10.90400893 | 0.027222727 | 97.27772728 |
| 432 | 18.47283358 | 0.046118901 | 95.38810989 |
| 440 | 6.154318999 | 0.015364748 | 98.46352522 |
| 448 | 3.111471678 | 0.007768037 | 99.2231963 |
| 456 | 2.093755414 | 0.005227227 | 99.47727728 |
| 464 | 1.5473561 | 0.003863098 | 99.61369022 |
| 472 | 1.207254398 | 0.003014007 | 99.69859932 |
| 480 | 0.977104429 | 0.002439419 | 99.75605809 |
| 488 | 0.813545329 | 0.002031081 | 99.79689193 |
| 496 | 0.693801972 | 0.001732132 | 99.82678681 |
| 504 | 0.604843401 | 0.00151004 | 99.84899603 |
| 512 | 0.538977352 | 0.0013456 | 99.86544001 |
| 520 | 0.491993118 | 0.0012283 | 99.87717 |
| 528 | 0.462984492 | 0.001155878 | 99.88441223 |
| 536 | 0.458189448 | 0.001143906 | 99.88560935 |
| 544 | 0.530360531 | 0.001324087 | 99.86759127 |
| 552 | 0.756216869 | 0.001887956 | 99.81120443 |
| 560 | 0.352672832 | 0.000880476 | 99.91195242 |
| 568 | 0.450234737 | 0.001124047 | 99.88759531 |
| 576 | 0.941106867 | 0.002349548 | 99.76504517 |
| 584 | 3.317787505 | 0.008283121 | 99.17168791 |
| 592 | 2.353479449 | 0.005875649 | 99.4124351 |
| 600 | 3.286084044 | 0.008203971 | 99.17960293 |
| 608 | 10.86146441 | 0.027116511 | 97.28834886 |
| 616 | 30.53940139 | 0.076244049 | 92.37559509 |
| 624 | 5.998978053 | 0.014976927 | 98.50230733 |
| 632 | 2.556609023 | 0.006382778 | 99.36172218 |
| 640 | 1.771753119 | 0.004423323 | 99.55766772 |
| 648 | 1.56967905 | 0.003918829 | 99.60811712 |
| 656 | 1.591836539 | 0.003974147 | 99.60258532 |
| 664 | 1.752349725 | 0.004374881 | 99.56251193 |
| 672 | 2.043398416 | 0.005101507 | 99.4898493 |
| 680 | 2.501649147 | 0.006245566 | 99.37544336 |
| 688 | 3.220278982 | 0.008039683 | 99.19603169 |
| 696 | 4.411684623 | 0.011014122 | 98.89858778 |
| 704 | 6.628529941 | 0.016548653 | 98.34513468 |
| 712 | 11.76787633 | 0.029379441 | 97.0620559 |
| 720 | 30.82419375 | 0.076955056 | 92.3044944 |
| 728 | 135.3858081 | 0.338001458 | 66.19985417 |
| 736 | 49.24113771 | 0.122934424 | 87.70655759 |
| 744 | 76.58082233 | 0.191190125 | 80.88098747 |
| 752 | 400.5479936 | 0.999999984 | 1.60787E-06 |
| 760 | 136.7736224 | 0.341466247 | 65.85337529 |
| 768 | 49.59910766 | 0.123828125 | 87.61718754 |
| 776 | 78.43732016 | 0.19582502 | 80.41749799 |
| 784 | 41.50824539 | 0.103628642 | 89.63713578 |
| 792 | 13.13373441 | 0.032789415 | 96.72105855 |
| 800 | 7.036559083 | 0.01756733 | 98.24326695 |
| 808 | 4.609872944 | 0.011508915 | 98.84910849 |
| 816 | 3.348498674 | 0.008359794 | 99.16402062 |
| 824 | 2.605691861 | 0.006505317 | 99.34946826 |
| 832 | 2.150868361 | 0.005369814 | 99.46301857 |
| 840 | 1.904599555 | 0.004754985 | 99.52450154 |
| 848 | 1.934677912 | 0.004830078 | 99.51699224 |
| 856 | 3.153262415 | 0.007872371 | 99.21276291 |
| 864 | 4.114288088 | 0.010271648 | 98.97283519 |
| 872 | 7.268636887 | 0.018146731 | 98.18532688 |
| 880 | 3.815437749 | 0.009525544 | 99.04744556 |
| 888 | 3.954418238 | 0.00987252 | 99.01274798 |
| 896 | 5.224352882 | 0.013043013 | 98.69569867 |
| 904 | 24.16041847 | 0.06031841 | 93.968159 |
| 912 | 13.24259732 | 0.033061199 | 96.69388005 |
| 920 | 3.412587621 | 0.008519797 | 99.14802031 |
| 928 | 2.211529369 | 0.005521259 | 99.44787407 |
| 936 | 4.606796882 | 0.011501236 | 98.84987645 |
| 944 | 7.088799535 | 0.017697753 | 98.23022471 |
| 952 | 1.712357964 | 0.004275038 | 99.57249619 |
| 960 | 0.918465042 | 0.002293021 | 99.77069788 |
| 968 | 0.716917706 | 0.001789842 | 99.82101578 |
| 976 | 0.735217728 | 0.00183553 | 99.81644704 |
| 984 | 0.734445273 | 0.001833601 | 99.81663989 |
| 992 | 0.805050295 | 0.002009872 | 99.79901278 |
| 1000 | 1.029579319 | 0.002570427 | 99.74295732 |
| 1008 | 1.518803149 | 0.003791813 | 99.62081869 |
| 1016 | 2.793330296 | 0.006973772 | 99.30262283 |
| 1024 | 7.917603185 | 0.019766927 | 98.02330727 |
| 1032 | 42.59276808 | 0.10633624 | 89.36637605 |
| 1040 | 11.44936635 | 0.028584255 | 97.14157446 |
| 1048 | 3.867974712 | 0.009656707 | 99.03432929 |
| 1056 | 2.596699904 | 0.006482868 | 99.35171318 |
| 1064 | 2.646607361 | 0.006607466 | 99.33925338 |
| 1072 | 3.706626242 | 0.009253888 | 99.07461122 |
| 1080 | 7.785187757 | 0.019436342 | 98.05636584 |
| 1088 | 32.7769701 | 0.081830318 | 91.81696823 |
| 1096 | 19.70057009 | 0.049184043 | 95.08159569 |
| 1104 | 49.67902217 | 0.124027638 | 87.59723624 |
| 1112 | 120.3459313 | 0.300453207 | 69.95467927 |
| 1120 | 21.33263171 | 0.053258615 | 94.6741385 |
| 1128 | 7.673224728 | 0.019156817 | 98.0843183 |
| 1136 | 4.368386406 | 0.010906025 | 98.90939752 |
| 1144 | 3.155279902 | 0.007877408 | 99.21225923 |
| 1152 | 2.024055733 | 0.005053216 | 99.49467836 |
| 1160 | 1.879035401 | 0.004691162 | 99.53088384 |
| 1168 | 3.739916894 | 0.009337001 | 99.06629995 |
| 1176 | 3.710169958 | 0.009262735 | 99.07372651 |
| 1184 | 1.458196846 | 0.003640505 | 99.63594954 |
| 1192 | 1.157953647 | 0.002890924 | 99.71090764 |
| 1200 | 1.204456779 | 0.003007022 | 99.69929777 |
| 1208 | 1.684342581 | 0.004205095 | 99.57949045 |
| 1216 | 3.858235989 | 0.009632394 | 99.03676064 |
| 1224 | 18.38177889 | 0.045891576 | 95.41084242 |
| 1232 | 5.915048565 | 0.01476739 | 98.52326099 |
| 1240 | 2.799092833 | 0.006988158 | 99.30118417 |
| 1248 | 2.880714006 | 0.007191932 | 99.28080679 |
| 1256 | 4.829960574 | 0.012058381 | 98.79416185 |
| 1264 | 15.94879854 | 0.039817446 | 96.01825536 |
| 1272 | 36.81837802 | 0.091920015 | 90.80799854 |
| 1280 | 9.976434849 | 0.024906965 | 97.50930354 |
| 1288 | 12.05052717 | 0.030085101 | 96.99148987 |
| 1296 | 51.71609595 | 0.129113355 | 87.08866454 |
| 1304 | 39.7663239 | 0.099279796 | 90.07202036 |
| 1312 | 9.331985685 | 0.023298046 | 97.67019541 |
| 1320 | 4.508752862 | 0.011256461 | 98.87435392 |
| 1328 | 3.31294865 | 0.00827104 | 99.17289597 |
| 1336 | 3.129680303 | 0.007813496 | 99.21865037 |
| 1344 | 3.683110262 | 0.009195178 | 99.08048217 |
| 1352 | 5.361603253 | 0.01338567 | 98.66143302 |
| 1360 | 10.22352899 | 0.025523855 | 97.44761452 |
| 1368 | 31.6846369 | 0.079103221 | 92.08967792 |
| 1376 | 138.5297227 | 0.345850492 | 65.41495083 |
| 1384 | 79.94850908 | 0.199597824 | 80.04021763 |
| 1392 | 25.30700926 | 0.063180965 | 93.68190348 |
| 1400 | 8.813729739 | 0.022004179 | 97.79958214 |
| 1408 | 5.089355856 | 0.012705982 | 98.72940176 |
| 1416 | 3.936297084 | 0.009827279 | 99.01727207 |
| 1424 | 3.902717635 | 0.009743446 | 99.02565544 |
| 1432 | 5.06026649 | 0.012633359 | 98.73666415 |
| 1440 | 9.733985522 | 0.024301671 | 97.56983295 |
| 1448 | 38.59410875 | 0.096353268 | 90.36467321 |
| 1456 | 53.02731445 | 0.132386916 | 86.76130839 |
| 1464 | 14.37326281 | 0.035883996 | 96.4116004 |
| 1472 | 14.8702717 | 0.037124818 | 96.28751818 |
| 1480 | 51.12713647 | 0.12764297 | 87.23570297 |
| 1488 | 82.24055808 | 0.205320107 | 79.46798934 |
| 1496 | 16.11080829 | 0.040221917 | 95.97780833 |
| 1504 | 6.811629845 | 0.017005777 | 98.29942233 |
| 1512 | 4.728236036 | 0.011804418 | 98.8195582 |
| 1520 | 6.65987812 | 0.016626916 | 98.33730836 |
| 1528 | 14.10501512 | 0.035214294 | 96.47857058 |
| 1536 | 6.34379151 | 0.015837781 | 98.4162219 |
| 1544 | 14.95918009 | 0.037346785 | 96.26532149 |
| 1552 | 39.89090084 | 0.099590813 | 90.04091873 |
| 1560 | 7.385278551 | 0.018437936 | 98.15620636 |
| 1568 | 2.808090944 | 0.007010623 | 99.29893772 |
| 1576 | 1.576180767 | 0.003935061 | 99.60649391 |
| 1584 | 1.079362394 | 0.002694714 | 99.73052858 |
| 1592 | 0.84860892 | 0.00211862 | 99.78813802 |
| 1600 | 0.77544452 | 0.001935959 | 99.8064041 |
| 1608 | 0.943221315 | 0.002354827 | 99.76451728 |
| 1616 | 2.453710395 | 0.006125884 | 99.38741165 |
| 1624 | 3.013304655 | 0.007522955 | 99.24770448 |
| 1632 | 0.945434319 | 0.002360352 | 99.76396479 |
| 1640 | 0.785045967 | 0.00195993 | 99.80400702 |
| 1648 | 1.120852337 | 0.002798297 | 99.72017028 |
| 1656 | 3.710259769 | 0.009262959 | 99.07370408 |
| 1664 | 12.19572008 | 0.030447587 | 96.9552413 |
| 1672 | 2.171041477 | 0.005420178 | 99.4579822 |
| 1680 | 0.75329192 | 0.001880653 | 99.81193467 |
| 1688 | 0.382331748 | 0.000954522 | 99.90454783 |
| 1696 | 0.238788459 | 0.000596154 | 99.94038456 |
| 1704 | 0.166786045 | 0.000416395 | 99.95836053 |
| 1712 | 0.096659333 | 0.000241318 | 99.97586823 |
| 1720 | 0.072610768 | 0.000181279 | 99.98187214 |
| 1728 | 0.056622452 | 0.000141362 | 99.98586375 |
| 1736 | 0.045438816 | 0.000113442 | 99.98865584 |
| 1744 | 0.037300613 | 9.3124E-05 | 99.9906876 |
| 1752 | 0.03118836 | 7.78642E-05 | 99.99221358 |
| 1760 | 0.02647751 | 6.61032E-05 | 99.99338968 |
| 1768 | 0.022767744 | 5.68415E-05 | 99.99431585 |
| 1776 | 0.019792653 | 4.94139E-05 | 99.99505861 |
| 1784 | 0.014608864 | 3.64722E-05 | 99.99635278 |
| 1792 | 0.01285933 | 3.21043E-05 | 99.99678957 |
| 1800 | 0.011406165 | 2.84764E-05 | 99.99715236 |
| 1808 | 0.010186037 | 2.54303E-05 | 99.99745697 |
| 1816 | 0.009151667 | 2.28479E-05 | 99.99771521 |
| 1824 | 0 | 0 | 100 |
| 1832 | 0 | 0 | 100 |
| 1840 | 0 | 0 | 100 |
| 1848 | 0 | 0 | 100 |
| 1856 | 0 | 0 | 100 |
| 1864 | 0 | 0 | 100 |
| 1872 | 0 | 0 | 100 |
| 1880 | 0 | 0 | 100 |
| 1888 | 0 | 0 | 100 |
| 1896 | 0 | 0 | 100 |
| 1904 | 0 | 0 | 100 |
| 1912 | 0 | 0 | 100 |
| 1920 | 0 | 0 | 100 |
| 1928 | 0 | 0 | 100 |
| 1936 | 0 | 0 | 100 |
| 1944 | 0 | 0 | 100 |
| 1952 | 0 | 0 | 100 |
| 1960 | 0 | 0 | 100 |
| 1968 | 0 | 0 | 100 |
| 1976 | 0 | 0 | 100 |
| 1984 | 0 | 0 | 100 |
| 1992 | 0 | 0 | 100 |
| 2000 | 0 | 0 | 100 |
| 2008 | 0 | 0 | 100 |
| 2016 | 0 | 0 | 100 |
| 2024 | 0 | 0 | 100 |
| 2032 | 0 | 0 | 100 |
| 2040 | 0 | 0 | 100 |
| 2048 | 0 | 0 | 100 |
| 2056 | 0 | 0 | 100 |
| 2064 | 0 | 0 | 100 |
| 2072 | 0 | 0 | 100 |
| 2080 | 0 | 0 | 100 |
| 2088 | 0 | 0 | 100 |
| 2096 | 0 | 0 | 100 |
| 2104 | 0 | 0 | 100 |
| 2112 | 0 | 0 | 100 |
| 2120 | 0 | 0 | 100 |
| 2128 | 0 | 0 | 100 |
| 2136 | 0 | 0 | 100 |
| 2144 | 0 | 0 | 100 |
| 2152 | 0 | 0 | 100 |
| 2160 | 0 | 0 | 100 |
| 2168 | 0 | 0 | 100 |
| 2176 | 0 | 0 | 100 |
| 2184 | 0 | 0 | 100 |
| 2192 | 0 | 0 | 100 |
| 2200 | 0 | 0 | 100 |
| 2208 | 0 | 0 | 100 |
| 2216 | 0 | 0 | 100 |
| 2224 | 0 | 0 | 100 |
| 2232 | 0 | 0 | 100 |
| 2240 | 0 | 0 | 100 |
| 2248 | 0 | 0 | 100 |
| 2256 | 0 | 0 | 100 |
| 2264 | 0 | 0 | 100 |
| 2272 | 0 | 0 | 100 |
| 2280 | 0 | 0 | 100 |
| 2288 | 0 | 0 | 100 |
| 2296 | 0 | 0 | 100 |
| 2304 | 0 | 0 | 100 |
| 2312 | 0 | 0 | 100 |
| 2320 | 0 | 0 | 100 |
| 2328 | 0 | 0 | 100 |
| 2336 | 0 | 0 | 100 |
| 2344 | 0 | 0 | 100 |
| 2352 | 0 | 0 | 100 |
| 2360 | 0 | 0 | 100 |
| 2368 | 0 | 0 | 100 |
| 2376 | 0 | 0 | 100 |
| 2384 | 0 | 0 | 100 |
| 2392 | 0 | 0 | 100 |
| 2400 | 0 | 0 | 100 |
| 2408 | 0 | 0 | 100 |
| 2416 | 0 | 0 | 100 |
| 2424 | 0 | 0 | 100 |
| 2432 | 0 | 0 | 100 |
| 2440 | 0 | 0 | 100 |
| 2448 | 0 | 0 | 100 |
| 2456 | 0 | 0 | 100 |
| 2464 | 0 | 0 | 100 |
| 2472 | 0 | 0 | 100 |
| 2480 | 0 | 0 | 100 |
| 2488 | 0 | 0 | 100 |
| 2496 | 0 | 0 | 100 |
| 2504 | 0 | 0 | 100 |
| 2512 | 0 | 0 | 100 |
| 2520 | 0 | 0 | 100 |
| 2528 | 0 | 0 | 100 |
| 2536 | 0 | 0 | 100 |
| 2544 | 0 | 0 | 100 |
| 2552 | 0 | 0 | 100 |
| 2560 | 0 | 0 | 100 |
| 2568 | 0 | 0 | 100 |
| 2576 | 0 | 0 | 100 |
| 2584 | 0 | 0 | 100 |
| 2592 | 0 | 0 | 100 |
| 2600 | 0 | 0 | 100 |
| 2608 | 0 | 0 | 100 |
| 2616 | 0 | 0 | 100 |
| 2624 | 0 | 0 | 100 |
| 2632 | 0 | 0 | 100 |
| 2640 | 0 | 0 | 100 |
| 2648 | 0 | 0 | 100 |
| 2656 | 0 | 0 | 100 |
| 2664 | 0 | 0 | 100 |
| 2672 | 0 | 0 | 100 |
| 2680 | 0 | 0 | 100 |
| 2688 | 0 | 0 | 100 |
| 2696 | 0 | 0 | 100 |
| 2704 | 0 | 0 | 100 |
| 2712 | 0 | 0 | 100 |
| 2720 | 0 | 0 | 100 |
| 2728 | 0 | 0 | 100 |
| 2736 | 0 | 0 | 100 |
| 2744 | 0 | 0 | 100 |
| 2752 | 0 | 0 | 100 |
| 2760 | 0 | 0 | 100 |
| 2768 | 0 | 0 | 100 |
| 2776 | 0 | 0 | 100 |
| 2784 | 0 | 0 | 100 |
| 2792 | 0 | 0 | 100 |
| 2800 | 0 | 0 | 100 |
| 2808 | 0 | 0 | 100 |
| 2816 | 0 | 0 | 100 |
| 2824 | 0 | 0 | 100 |
| 2832 | 0 | 0 | 100 |
| 2840 | 0 | 0 | 100 |
| 2848 | 0 | 0 | 100 |
| 2856 | 0 | 0 | 100 |
| 2864 | 0 | 0 | 100 |
| 2872 | 0 | 0 | 100 |
| 2880 | 0 | 0 | 100 |
| 2888 | 0 | 0 | 100 |
| 2896 | 0 | 0 | 100 |
| 2904 | 0 | 0 | 100 |
| 2912 | 0 | 0 | 100 |
| 2920 | 0 | 0 | 100 |
| 2928 | 0 | 0 | 100 |
| 2936 | 0 | 0 | 100 |
| 2944 | 0 | 0 | 100 |
| 2952 | 0 | 0 | 100 |
| 2960 | 0 | 0 | 100 |
| 2968 | 0 | 0 | 100 |
| 2976 | 0 | 0 | 100 |
| 2984 | 0 | 0 | 100 |
| 2992 | 0 | 0 | 100 |
| 3000 | 0 | 0 | 100 |
| 3008 | 0 | 0 | 100 |
| 3016 | 0 | 0 | 100 |
| 3024 | 0.003041316 | 7.59289E-06 | 99.99924071 |
| 3032 | 0.012931148 | 3.22836E-05 | 99.99677164 |
| 3040 | 0.105151636 | 0.000262519 | 99.97374806 |
| 3048 | 0.166019486 | 0.000414481 | 99.95855191 |
| 3056 | 0.185628659 | 0.000463437 | 99.95365633 |
| 3064 | 0.20893752 | 0.000521629 | 99.94783708 |
| 3072 | 0.236941596 | 0.000591544 | 99.94084564 |
| 3080 | 0.27099644 | 0.000676564 | 99.93234358 |
| 3088 | 0.312986634 | 0.000781396 | 99.92186039 |
| 3096 | 0.370648411 | 0.000925353 | 99.90746467 |
| 3104 | 0.43836251 | 0.001094407 | 99.89055931 |
| 3112 | 0.526664558 | 0.00131486 | 99.868514 |
| 3120 | 0.64870828 | 0.001619552 | 99.83804481 |
| 3128 | 0.812822466 | 0.002029276 | 99.79707239 |
| 3136 | 1.049536711 | 0.002620252 | 99.7379748 |
| 3144 | 1.410266605 | 0.003520843 | 99.6479157 |
| 3152 | 2.003825408 | 0.00500271 | 99.49972902 |
| 3160 | 3.102710998 | 0.007746165 | 99.22538348 |
| 3168 | 5.63776772 | 0.014075136 | 98.59248636 |
| 3176 | 14.91341316 | 0.037232524 | 96.27674757 |
| 3184 | 37.75066502 | 0.094247543 | 90.57524566 |
| 3192 | 126.4885236 | 0.315788679 | 68.42113214 |
| 3200 | 74.94321793 | 0.187101715 | 81.28982845 |
| 3208 | 47.90414203 | 0.119596508 | 88.04034921 |
| 3216 | 12.01757574 | 0.030002835 | 96.99971645 |
| 3224 | 5.505868841 | 0.01374584 | 98.62541597 |
| 3232 | 3.377153745 | 0.008431333 | 99.15686666 |
| 3240 | 2.757082821 | 0.006883277 | 99.3116723 |
| 3248 | 4.746464594 | 0.011849927 | 98.81500729 |
| 3256 | 5.9901659 | 0.014954926 | 98.50450735 |
| 3264 | 2.463346103 | 0.00614994 | 99.38500602 |
| 3272 | 5.538064734 | 0.01382622 | 98.61737801 |
| 3280 | 2.36686788 | 0.005909074 | 99.40909257 |
| 3288 | 0.949870197 | 0.002371427 | 99.76285734 |
| 3296 | 0.610378899 | 0.00152386 | 99.84761404 |
| 3304 | 0.458290999 | 0.00114416 | 99.885584 |
| 3312 | 0.368209372 | 0.000919264 | 99.9080736 |
| 3320 | 0.306942707 | 0.000766307 | 99.92336931 |
| 3328 | 0.261922186 | 0.00065391 | 99.93460904 |
| 3336 | 0.227211096 | 0.000567251 | 99.94327494 |
| 3344 | 0.196994892 | 0.000491813 | 99.95081866 |
| 3352 | 0.166857882 | 0.000416574 | 99.9583426 |
| 3360 | 0.071784962 | 0.000179217 | 99.98207831 |
| 3368 | 0.019440291 | 4.85342E-05 | 99.99514658 |
| 3376 | 0.016750063 | 4.18179E-05 | 99.99581821 |
| 3384 | 0.014585424 | 3.64137E-05 | 99.99635863 |
| 3392 | 0.012817143 | 3.1999E-05 | 99.9968001 |
| 3400 | 0.011353575 | 2.83451E-05 | 99.99716549 |
| 3408 | 0.010128222 | 2.52859E-05 | 99.99747141 |
| 3416 | 0.004432542 | 1.10662E-05 | 99.99889338 |
| 3424 | 0.003972995 | 9.9189E-06 | 99.99900811 |
| 3432 | 0.003581365 | 8.94116E-06 | 99.99910588 |
| 3440 | 0 | 0 | 100 |
| 3448 | 0 | 0 | 100 |
| 3456 | 0 | 0 | 100 |
| 3464 | 0 | 0 | 100 |
| 3472 | 0 | 0 | 100 |
| 3480 | 0 | 0 | 100 |
| 3488 | 0 | 0 | 100 |
| 3496 | 0 | 0 | 100 |
| 3504 | 0 | 0 | 100 |
| 3512 | 0.250942392 | 0.000626498 | 99.93735023 |
| 3520 | 0.278319191 | 0.000694846 | 99.9305154 |
| 3528 | 0.310431894 | 0.000775018 | 99.9224982 |
| 3536 | 0.348438972 | 0.000869906 | 99.91300943 |
| 3544 | 0.393875927 | 0.000983343 | 99.90166574 |
| 3552 | 0.44881267 | 0.001120497 | 99.88795034 |
| 3560 | 0.516093177 | 0.001288468 | 99.87115323 |
| 3568 | 0.59971054 | 0.001497225 | 99.85027748 |
| 3576 | 0.705412332 | 0.001761118 | 99.82388819 |
| 3584 | 0.841713234 | 0.002101404 | 99.78985958 |
| 3592 | 1.021660689 | 0.002550657 | 99.74493427 |
| 3600 | 1.266067974 | 0.00316084 | 99.68391604 |
| 3608 | 1.609791516 | 0.004018973 | 99.59810272 |
| 3616 | 2.114822651 | 0.005279823 | 99.47201767 |
| 3624 | 2.900145274 | 0.007240444 | 99.27595562 |
| 3632 | 4.218150489 | 0.010530949 | 98.94690512 |
| 3640 | 6.682967393 | 0.016684561 | 98.33154394 |
| 3648 | 12.12113586 | 0.030261382 | 96.97386185 |
| 3656 | 28.03484267 | 0.069991219 | 93.00087813 |
| 3664 | 109.3820565 | 0.27308102 | 72.69189798 |
| 3672 | 342.7445594 | 0.855689105 | 14.43108955 |
| 3680 | 58.83747395 | 0.146892442 | 85.31075578 |
| 3688 | 19.46384651 | 0.048593044 | 95.14069562 |
| 3696 | 9.428480397 | 0.023538953 | 97.64610474 |
| 3704 | 5.523368344 | 0.013789529 | 98.62104708 |
| 3712 | 3.618740442 | 0.009034474 | 99.09655261 |
| 3720 | 2.551459525 | 0.006369922 | 99.3630078 |
| 3728 | 1.894553636 | 0.004729904 | 99.52700959 |
| 3736 | 1.461928282 | 0.00364982 | 99.63501795 |
| 3744 | 1.162074076 | 0.002901211 | 99.70987895 |
| 3752 | 0.945773521 | 0.002361199 | 99.7638801 |
| 3760 | 0.784656007 | 0.001958956 | 99.80410438 |
| 3768 | 0.661439074 | 0.001651335 | 99.83486646 |
| 3776 | 0.565109275 | 0.00141084 | 99.85891597 |
| 3784 | 0.488379866 | 0.001219279 | 99.87807207 |
| 3792 | 0.426274422 | 0.001064228 | 99.89357719 |
| 3800 | 0.375300734 | 0.000936968 | 99.90630318 |
| 3808 | 0.332949776 | 0.000831236 | 99.91687644 |
| 3816 | 0.297381395 | 0.000742436 | 99.92575637 |
| 3824 | 0.267221254 | 0.000667139 | 99.93328608 |
| 3832 | 0 | 0 | 100 |
| 3840 | 0 | 0 | 100 |
| 3848 | 0 | 0 | 100 |
| 3856 | 0 | 0 | 100 |
| 3864 | 0 | 0 | 100 |
| 3872 | 0 | 0 | 100 |
| 3880 | 0 | 0 | 100 |
| 3888 | 0 | 0 | 100 |
| 3896 | 0 | 0 | 100 |
| 3904 | 0 | 0 | 100 |
| 3912 | 0 | 0 | 100 |
| 3920 | 0 | 0 | 100 |
| 3928 | 0 | 0 | 100 |
| 3936 | 0 | 0 | 100 |
| 3944 | 0 | 0 | 100 |
| 3952 | 0 | 0 | 100 |
| 3960 | 0 | 0 | 100 |
| 3968 | 0 | 0 | 100 |
| 3976 | 0 | 0 | 100 |
| 3984 | 0 | 0 | 100 |
| 3992 | 0 | 0 | 100 |

**Table S12.** Calculated SCF GIAO chemical shifts and shielding tensor of 1H NMR and 13C NMR in ppm.

| **Atom** | **Gas phase** | | **Water** | | **Acetonitrile** | | **Toluene** | | **Ccl4** | |
| --- | --- | --- | --- | --- | --- | --- | --- | --- | --- | --- |
| **Shielding** | **Chemical**  **shift** | **Shielding** | **Chemical shift** | **Shielding** | **Chemical shift** | **Shielding** | **Chemical shift** | **Shielding** | **Chemical**  **shift** |
| H10 | 24.1 | 7.77 | 22.63 | 9.25 | 22.76 | 9.12 | 23.51 | 8.37 | 23.5 | 8.34 |
| H11 | 24.4 | 7.44 | 23.76 | 8.13 | 23.85 | 8.04 | 24.20 | 7.70 | 24.2 | 7.68 |
| H12 | 25.0 | 6.87 | 24.64 | 7.23 | 24.77 | 7.11 | 24.90 | 6.98 | 24.9 | 6.98 |
| H13 | 23.9 | 8.01 | 23.45 | 8.44 | 23.56 | 8.32 | 23.73 | 8.15 | 23.7 | 8.14 |
| H14 | 24.3 | 7.54 | 23.98 | 7.88 | 24.06 | 7.80 | 24.20 | 7.65 | 24.2 | 7.64 |
| H15 | 24.3 | 7.57 | 23.98 | 7.93 | 24.06 | 7.84 | 24.20 | 7.68 | 24.2 | 7.68 |
| H16 | 24.2 | 7.64 | 23.59 | 8.29 | 23.71 | 8.17 | 24.03 | 7.85 | 24.0 | 7.84 |
| C2 | 74.52 | 107.95 | 70.51 | 111.95 | 70.50 | 111.96 | 72.97 | 109.50 | 73.07 | 109.39 |
| C3 | 92.13 | 90.34 | 94.43 | 88.04 | 94.41 | 88.06 | 93.14 | 89.33 | 93.07 | 89.40 |
| C4 | 75.26 | 107.19 | 75.66 | 106.81 | 75.63 | 106.84 | 75.42 | 107.04 | 75.40 | 107.06 |
| C5 | 76.10 | 106.36 | 76.54 | 105.93 | 76.45 | 106.02 | 76.36 | 106.10 | 76.34 | 106.12 |
| C6 | 74.10 | 108.36 | 74.73 | 107.73 | 74.60 | 107.86 | 74.43 | 108.04 | 74.40 | 108.06 |
| C7 | 86.68 | 95.78 | 84.22 | 98.24 | 84.38 | 98.09 | 85.89 | 96.57 | 85.95 | 96.06 |
| C8 | 60.08 | 122.39 | 58.83 | 123.64 | 59.27 | 123.19 | 59.74 | 122.72 | 59.76 | 122.70 |
| C9 | 65.90 | 116.57 | 65.43 | 117.03 | 65.76 | 116.71 | 65.73 | 116.73 | 65.73 | 116.74 |

**Table S13.** Calculated energy values for 1H-indole by 6-31++G(d,p) method in eV.

| **FMOs** | **Gas** | **Water** | **Acetonitrile** | **Toluene** | **Ccl4** |
| --- | --- | --- | --- | --- | --- |
| **EHOMO** | -5.74 | -5.77 | -5.75 | -5.70 | -5.70 |
| **ELUMO** | -0.567 | -0.620 | -0.604 | -0.504 | -0.540 |
| **EHOMO-1** | -6.19 | -6.25 | -6.24 | -6.17 | -6.17 |
| **ELUMO+1** | -0.360 | 0.000816 | -0.000544 | -0.122 | -0.134 |
| **EHOMO-2** | -7.69 | -7.76 | -7.74 | -7.67 | -7.66 |
| **ELUMO+2** | 0.0852 | 0.305 | 0.300 | 0.196 | 0.190 |
| **ΔE1** | 5.17 | 5.15 | 5.15 | 5.16 | 5.16 |
| **ΔE2** | 5.83 | 6.25 | 6.24 | 6.05 | 6.04 |
| **ΔE3** | 7.78 | 8.06 | 8.04 | 7.87 | 7.85 |
| **Ionisation potential, Ip** | 5.74 | 5.77 | 5.75 | 5.70 | 5.70 |
| **Electron affinity, EA** | 0.567 | 0.620 | 0.604 | 0.540 | 0.540 |
| **Electronegativity, χ** | 3.15 | 3.20 | 3.18 | 3.12 | 3.12 |
| **Chemical potential, μ** | -3.15 | -3.20 | -3.18 | -3.12 | -3.12 |
| **Global hardness, η** | 2.59 | 2.58 | 2.57 | 2.58 | 2.58 |
| **Global softness, S** | 0.193 | 0.194 | 0.195 | 0.194 | 0.194 |
| **Electrophilicity index, ω** | 1.92 | 1.98 | 1.97 | 1.89 | 1.89 |
| **Hyperhardness, Г** | 4.72 | 4.67 | 4.66 | 4.69 | 4.69 |
| **Global nucleophilicity, ɛ** | 0.520 | 0.505 | 0.508 | 0.529 | 0.529 |
| **ΔEback-donation** | -0.648 | -0.635 | -0.643 | -0.645 | -0.645 |
| **ΔNmax** | -1.26 | -1.240 | -1.24 | -1.20 | -1.20 |
| **Electron donating capability, w-** | 3.82 | 3.90 | 3.87 | 3.77 | 3.77 |
| **Electron accepting capability, w+** | 0.669 | 0.707 | 0.695 | 0.647 | 0.647 |
| **Transport (quasiparticle) gap, Egtrans** | 5.17 | 5.15 | 5.15 | 5.16 | 5.16 |

**Table S14.** Second-order perturbation theory analysis of the Fock Matrix in NBO basis

| **Donor**  **NBO (i)** | **Type** | **Acceptor**  **NBO (j)** | **Type** | **E (2)**  **kcal/mol** | **E(j)-E(i)**  **a.u.** | **F (i, j)**  **a.u.** |
| --- | --- | --- | --- | --- | --- | --- |
| N1-C2 | σ | C3-H12  C7-C8 | σ*  σ* | 2.36  4.55 | 1.28  1.36 | 0.049  0.070 |
| N1-C8 | σ | C2-H11  C4-C9 | σ*  σ* | 2.02  2.31 | 1.27  1.38 | 0.045  0.051 |
| N1-H10 | σ | C2-C3  C8-C9 | σ*  σ* | 1.31  1.89 | 1.29  1.23 | 0.037  0.043 |
| C2-C3 | σ | N1-H10  C4-C9 | σ*  σ* | 2.88  5.44 | 1.14  1.28 | 0.051  0.074 |
| C2-C3 | π | C2-C3  C8-C9 | π*  π* | 1.01  15.55 | 0.29  0.29 | 0.016  0.067 |
| C2-H11 | σ | N1-C8  C3-C9 | σ*  σ* | 2.73  1.81 | 1.02  1.09 | 0.047  0.040 |
| C3-C9 | σ | C2-H11  C4-C9  C7-C8 | σ*  σ*  σ* | 4.22  3.51  3.86 | 1.12  1.23  1.22 | 0.062  0.059  0.061 |
| C3-H12 | σ | N1-C2  C8-C9 | σ*  σ* | 2.55  1.98 | 0.97  1.07 | 0.044  0.041 |
| C4-C5 | σ | C3-C9  C4-C9 | σ*  σ* | 4.73  2.69 | 1.22  1.26 | 0.068  0.052 |
| C4-C5 | π | C6-C7  C8-C9 | π*  π* | 19.21  16.69 | 0.28  0.27 | 0.066  0.064 |
| C4-C9 | σ | C3-C9  C8-C9 | σ*  σ* | 3.51  2.91 | 1.21  1.23 | 0.058  0.053 |
| C4-H13 | σ | C5-C6  C8-C9 | σ*  σ* | 3.95  3.96 | 1.07  1.05 | 0.058  0.058 |
| C5-C6 | σ | C7-H16 | σ* | 2.37 | 1.14 | 0.047 |
| C5-H14 | σ | C4-C9  C6-C7 | σ*  σ* | 3.85  3.75 | 1.09  1.09 | 0.058  0.057 |
| C6-C7 | σ | N1-C8 | σ* | 6.18 | 1.15 | 0.075 |
| C6-C7 | π | C4-C5  C8-C9 | π*  π* | 16.78  18.54 | 0.29  0.28 | 0.063  0.068 |
| C6-H15 | σ | C4-C5  C7-C8 | σ*  σ* | 3.66  3.56 | 1.11  1.08 | 0.057  0.055 |
| C7-C8 | σ | C8-C9 | σ* | 3.71 | 1.24 | 0.061 |
| C7-H16 | σ | C5-C6  C8-C9 | σ*  σ* | 3.71  4.23 | 1.09  1.07 | 0.057  0.060 |
| C8-C9 | σ | N1-H10  C7-C8 | σ*  σ* | 3.28  3.57 | 1.09  1.23 | 0.054  0.059 |
| C8-C9 | π | C2-C3  C4-C5  C6-C7 | π*  π*  π* | 17.72  19.14  18.64 | 0.26  0.28  0.27 | 0.063  0.067  0.065 |
| N1 | LP (1) | C2-C3  C8-C9 | π*  π* | 35.26  34.25 | 0.29  0.30 | 0.092  0.093 |
| C8-C9 | π* | C4-C5 | π* | 309.61 | 0.01 | 0.080 |

**Table S15**. Second-order perturbation theory analysis of Fock matrix in NBO basis of 1H-indole for the solvents like water, acetonitrile, toluene and CCl4.

| **Donor NBO (i)** | **Type** | **Acceptor**  **NBO (j)** | **Type** | **E (2)**  **kcal/mol** | **E(j)-E(i)**  **a.u** | **F (i,j)**  **a.u** |
| --- | --- | --- | --- | --- | --- | --- |
| **Water** | | | | | | |
| C2-C3 | π | C8-C9 | π* | 16.12 | 0.29 | 0.067 |
| C4-C5 | π | C6-C7  C8-C9 | π*  π* | 18.56  16.20 | 0.28  0.28 | 0.066  0.064 |
| C6-C7 | π | C4-C5  C8-C9 | π*  π* | 17.17  18.20 | 0.29  0.28 | 0.063  0.068 |
| C8-C9 | π | C2-C3  C4-C5  C6-C7 | π*  π*  π* | 17.03  19.49  18.66 | 0.27  0.27  0.27 | 0.062  0.067  0.065 |
| N1 | LP (1) | C2-C3  C8-C9 | π*  π* | 38.00  37.10 | 0.28  0.28 | 0.095  0.094 |
| **Acetonitrile** |
| C2-C3 | π | C8-C9 | π* | 16.16 | 0.29 | 0.067 |
| C4-C5 | π | C6-C7  C8-C9 | π*  π* | 18.57  16.19 | 0.28  0.28 | 0.066  0.064 |
| C6-C7 | π | C4-C5  C8-C9 | π*  π* | 17.13  18.18 | 0.29  0.28 | 0.063  0.068 |
| C8-C9 | π | C2-C3  C4-C5  C6-C7 | π*  π*  π* | 17.11  19.49  18.63 | 0.26  0.27  0.27 | 0.062  0.067  0.065 |
| N1 | LP (1) | C2-C3  C8-C9 | π*  π* | 38.09  37.14 | 0.28  0.28 | 0.095  0.094 |
| **Toluene** |
| C2-C3 | π | C8-C9 | π* | 15.82 | 0.29 | 0.067 |
| C4-C5 | π | C6-C7  C8-C9 | π*  π* | 18.98  16.46 | 0.28  0.27 | 0.066  0.064 |
| C6-C7 | π | C4-C5  C8-C9 | π*  π* | 16.90  18.36 | 0.29  0.28 | 0.063  0.068 |
| C8-C9 | π | C2-C3  C4-C5  C6-C7 | π*  π*  π* | 17.50  19.31  18.67 | 0.26  0.28  0.27 | 0.063  0.067  0.065 |
| N1 | LP (1) | C2-C3  C8-C9 | π*  π* | 36.54  35.49 | 0.29  0.29 | 0.093  0.093 |
| **Ccl4** |
| C2-C3 | π | C8-C9 | π* | 15.81 | 0.29 | 0.067 |
| C4-C5 | π | C6-C7  C8-C9 | π*  π* | 18.99  16.47 | 0.28  0.27 | 0.066  0.064 |
| C6-C7 | π | C4-C5  C8-C9 | π*  π* | 16.89  18.37 | 0.29  0.28 | 0.063  0.068 |
| C8-C9 | π | C2-C3  C4-C5  C6-C7 | π*  π*  π* | 17.51  19.30  18.67 | 0.26  0.28  0.27 | 0.063  0.067  0.065 |
| N1 | LP (1) | C2-C3  C8-C9 | π*  π* | 36.46  35.41 | 0.29  0.29 | 0.093  0.093 |

**Table 16.** Representing the summary of natural population analysis and Mulliken charges

| **Atoms** | **Gas** | | **Water** | | **Acetonitrile** | | **Toluene** | | **CCl4** | |
| --- | --- | --- | --- | --- | --- | --- | --- | --- | --- | --- |
|  | **Natural**  **charges** | **Mulliken**  **charges** | **Natural**  **charges** | **Mulliken**  **charges** | **Natural**  **charges** | **Mulliken**  **charges** | **Natural**  **charges** | **Mulliken**  **charges** | **Natural**  **charges** | **Mulliken**  **charges** |
| N1 | -0.52 | -0.257 | -0.569 | -0.195 | -0.569 | -0.284 | -0.571 | -0.271 | -0.571 | -0.270 |
| C2 | -0.0390 | 0.0691 | -0.087 | 0.0806 | -0.0387 | 0.0335 | -0.0394 | 0.0522 | -0.0394 | 0.0532 |
| C3 | -0.312 | -0.0553 | -0.347 | -0.192 | -0.346 | -0.146 | -0.327 | -0.0973 | -0.326 | -0.0947 |
| C4 | -0.214 | -0.261 | -0.237 | -0.310 | -0.237 | -0.306 | -0.223 | -0.282 | -0.223 | -0.281 |
| C5 | -0.260 | 0.0500 | -0.283 | -0.0113 | -0.283 | -0.00700 | -0.270 | -0.0252 | -0.270 | 0.0269 |
| C6 | -0.243 | -0.204 | -0.268 | -0.179 | -0.267 | -0.260 | -0.253 | -0.227 | -0.253 | -0.226 |
| C7 | -0.264 | -0.290 | -0.272 | -0.278 | -0.272 | -0.292 | -0.268 | -0.297 | -0.268 | -0.297 |
| C8 | 0.141 | -1.24 | 0.131 | -1.07 | 0.132 | -1.06 | 0.137 | -1.16 | 0.137 | -1.17 |
| C9 | -0.102 | 1.19 | -0.119 | 1.04 | -0.118 | 1.00 | -0.108 | 1.12 | -0.108 | 1.12 |
| H10 | 0.438 | 0.316 | 0.473 | 0.290 | 0.472 | 0.378 | 0.453 | 0.345 | 0.452 | 0.343 |
| H11 | 0.236 | 0.145 | 0.259 | -.174 | 0.260 | 0.195 | 0.246 | 0.168 | 0.245 | 0.167 |
| H12 | 0.247 | 0.116 | 0.260 | 0.135 | 0.260 | 0.154 | 0.252 | 0.133 | 0.252 | 0.132 |
| H13 | 0.237 | 0.0995 | 0.252 | 0.118 | 0.252 | 0.140 | 0.243 | 0.117 | 0.243 | 0.116 |
| H14 | 0.236 | 0.1008 | 0.50 | 0.120 | 0.249 | 0.139 | 0.242 | 0.117 | 0.242 | 0.116 |
| H15 | 0.236 | 0.113 | 0.251 | 0.133 | 0.250 | 0.151 | 0.242 | 0.130 | 0.242 | 0.129 |
| H16 | 0.236 | 0.110 | 0.259 | 0.139 | 0.258 | 0.162 | 0.245 | 0.132 | 0.245 | 0.130 |
